# Supplementary material for: Genome-Wide Analysis in Drosophila Reveals the Genetic Basis of Variation in Age-Specific Physical Performance and Response to ACE Inhibition
Source: Genes (Basel). 2022 Jan 14;13(1):143. doi: 10.3390/genes13010143 (PMC8775566; doi:10.3390/genes13010143)
Supplement: Supplementary file 1 [file genes-13-00143-s001.zip]

Archive with 8 entries (8 files):
- Genes Final 1_13_22 supplemental files.pdf
- Supplementary Table S1 qRT-PCR of in vivo RNAi-axn, RNAifz, RNAi-nemo, RNAi-wingless.xlsx
- Supplementary Table S2 Sensitivity of 126 DRGP lines to Lisinopril treatment results.xlsx
- Supplementary Table S3 Physical performance results andmeans of 126 DGRP lines submitted to DGRP pipeline.xlsx
- Supplementary Table S4 GWA results for physical performanc.xlsx
- Supplementary Table S5 Candidate gene information.xlsx
- Supplementary Table S6 GWA results for sensitivity to Lisinopril.xlsx
- Supplementary Table S7 Physical performance of in vivo RNAi lines.xlsx
