# Supplementary material for: Genome-Wide Analysis in Drosophila Reveals the Genetic Basis of Variation in Age-Specific Physical Performance and Response to ACE Inhibition
Source: Genes (Basel). 2022 Jan 14;13(1):143. doi: 10.3390/genes13010143 (PMC8775566; doi:10.3390/genes13010143)
Supplement: Supplementary file 1 [file genes-13-00143-s001.zip › Supplementary Table S1 qRT-PCR of in vivo RNAi-axn, RNAifz, RNAi-nemo, RNAi-wingless.xlsx]

## Sheet: Raw qPCR results
Supplementary Table S1 qRT-PCR of in vivo RNAi-axn, RNAifz, RNAi-nemo, RNAi-wingless
Target	Sample	Cq	Cq Mean
Axn	A1C	29.7671	29.6403
Axn	A1C	30.138	29.6403
Axn	A1C	29.0158	29.6403
rp49	A1C	19.9781	20.1338
rp49	A1C	20.2309	20.1338
rp49	A1C	20.1926	20.1338
rp49	F1C	19.2849	19.338
rp49	F1C	19.3727	19.338
rp49	F1C	19.3562	19.338
Axn	A2C	28.1991	28.0772
Axn	A2C	28.0672	28.0772
Axn	A2C	27.9652	28.0772
rp49	A2C	19.1463	19.3647
rp49	A2C	19.5446	19.3647
rp49	A2C	19.4034	19.3647
rp49	F2C	19.0062	18.9801
rp49	F2C	18.9376	18.9801
rp49	F2C	18.9963	18.9801
Axn	A3C	30.4258	30.6596
Axn	A3C	30.9762	30.6596
Axn	A3C	30.5769	30.6596
rp49	A3C	22.2838	22.2749
rp49	A3C	22.2805	22.2749
rp49	A3C	22.2604	22.2749
rp49	F3C	19.6919	19.6524
rp49	F3C	19.6325	19.6524
rp49	F3C	19.6327	19.6524
wg	W1C	35.969	35.8564
wg	W1C	35.4862	35.8564
wg	W1C	36.1139	35.8564
rp49	W1C	20.0531	20.1157
rp49	W1C	20.1255	20.1157
rp49	W1C	20.1683	20.1157
nmo	N1C	25.9094	25.9732
nmo	N1C	26.0007	25.9732
nmo	N1C	26.0096	25.9732
rp49	N1C	18.7802	18.826
rp49	N1C	18.7481	18.826
rp49	N1C	18.9498	18.826
wg	W2C	34.3883	34.6656
wg	W2C	34.5438	34.6656
wg	W2C	35.0649	34.6656
rp49	W2C	20.503	20.5637
rp49	W2C	20.6455	20.5637
rp49	W2C	20.5425	20.5637
nmo	N2C	26.9542	26.8782
nmo	N2C	26.8514	26.8782
nmo	N2C	26.829	26.8782
rp49	N2C	19.6238	19.7246
rp49	N2C	19.6225	19.7246
rp49	N2C	19.9275	19.7246
wg	W3C	33.8683	32.9341
wg	W3C	32.397	32.9341
wg	W3C	32.537	32.9341
rp49	W3C	19.0616	19.0889
rp49	W3C	19.0709	19.0889
rp49	W3C	19.1341	19.0889
nmo	N3C	26.4248	26.4356
nmo	N3C	26.4463	26.4356
nmo	N3C	26.4357	26.4356
rp49	N3C	19.0442	19.0563
rp49	N3C	19.066	19.0563
rp49	N3C	19.0588	19.0563
Axn	C1	25.8447	25.9033
Axn	C1	26.019	25.9033
Axn	C1	25.8462	25.9033
wg	C1	30.2925	30.3604
wg	C1	30.5661	30.3604
wg	C1	30.2227	30.3604
nmo	C1	24.6141	24.5572
nmo	C1	24.5097	24.5572
nmo	C1	24.5479	24.5572
rp49	C1	18.2571	18.2193
rp49	C1	18.1905	18.2193
rp49	C1	18.2104	18.2193
Axn	C2	27.3743	27.6012
Axn	C2	27.7966	27.6012
Axn	C2	27.6326	27.6012
wg	C2	31.0369	31.3769
wg	C2	31.869	31.3769
wg	C2	31.2248	31.3769
nmo	C2	26.0788	26.0988
nmo	C2	26.1565	26.0988
nmo	C2	26.0612	26.0988
rp49	C2	19.3319	19.4446
rp49	C2	19.3606	19.4446
rp49	C2	19.6413	19.4446
Axn	C3	27.6903	27.705
Axn	C3	27.8344	27.705
Axn	C3	27.5902	27.705
wg	C3	31.8831	31.977
wg	C3	NaN	0
wg	C3	32.0709	31.977
nmo	C3	26.5809	26.6506
nmo	C3	26.5546	26.6506
nmo	C3	26.8163	26.6506
rp49	C3	19.0369	18.9893
rp49	C3	18.9823	18.9893
rp49	C3	18.9487	18.9893
Fz	F1A	27.5695	27.4955
Fz	F1A	27.5558	27.4955
Fz	F1A	27.3612	27.4955
Rp49	F1A	16.6742	16.7254
Rp49	F1A	16.7389	16.7254
Rp49	F1A	16.7632	16.7254
Fz	F1B	29.1578	29.0448
Fz	F1B	29.3358	29.0448
Fz	F1B	28.6408	29.0448
Rp49	F1B	16.7495	16.8657						Ra
Rp49	F1B	17.0894	16.8657
Rp49	F1B	16.7583	16.8657
Fz	F1C	28.0451	28.1739
Fz	F1C	28.1377	28.1739
Fz	F1C	28.3388	28.1739
Rp49	F1C	16.9588	16.9161
Rp49	F1C	16.9011	16.9161
Rp49	F1C	16.8885	16.9161
Fz	C1	26.7021	26.7102
Fz	C1	26.8873	26.7102
Fz	C1	26.5413	26.7102
Fz	C2	28.9745	28.9472
Fz	C2	29.2145	28.9472
Fz	C2	28.6526	28.9472
Fz	C3	28.8508	28.7935
Fz	C3	29.0415	28.7935
Fz	C3	28.4881	28.7935

## Sheet: Ct values and calcualtions
Line	Axn Ct Values	Fz Ct Values	nmo Ct Values	Wg Ct Values	Rp49 Ct Values	Axn Delta Ct	fz Delta Ct	nmo Delta Ct	wg Delta Ct	Axn Average Delta Ct	fz Average Delta Ct	nmo Average Delta Ct	wg Average Delta Ct	Target Delta Delta Ct	Fold Change	Average Fold Change	SEM
dj667Gal4 x attP2	25.9033	26.7102	24.5572	30.3604	18.2193	7.68395		6.33785	12.1411	8.1854	9.26589	6.88445	12.3537
	27.6012	28.9472	26.0988	31.3769	19.4446	8.15655		6.65419	11.9323
	27.705	28.7935	26.6506	31.977	18.9893	8.71569		7.6613	12.9877
dj667Gal4 x RNAi Axn	29.6403				20.1338	9.50648								1.32109	0.400234	0.655051	0.137268
	28.0772				19.3647	8.71243								0.527029	0.693982	0.344949
	30.6596				22.2749	8.38476								0.19936	0.870937
dj667Gal4 x RNAi Fz		27.4955			16.7254		10.7701							1.50418	0.35253	0.245568	0.0635114
		29.0448			16.8657		12.1791							2.91318	0.132754	0.754432
		28.1739			16.9161		11.2577							1.99183	0.25142
dj667Gal4 x RNAi nmo			25.9732		18.826			7.14716						0.262716	0.833517	0.790997	0.0406904
			26.8782		19.7246			7.15356						0.269114	0.829829	0.209003
			26.4356		19.0563			7.37928						0.494833	0.709644
dj667Gal4 x RNAi wg				35.8564	20.1157				15.7407					3.38703	0.0955876	0.246981	0.077063
				34.6656	20.5637				14.102					1.7483	0.297652	0.75
				32.9341	19.0563				13.8778					1.52408	0.347702
Supplemental Table 7. Ct values and calculations for fold change in Axn, fz, nmo, and wg expression. Ct values for three biological replicates were made relative to the Ct values for the reference gene Rp49 (Delta Ct). Delta Ct values were averaged and then made relative to the control line dj667Gal4 x attP2 (Delta Delta Ct). Finally, fold change was calculated.
