# Supplementary material for: Genome-Wide Analysis in Drosophila Reveals the Genetic Basis of Variation in Age-Specific Physical Performance and Response to ACE Inhibition
Source: Genes (Basel). 2022 Jan 14;13(1):143. doi: 10.3390/genes13010143 (PMC8775566; doi:10.3390/genes13010143)
Supplement: Supplementary file 1 [file genes-13-00143-s001.zip › Supplementary Table S2 Sensitivity of 126 DRGP lines to Lisinopril treatment results.xlsx]

## Sheet: Climbing speed
Supplementary Table S2 Sensitivity of 126 DRGP lines to Lisinopril treatment results
Genotype Identifier	DGRP Line	Sensitivity 1 week	Sensitivity 5 weeks
1	21	0.309713	0.264564
2	26	0.416549	2.64564
3	28	-0.471956	0.837788
4	31	1.26891	2.11651
5	32	-0.202735	4.4535
6	38	-0.230309	1.4551
7	40	0.259532	0.396846
8	41	-1.26565	2.55745
9	45	2.77269	0.837786
10	49	-1.90302	2.51336
11	73	3.84323	3.04059
12	75	2.68611	1.5295
13	83	2.67468	0.0973768
14	88	0.208485	-1.37635
15	91	4.46919	4.85749
16	100	0.113543	-2.77177
17	101	1.80507	-0.450591
18	105	1.15599	0.96541
19	136	1.28692	0.444501
20	142	0.331095	0.154778
21	149	3.49141	-0.0577848
22	158	1.07012	-1.76376
23	181	0.563756	-0.299839
24	189	-0.179942	1.9132
25	195	-0.133251	3.52752
26	208	-1.69584	-0.352753
27	217	5.05672	-0.793693
28	223	4.86196	2.79997
29	227	1.73568	-4.98263
30	228	9.07476	-2.02833
31	229	1.99877	8.24559
32	237	0.509088	-0.127873
33	239	-0.136668	0.584415
34	280	-2.87003	-2.16061
35	287	5.48039	1.69333
36	303	-0.410004	-1.54682
37	304	0.649173	0.576802
38	310	-3.07503	-3.53746
39	313	3.79254	5.47448
40	317	-0.478338	-1.85573
41	319	0.546672	3.27183
42	320	3.3142	5.43072
43	321	0.170834	3.38413
44	335	0.142322	2.91913
45	336	-2.08966	2.73524
46	338	1.42943	2.71254
47	348	4.11287	-0.0753042
48	350	6.32511	2.86309
49	352	2.95565	1.25457
50	354	2.4054	2.78292
51	359	-3.52161	2.05357
52	360	-2.54479	-2.82718
53	362	4.60305	3.36901
54	370	-0.364337	7.21088
55	371	3.828	-2.6274
56	373	0.108941	2.3033
57	374	1.18052	3.75121
58	379	1.03001	-2.34557
59	380	-0.108339	0.950597
60	383	4.17434	0.92982
61	385	1.00053	-5.77503
62	391	3.35402	0.831592
63	395	2.07369	-3.67907
64	399	-3.01376	0.0797794
65	406	2.33995	-0.225079
66	409	3.0067	-2.02833
67	426	3.6217	4.62987
68	427	1.81085	4.62987
69	439	3.17753	4.05665
70	440	1.23001	1.54329
71	441	-0.512505	1.89604
72	443	1.29835	0.705504
73	486	3.65587	2.55745
74	491	2.83586	-1.23463
75	492	0.512505	-1.33164
76	505	0.92193	-1.21306
77	508	-1.15699	1.56841
78	509	0.365405	0.139669
79	513	0.64078	2.92375
80	528	-1.52168	-1.8734
81	530	-1.13243	-0.3373
82	531	0.917344	1.70404
83	535	-0.510788	-0.156848
84	551	-0.214307	1.88687
85	555	-0.436044	0.279582
86	566	1.88602	1.12914
87	584	1.87577	-1.76376
88	589	4.82438	4.97822
89	596	2.23452	-1.75935
90	630	1.36326	1.24345
91	634	-0.463115	-0.859834
92	639	2.45511	3.07776
93	642	1.77886	1.41829
94	703	-0.0560271	2.46045
95	714	0.902966	1.48597
96	721	3.74121	2.42517
97	727	0.682839	3.08705
98	730	2.65949	1.65367
99	737	2.44256	1.47412
100	738	-0.240106	1.66495
101	748	1.67262	0.584438
102	787	1.09435	2.29162
103	790	2.39283	3.31097
104	799	1.03445	2.83172
105	801	2.06749	0.631584
106	802	-0.739562	4.18552
107	804	1.36622	4.16491
108	818	-1.82743	-3.13921
109	819	-2.97124	-0.130201
110	820	-3.95724	-2.45125
111	822	-0.991369	3.52496
112	837	-0.00557196	-4.56914
113	849	-0.862997	4.05662
114	850	-0.281989	-3.79283
115	852	-0.587567	0.972316
116	853	1.94752	11.4233
117	861	1.92918	0.902376
118	882	-2.2097	0.170664
119	884	0.286568	1.08666
120	887	-2.62153	-3.20551
121	890	1.19843	-4.7443
122	894	0.847676	1.85404
123	897	0.0657349	1.93642
124	900	3.73168	0.0998783
125	907	-2.01829	0.472964
126	908	-1.44433	0.313737

## Sheet: Endurance
Genotype Identifier	DGRP Line	Sensitivity 1 week	Sensitivity 5 weeks
1	21	-5.91939	0.318473
2	26	1.38343	-0.545953
3	28	-0.108447	1.54687
4	31	5.06014	1.45588
5	32	0.991093	1.09191
6	38	1.3942	2.22931
7	40	1.19878	2.63877
8	41	-4.41475	6.05098
9	45	1.16264	0.773434
10	49	-2.12427	0.545953
11	73	4.24608	3.13268
12	75	0.731551	2.12193
13	83	3.44878	2.21865
14	88	0.833986	-0.280715
15	91	3.96581	1.35011
16	100	-1.31818	-2.21882
17	101	-1.2707	-4.0114
18	105	-0.213269	0.918984
19	136	1.46526	-0.258844
20	142	-0.201206	6.69686
21	149	3.77383	0.315508
22	158	1.21692	0.454961
23	181	4.35895	0
24	189	1.24649	1.00091
25	195	0.93847	1.77435
26	208	-2.75457	0.591449
27	217	1.60528	-0.318473
28	223	0	1.41038
29	227	0.823219	-2.09282
30	228	1.52296	-6.32396
31	229	0.148179	6.46045
32	237	1.15251	0.591449
33	239	-0.740897	0
34	280	-1.35831	0
35	287	4.34248	0.674777
36	303	-3.3752	0.314881
37	304	-0.0823219	-0.181984
38	310	-2.67546	0.363969
39	313	-1.52296	1.18977
40	317	-2.18153	-0.955418
41	319	1.11135	0
42	320	0.123483	0
43	321	-0.452771	0
44	335	-0.257696	1.32257
45	336	-2.29824	0.320012
46	338	1.22909	-0.659415
47	348	5.73202	-0.820914
48	350	5.7983	3.85872
49	352	1.05229	1.11926
50	354	3.93969	2.84207
51	359	-2.18254	1.65377
52	360	-1.58797	-2.61031
53	362	5.13703	2.67689
54	370	2.60047	4.88156
55	371	4.69529	0.342985
56	373	0.59549	1.21631
57	374	2.2802	4.07841
58	379	2.56309	-1.39023
59	380	0.586427	0.495642
60	383	5.43819	0.979053
61	385	2.50209	-4.20851
62	391	4.39757	-0.407264
63	395	1.60739	-3.52918
64	399	-0.704203	-0.0227382
65	406	3.56564	0.896917
66	409	0.576254	-0.955418
67	426	5.68021	-0.363969
68	427	-1.11135	2.63877
69	439	3.86913	2.00183
70	440	-0.535093	0.864426
71	441	-3.33404	3.77618
72	443	3.12823	4.86808
73	486	3.08707	2.72977
74	491	1.97573	-1.27389
75	492	-1.76992	5.59602
76	505	3.2006	-1.4395
77	508	-0.819064	3.23393
78	509	1.10594	3.50758
79	513	1.61963	-0.883431
80	528	-1.61621	0.363465
81	530	-1.90593	2.68846
82	531	1.8156	2.09348
83	535	-0.558828	1.00726
84	551	2.63759	0.622976
85	555	0.79944	0.919402
86	566	3.64275	-0.627846
87	584	5.97657	1.11465
88	589	8.67673	4.59056
89	596	3.10354	-2.92085
90	630	1.71024	-0.309374
91	634	0.393857	0.150137
92	639	2.88144	3.41221
93	642	1.08412	2.98
94	703	-3.64656	2.95725
95	714	-2.09044	1.58326
96	721	2.96978	2.12012
97	727	0.917018	3.49237
98	730	3.72147	0.870447
99	737	2.41178	-1.45223
100	738	-0.890588	-1.85556
101	748	4.83823	4.20676
102	787	0.719198	4.9607
103	790	3.31581	4.47583
104	799	0.558486	4.8168
105	801	3.4507	0.49385
106	802	2.57386	3.01602
107	804	4.61638	2.99914
108	818	-2.10759	-3.15137
109	819	-4.01316	1.4426
110	820	-2.21271	-3.4441
111	822	-0.301081	2.32281
112	837	-2.04089	-3.49184
113	849	1.68318	6.58274
114	850	-0.960914	-2.29786
115	852	-0.0288683	-1.02452
116	853	3.02768	11.9931
117	861	0.58342	5.66852
118	882	-5.56718	-1.18177
119	884	2.52507	4.83316
120	887	-1.69407	-5.71059
121	890	1.27571	-0.203436
122	894	1.60477	-1.22683
123	897	-0.0269881	-4.01264
124	900	3.41816	-0.890894
125	907	-0.430868	0.846495
126	908	-1.73422	1.79592
