# Supplementary material for: Genome-Wide Analysis in Drosophila Reveals the Genetic Basis of Variation in Age-Specific Physical Performance and Response to ACE Inhibition
Source: Genes (Basel). 2022 Jan 14;13(1):143. doi: 10.3390/genes13010143 (PMC8775566; doi:10.3390/genes13010143)
Supplement: Supplementary file 1 [file genes-13-00143-s001.zip › Supplementary Table S3 Physical performance results andmeans of 126 DGRP lines submitted to DGRP pipeline.xlsx]

## Sheet: Climbing Speed and Endurance
DGRP	Week 1 Climbing Speed Control		Week 1 Climbing Speed Lisinopril-treated		Week 5 Climbing Speed Control		Week 5 Climbing Speed Lisinopril-treated		Week 1 Endurance Control		Week 1 Endurance Lisinopril-treated		Week 5 Endurance Control		Week 5 Endurance Lisinopril-treated
Line	Mean	SE	Mean	SE	Mean	SE	Mean	SE	Mean	SE	Mean	SE	Mean	SE	Mean	SE
1	1.13923	0.106073	1.16944	0.106286	0.18	0.0494568	0.2	0.0563242	18.516	5.991	11.3255	1.68724	0	0	0.35	0.35
2	1.88792	0.130273	1.92856	0.0894307	0.656667	0.0909317	0.856667	0.0971648	17.4261	2.01958	19.1066	1.75147	4.1	1.17942	3.5	1.12648
3	1.57535	0.0934769	1.52931	0.061994	0.903333	0.0726325	0.966667	0.0595642	19.5472	1.17767	19.4155	1.06524	11	1.25671	12.7	0.995853
4	1.54884	0.112641	1.67263	0.08852	0.806667	0.0833126	0.966667	0.0875376	13.311	1.72072	19.4578	1.50105	6.2	1.27388	7.8	1.4301
5	1.33782	0.134591	1.31804	0.143721	0.923333	0.089402	1.26	0.283841	12.0644	1.88641	13.2683	1.86323	7.5	1.34357	8.7	1.49031
6	1.47463	0.0957438	1.45216	0.0967811	0.75	0.0831492	0.86	0.06958	18.4159	1.33465	20.1095	1.45928	8.65	1.23669	11.1	1.06577
7	1.80526	0.0653711	1.83058	0.0782732	0.503333	0.15324	0.533333	0.080848	21.3104	0.983601	22.7666	1.1809	3.2	0.853189	6.1	1.03457
8	1.70432	0.0951288	1.58085	0.0885425	0.566667	0.0826756	0.76	0.0818746	23.6646	1.72695	18.3018	1.44603	3.35	1.04391	10	1.23805
10	1.42278	0.113189	1.69328	0.138309	0.17	0.0540647	0.233333	0.0670106	15.9679	1.79332	17.3802	1.92001	0.9	0.501377	1.75	0.77153
12	2.17195	0.099921	1.98629	0.0787283	1.01667	0.0987372	1.20667	0.0814994	27.3287	1.43162	24.7483	1.46498	13.6	1.53061	14.2	1.41981
16	1.51563	0.20767	1.89058	0.194778	0.60392	0.129069	0.833776	0.125756	17.0919	2.619	22.2498	2.35923	5.37848	1.41001	8.82128	1.57061
17	1.91219	0.112283	2.17425	0.104767	1.09223	0.0972492	1.20786	0.107155	24.3231	1.35734	25.2118	1.53249	11.5882	1.37213	13.9202	1.62853
18	1.28908	0.117816	1.55003	0.135533	0.928981	0.132568	0.936342	0.148631	14.3242	1.76846	18.5136	1.91262	5.83894	1.72858	8.27722	1.83363
20	1.59303	0.109028	1.61337	0.0905998	0.55434	0.104756	0.450293	0.0961145	20.6524	1.34814	21.6655	1.06769	4.89407	1.2802	4.58556	1.2563
21	1.13181	0.102275	1.56782	0.134507	0.305795	0.0814422	0.673002	0.0971331	14.7101	1.55155	19.5275	1.76322	3.89695	1.11767	5.38072	1.21285
23	1.76325	0.127319	1.77432	0.146627	1.25472	0.106729	1.04519	0.109732	22.5718	1.82725	20.9705	1.9068	14.1162	1.51517	11.6777	1.70531
24	1.72599	0.0924527	1.9021	0.132332	1.12069	0.0965467	1.08663	0.0982749	24.4572	2.33186	22.9136	1.65688	16.7436	5.81623	12.3351	1.52467
25	2.03804	0.0904212	2.15081	0.102363	1.23346	0.130655	1.30644	0.107264	24.0109	1.1277	23.7519	1.08236	13.9903	1.55707	15.0002	1.3878
28	2.20333	0.135738	2.32888	0.0848595	1.5482	0.110406	1.5818	0.10329	27.5093	1.79581	29.2892	1.29259	20.8666	1.33488	20.5822	1.42805
30	1.57989	0.139858	1.61219	0.109336	0.905034	0.107619	0.916735	0.145094	19.6284	1.42039	19.384	1.55556	11.6601	1.48168	19.0199	8.92994
31	1.23263	0.175833	1.57326	0.154042	0.751153	0.115475	0.746784	0.0989662	16.7718	3.93774	21.3561	2.65427	10.006	1.57521	10.3528	1.33093
33	1.62956	0.129146	1.73396	0.134907	0.943333	0.116034	0.81	0.11104	18.6694	1.78691	20.1477	1.54431	8.15	1.63003	8.65	1.56031
37	1.96733	0.132194	2.02233	0.124996	0.659333	0.132295	0.636667	0.139249	19.33	2.29941	24.625	1.34613	4.65	1.64686	4.65	1.33846
38	1.35954	0.105883	1.34198	0.164879	0.268703	0.0754967	0.413333	0.0759209	10.4713	1.6505	11.9854	1.8406	0.8	0.596253	1.9	0.662805
39	1.39633	0.13858	1.38333	0.125191	0.0866667	0.0379756	0.353333	0.0983465	15.94	1.75737	17.08	1.74967	0.2	0.2	2.15	0.843893
40	2.80575	0.276841	2.6403	0.285922	0.556667	0.113531	0.53	0.111947	21.4271	1.37318	18.081	2.00923	3.15	1.2812	3.8	1.42163
41	2.25333	0.344037	2.74667	0.436936	0.896667	0.107691	0.836667	0.115717	15.5	1.568	17.45	1.78425	6.05	1.29352	5.7	1.40086
42	2.60567	0.406623	3.08	0.588831	0.175	0.0762916	0.386667	0.108885	15	1.64317	15	1.84904	0.7	0.50719	2.25	1.1066
43	2.92333	0.616995	3.09267	0.685719	0.866667	0.0949692	0.49	0.0760142	17.1	1.00069	18.1	1.69573	6.9	0.86483	4.6	0.87178
44	2.22333	0.337492	3.10867	0.542446	0.66	0.0834046	0.506667	0.0920936	16.15	1.71808	18	1.59038	8.1	2.66258	1.15	0.657909
45	2.32433	0.251604	2.51933	0.40399	0.793333	0.123822	1.41667	0.145593	19.6	2.36344	19.78	1.93403	7.55	1.72229	14.65	1.82041
47	2.73667	0.439422	2.78633	0.363897	0.686667	0.114945	0.677	0.119155	16.95	2.1154	18.35	2.22682	4.3	1.18117	4.95	1.16889
48	1.23	0.12112	1.21667	0.146223	0.590549	0.106005	0.634729	0.108996	6.55	2.06634	5.65	1.97312	0	0	0	0
50	1.37667	0.119259	1.09667	0.0976133	0.823333	0.0953738	0.66	0.0980968	6.15	2.12175	4.5	1.78644	0	0	0	0
51	0.57	0.0798202	1.10467	0.129521	0.551045	0.0988592	0.679055	0.0883283	1.755	1.01422	7.03	1.96974	0	0	0.741577	0.527701
53	1.03333	0.065799	0.993333	0.0720685	0.654227	0.104173	0.537293	0.0919454	9.7	1.64746	5.6	1.4508	0.45	0.45	0.796053	0.572222
54	0.51	0.0685398	0.573333	0.0971944	0.148431	0.0367284	0.192035	0.0483366	2.95	1.11761	2.85	1.18471	0.2	0.2	0	0
58	1.38	0.0807152	1.08	0.113806	0.703478	0.0918199	0.43606	0.0885636	8.2	1.92408	4.95	1.68996	0	0	0.4	0.4
59	1.11667	0.128572	1.48667	0.10258	0.680145	0.123704	1.09399	0.0933352	6.45	2.0088	4.6	1.8236	1.25608	0.907109	2.56364	1.21626
61	0.94	0.135409	0.893333	0.137124	0.413619	0.0773937	0.273333	0.0720685	8.75	1.97102	6.1	1.93774	1.85	0.888674	0.8	0.8
63	0.796667	0.141623	0.85	0.166488	0.338823	0.0832568	0.586161	0.106112	3.1	1.54574	4.45	1.86365	0	0	0	0
64	1.05333	0.161297	1.37667	0.138687	0.246667	0.0871956	0.657207	0.121823	5.25	1.99536	5.4	2.11717	0	0	0	0
65	1.34667	0.134995	1.36333	0.138505	0.307506	0.086612	0.563333	0.10466	8.65	2.22798	8.1	2.37073	0	0	0	0
68	0.492273	0.0987604	0.506158	0.0772197	0.0566574	0.0269828	0.277332	0.0729324	5.18364	1.20578	4.87061	1.14008	0	0	1.4535	0.726022
69	1.2856	0.136556	1.08173	0.135034	0.536611	0.0808306	0.743384	0.101742	11.1205	1.88273	8.32872	1.84733	3.51002	1.02415	3.86171	1.23815
70	1.08227	0.159829	1.22173	0.139558	0.690693	0.128257	0.89575	0.109924	9.25985	1.94744	10.7529	2.01651	6.96787	1.53913	6.24318	1.54224
72	1.04643	0.112944	1.44768	0.132108	0.75381	0.108983	0.748117	0.10698	9.56207	1.78917	16.525	1.78164	6.27175	1.39812	5.36957	1.37617
73	1.02418	0.146893	1.64126	0.0907767	0.584682	0.110201	0.80112	0.12087	10.4442	1.91696	17.4876	1.63598	5.31508	1.42501	9.55579	1.57082
74	1.41141	0.152679	1.69976	0.111371	0.748526	0.12088	0.843367	0.121023	15.4445	2.07977	16.7228	2.10061	9.05623	1.76572	10.2863	1.94106
75	1.20623	0.124051	1.4409	0.129985	0.72869	0.0978911	0.939068	0.108788	12.5111	1.94128	17.2968	1.71568	9.5955	1.38902	12.7189	1.46816
80	1.47461	0.120562	1.13104	0.147651	0.467081	0.0947408	0.622323	0.094418	13.6864	1.93386	11.0352	2.04929	5.71581	1.2912	7.53329	1.3927
81	1.22209	0.11691	0.973815	0.127909	0.879528	0.100916	0.665805	0.107691	12.6018	1.77033	10.6728	1.77551	11.0593	1.4361	8.19058	1.71421
83	1.48979	0.138398	1.93886	0.155139	0.826667	0.113151	1.08135	0.12837	17.8245	1.84748	24.0647	1.52386	10.15	1.57351	13.0919	1.88051
86	1.15809	0.117981	1.12255	0.143248	0.518969	0.107989	1.06408	0.112863	11.0888	2.01066	14.2477	1.83851	2.82142	1.06114	8.18623	1.89285
87	1.30293	0.116392	1.67639	0.11056	0.878641	0.111927	0.68002	0.137409	14.2108	1.97677	19.9143	1.65497	4.2188	1.21053	4.59574	1.56542
88	0.938331	0.0958314	0.948959	0.113016	0.331658	0.0663031	0.505778	0.0868614	10.2434	1.28867	10.9667	1.59563	0.656353	0.459759	1.99307	0.7887
89	1.64452	0.0976952	1.75969	0.120609	0.824459	0.125542	1.10804	0.158581	20.7102	1.63961	23.48	1.69373	7.26158	1.53792	11.7437	2.47785
92	1.17344	0.119029	1.27392	0.113462	0.339552	0.0984651	0.162237	0.0573653	9.29218	1.8611	12.4057	1.50965	1.76935	0.880931	0.241503	0.241503
93	0.796633	0.0757239	0.786064	0.0770782	0.0616317	0.0232517	0.133493	0.0420415	8.4595	1.00237	9.17186	0.979531	0.143969	0.143969	0.688678	0.390146
96	1.09306	0.138212	1.50031	0.127527	0.498975	0.104396	0.569266	0.0928004	10.5372	1.84055	17.1432	1.748	3.82894	1.29107	4.90492	1.25217
97	1.50373	0.0977058	1.60134	0.0844752	1.05739	0.0788435	0.620823	0.139421	18.0372	1.43874	21.0766	1.0938	10.8207	1.29551	6.19556	1.67861
100	1.13039	0.109638	1.45761	0.105948	0.417454	0.0804362	0.480319	0.0900433	9.77349	1.57744	15.1154	1.71131	1.26458	0.572918	0.816996	0.574556
102	1.37433	0.0896605	1.57664	0.0614714	1.2551	0.0734648	0.976977	0.102443	16.8084	1.51077	18.761	1.34256	15.3495	0.889378	11.471	1.39999
104	1.48012	0.110108	1.18609	0.112282	1.09076	0.0779433	1.09679	0.0786087	16.8103	1.75498	15.9548	1.69115	15.1563	1.17199	15.1314	1.25067
106	0.812531	0.118002	1.04082	0.107373	0.452203	0.0809171	0.435188	0.0906562	3.76317	1.29552	8.09451	1.68144	2.23259	0.852262	3.2183	1.14456
108	0.88	0.131516	1.17333	0.145423	0.41	0.100727	0.256667	0.0824458	8.85	1.98444	9.55	2.11458	1.9	1.069	0.85	0.591681
109	1.16333	0.116903	1.51667	0.150866	0.586667	0.114041	0.936667	0.118853	8.05	1.93847	14.95	2.24279	5.2	1.3754	4.8	1.61042
110	1.38667	0.116336	1.56333	0.119046	0.516667	0.0948178	0.866667	0.0899979	15.4	1.99948	14.05	2.2623	3.5	1.22334	6.4	1.46852
112	1.46	0.146969	1.77	0.0871186	0.753333	0.105235	1.06	0.117796	16.25	2.12751	20.95	1.69962	6.6	1.60269	8.8	1.84307
113	1.29333	0.0928394	1.41333	0.0931854	0.753333	0.093062	0.87	0.0939736	17.1	1.21542	16.45	1.50083	10.25	1.31847	11.2	1.24097
114	1.31	0.119899	1.26	0.132752	0.726667	0.0971944	0.87	0.0889466	17.2	1.5218	13.15	1.97704	6.75	1.34501	10.9	1.3814
115	1.74	0.185609	1.86667	0.160196	0.756667	0.132325	0.81	0.134365	16	2.5062	19.8	2.32312	3.9	1.43767	9.25	1.71718
117	1.53	0.138643	1.88667	0.106429	0.7	0.108596	0.893333	0.117828	18.1	2.0694	21.85	1.81329	7.65	1.48675	10.65	1.63899
118	1.51333	0.131633	1.79	0.131249	0.913333	0.124544	0.82	0.116895	19	2.08856	21.4	1.97606	7.85	1.75236	6.45	1.61483
119	1.49333	0.133385	1.54333	0.135416	1.15	0.137778	1.04933	0.339522	20.15	1.60444	18	2.16596	7.05	1.82674	13.2	7.95431
121	1.33478	0.0949553	1.42473	0.098116	0.734279	0.1083	0.642576	0.0940632	6.07225	1.63394	9.96015	1.75335	3.08206	1.32055	1.50006	0.839132
122	1.21073	0.0952894	1.09786	0.137357	0.725384	0.0638144	0.84395	0.07688	10.6349	1.69847	9.63995	1.61287	6.06269	1.16739	9.61676	1.26457
123	1.4949	0.0717805	1.53055	0.0653792	0.767477	0.0670112	0.778036	0.0750671	18.0951	1.24889	19.4385	0.825837	6.05795	1.17439	9.91276	1.14015
124	1.55091	0.0674524	1.61342	0.0833003	0.723363	0.0962586	0.944388	0.10686	17.4446	1.65229	19.412	1.55055	5.87905	1.48087	4.90816	1.682
126	1.50953	0.0677877	1.36108	0.0899614	0.799387	0.092341	0.657765	0.109708	14.7356	1.85336	12.7723	1.89342	3.9212	1.13068	4.32065	1.53905
127	1.30467	0.0953635	1.19419	0.107817	0.540314	0.0822621	0.514816	0.0825892	11.288	1.92572	8.97276	1.93627	0.828926	0.495562	3.78353	1.11701
128	1.55481	0.113572	1.64431	0.103853	0.74055	0.0618669	0.869368	0.074009	16.0968	1.8442	18.3023	1.68046	5.8142	1.17468	8.11492	1.278
129	1.35414	0.11048	1.3043	0.119157	1.03079	0.0631584	1.01893	0.0978504	13.4922	1.98366	12.8134	1.92891	10.4342	1.44036	11.5411	1.5333
130	1.47678	0.100001	1.45587	0.0642635	0.875822	0.0939289	1.01846	0.079992	15.2601	2.00648	18.4641	1.0059	6.28582	1.57081	6.97046	1.52357
131	1.58732	0.112139	1.54478	0.127595	0.79424	0.0953909	0.815376	0.0833976	18.2871	1.89513	19.2582	2.13621	6.10837	1.45036	7.11879	1.3933
134	2.01667	0.165223	2.20067	0.216404	0.543308	0.0805767	0.628667	0.0867149	21.255	1.60582	25.68	2.06567	5.485	1.11951	4.795	1.0328
135	1.99933	0.216302	2.18233	0.21794	0.75	0.0853539	0.616667	0.0858029	19.965	2.29603	27.225	2.95051	6.45	1.12684	7.675	1.07714
136	1.35467	0.170799	1.82533	0.0911318	0.415	0.0731284	0.791333	0.106559	15.21	2.09748	25.75	1.97881	2.775	0.775523	7.82	1.45751
138	1.65067	0.125321	1.86867	0.117465	1.129	0.0850711	0.996	0.104106	23.2	1.43093	26.97	1.80961	16.475	1.18211	13.265	1.75265
140	0.830333	0.11853	0.963333	0.0785857	0.290333	0.0622499	0.384333	0.065544	10.42	1.87033	12.4975	1.34726	1.29	0.541674	0.95	0.451912
141	2.13131	0.122794	2.08613	0.106146	0.759667	0.0777758	0.694667	0.0922562	26.2107	2.08647	26.6892	1.71239	8.845	1.27443	9.01	1.4308
142	1.04174	0.115415	1.28126	0.148528	0.470333	0.0919451	0.703	0.0714515	8.47738	1.75877	11.9776	2.15082	3.66	1.12484	7.41	1.05596
143	1.25555	0.0724865	1.42909	0.106729	0.44655	0.0513276	0.553767	0.0678234	14.4835	0.906676	15.8004	1.8978	3.635	0.818925	6.91	0.964337
145	0.965544	0.115647	0.960078	0.0740939	0.423	0.0646034	0.609	0.0691265	11.518	1.29415	7.08837	1.51612	4.315	0.951152	7.565	1.01704
149	1.28159	0.0839627	1.36969	0.105205	0.688667	0.0642458	0.801	0.0535248	19.2587	2.57103	16.7193	1.46515	7.02	1.21059	8.76	0.939826
151	1.12686	0.119929	1.49185	0.119848	0.601	0.0794599	0.784333	0.0703761	11.3995	1.67596	15.007	2.10782	5.77	1.19076	8.1	1.15347
152	1.91121	0.104822	1.97782	0.128858	1.32871	0.0604996	1.56208	0.0589359	24.1031	1.42558	25.217	1.77191	14.9595	1.50295	18.7976	1.13324
153	1.62936	0.0872897	1.88882	0.0939023	1.36281	0.05416	1.48783	0.0714043	20.8321	1.40395	25.3528	1.44161	16.4145	1.34157	17.3711	1.53493
155	1.58903	0.107929	1.82733	0.106273	1.22579	0.106196	1.33722	0.0723519	17.6509	2.10124	20.5806	1.67504	12.3662	1.8387	10.7702	1.82221
156	1.85029	0.0780384	1.82687	0.108217	0.758588	0.108462	0.884452	0.107668	23.3163	1.31376	22.2345	1.98634	7.95763	6.29315	5.91837	1.40378
157	1.56338	0.133955	1.72656	0.123361	0.945147	0.142079	0.989328	0.194369	15.2624	2.51857	21.1397	1.74278	5.64706	2.24459	10.2703	2.69269
165	1.43596	0.0824387	1.54272	0.0756547	0.711974	0.0851406	0.885212	0.0766359	17.751	1.55797	18.6246	1.31231	1.75	0.842052	7.20178	1.3867
166	1.59187	0.0780758	1.82531	0.0971032	0.716286	0.0960493	0.966582	0.0869925	20.5548	1.2468	24.5826	1.33002	4.57977	1.36089	9.49868	1.49772
168	1.44039	0.0674899	1.54132	0.10786	1.07458	0.134019	1.28865	0.120554	18.2122	1.6005	18.8907	1.79726	7.50863	1.78994	12.8023	2.04398
169	1.86632	0.0621545	2.06803	0.0740177	0.41275	0.0692301	0.460496	0.0847559	21.9394	1.78627	26.1311	0.958184	3.17643	0.910305	3.71917	1.08612
170	2.09345	0.114558	2.0213	0.0788842	0.885099	0.102	1.20151	0.098142	23.4684	1.97575	26.595	1.49603	7.11928	1.53798	10.4339	1.75656
171	1.6579	0.0959853	1.79119	0.0849798	0.897741	0.109387	1.21259	0.0881571	22.2466	2.56362	27.8543	1.67476	13.4409	2.67296	16.7369	2.30887
176	1.55127	0.0919025	1.37298	0.105989	1.63333	0.0746383	1.39602	0.147141	24.5935	1.65571	22.0333	1.65562	25.35	1.90057	21.8867	2.48993
177	1.5961	0.131377	1.30622	0.106918	0.934023	0.0849157	0.92418	0.0950865	24.2634	1.88282	19.3884	1.9962	17.2971	2.18373	18.8825	3.37722
178	1.93011	0.244869	1.54405	0.148939	0.930389	0.0837091	0.745084	0.0848997	25.6495	2.13681	22.9616	2.17699	14.4158	1.83353	10.6307	1.70971
180	1.51014	0.107419	1.41342	0.109562	0.610765	0.103932	0.877238	0.0991818	22.5314	2.59645	22.1657	2.19642	7.43057	1.9235	9.98333	1.81225
182	1.20927	0.0931948	1.20872	0.131867	1.08232	0.137979	0.736907	0.121794	17.7667	1.99871	15.2876	2.51039	14.6779	2.27167	10.8404	2.29914
184	1.29199	0.0701679	1.2078	0.112768	0.999569	0.108343	1.30623	0.0843125	15.3439	1.79047	17.3885	1.54409	10.1128	2.30089	17.3472	1.78727
185	1.68715	0.121304	1.65964	0.112227	0.970056	0.11027	0.683333	0.10722	20.9129	1.99251	19.7456	2.37448	10.7037	2.04806	8.17839	1.90978
186	1.5863	0.125892	1.52898	0.0766785	0.75967	0.0967597	0.833173	0.155894	19.8567	2.32796	19.8217	2.16076	8.1629	1.7239	7.03696	1.65145
187	1.3	0.0980265	1.49	0.081417	0.4	0.0893141	1.26356	0.0959474	17.5277	1.93988	21.2056	1.82154	3.1	1.33378	16.2804	1.94552
190	1.48577	0.102106	1.67398	0.085182	0.898593	0.0816104	0.966809	0.120281	16.4531	1.5591	17.1618	1.7002	6.8879	1.62966	13.1176	1.95955
192	1.45546	0.10495	1.23988	0.104779	0.560085	0.0856593	0.572987	0.0906205	17.6562	6.54379	10.8935	1.52137	6.3021	1.89564	5.00334	1.3009
193	1.43161	0.116054	1.45957	0.116811	0.737473	0.116876	0.81962	0.120459	12.9325	1.54788	15.9998	2.0081	5.42641	1.60852	10.738	2.17171
194	1.81347	0.0868156	1.55772	0.11049	1.16893	0.0696832	0.926606	0.10848	22.9847	1.50928	20.9269	1.64728	18.5695	1.32046	12.2936	1.90174
195	1.41663	0.118402	1.53355	0.0910405	1.26023	0.0908166	0.901584	0.105893	18.6781	1.54636	20.2278	1.28712	12.5539	1.72083	12.3303	1.86277
197	1.41761	0.132752	1.50031	0.143126	0.811781	0.11823	0.95194	0.114752	13.9924	1.9036	15.9418	2.16639	10.0903	1.88948	8.74202	1.72208
198	1.62888	0.133779	1.63529	0.154445	1.1138	0.0946613	1.26018	0.10554	19.3224	2.15602	19.2896	2.1102	17.105	1.94545	12.6952	1.89734
199	1.72545	0.137062	2.08951	0.111902	1.19163	0.105019	1.19918	0.100576	22.0767	2.04107	26.2288	2.11672	13.2292	1.67044	12.2501	1.74913
200	1.80687	0.161013	1.60997	0.0991629	0.765089	0.114746	0.800843	0.109628	20.7944	1.961	20.271	1.6012	6.5768	1.4984	7.50709	1.8971
201	1.56273	0.0891493	1.42182	0.140357	0.714017	0.113192	0.737734	0.11178	19.8474	1.48972	17.7407	1.8817	7.80958	1.8269	9.78328	2.02328
