# Supplementary material for: Genome-Wide Analysis in Drosophila Reveals the Genetic Basis of Variation in Age-Specific Physical Performance and Response to ACE Inhibition
Source: Genes (Basel). 2022 Jan 14;13(1):143. doi: 10.3390/genes13010143 (PMC8775566; doi:10.3390/genes13010143)
Supplement: Supplementary file 1 [file genes-13-00143-s001.zip › Supplementary Table S4 GWA results for physical performanc.xlsx]

## Sheet: Climbing Speed (CS)
Supplementary Table S2. GWA results of climbing speed and endurance at one and five weeks of age. Output from the DGRP Freeze 2, release ___ analysis pipeline (http://dgrp.gnets.ncsu.edu/). Candidate SNPs associated with (sheet 1) age-specific climbing speed at P < 10-5.
Climbing Speed
Age (Weeks)	Treatment	Chrom/Pos	FlyBase ID	Gene Symbol	Site Class	SNP P-value
1	C	3L_9203774_SNP	|||			5.527e-06
1	C	2L_12333262_SNP	|||			1.596e-06
1	C	3L_2000594_SNP	|||			1.074e-06
1	C	3L_9203776_SNP	|||			7.911e-06
1	C	2R_17693199_SNP	|||			1.049e-05
1	C	3R_15188715_DEL	|||			7.664e-06
1	C	2L_17537887_SNP	|||			3.009e-05
1	C	3L_3683003_SNP	|||			6.119e-05
1	C	3L_3682976_SNP	|||			6.565e-05
1	C	2L_17014954_SNP	|||			4.178e-06
1	C	2R_1687881_SNP	|||			7.965e-06
1	C	2L_17784657_SNP	|||			9.624e-06
1	C	3L_15504392_SNP	FBgn0000565	Eip71CD	INTRON	1.762e-06
1	C	3L_15504415_DEL	FBgn0000565	Eip71CD	INTRON	2.932e-06
1	C	2R_18434571_SNP	FBgn0003175	px	INTRON	1.031e-06
1	C	2R_19525497_SNP	FBgn0004795	retn	INTRON	4.386e-07
1	C	3L_1092199_SNP	FBgn0004870	bab1	INTRON	3.302e-05
1	C	3R_26872843_SNP	FBgn0010015	CanA1	DOWNSTREAM	9.101e-06
1	C	2R_5115029_INS	FBgn0010114	hig	DOWNSTREAM	1.96e-06
1	C	3R_1297119_SNP	FBgn0011715	Snr1	INTRON	3.849e-07
1	C	3R_1297920_SNP	FBgn0011715	Snr1	NON_SYNONYMOUS_CODING	1.286e-06
1	C	2R_2547377_SNP	FBgn0013732	sced	SYNONYMOUS_CODING	9.918e-06
1	C	3L_2260229_SNP	FBgn0015360	oxt	SYNONYMOUS_CODING	2.834e-06
1	C	3R_25913089_INS	FBgn0015542	sima	INTRON	2.844e-06
1	C	X_1801269_SNP	FBgn0023511	Edem1	SYNONYMOUS_CODING	8.868e-06
1	C	3R_24529177_SNP	FBgn0027655	htt	INTRON	2.4e-05
1	C	X_7995298_SNP	FBgn0029997	CG2258	UTR_5_PRIME	4.618e-06
1	C	X_7995294_DEL	FBgn0029997	CG2258	UTR_5_PRIME	7.103e-05
1	C	X_16278780_SNP	FBgn0030744	CG9992	UPSTREAM	2.49e-05
1	C	2L_6446129_SNP	FBgn0031813	CG9527	SYNONYMOUS_CODING	4.627e-05
1	C	2R_3841980_SNP	FBgn0033236	CG14764	INTRON	8.452e-06
1	C	2R_3842016_SNP	FBgn0033236	CG14764	INTRON	2.939e-05
1	C	2R_4356187_SNP	FBgn0033296	Mal-A7	DOWNSTREAM	2.628e-07
1	C	2R_17126498_SNP	FBgn0034606	ASPP	INTRON	8.875e-06
1	C	2R_20438711_SNP	FBgn0035021	CG4622	INTRON	4.364e-06
1	C	3L_8331646_SNP	FBgn0035875	Cpr66Cb	UTR_3_PRIME	3.299e-05
1	C	3L_8331638_SNP	FBgn0035875	Cpr66Cb	UTR_3_PRIME	3.702e-05
1	C	3L_8332925_SNP	FBgn0035876	Pex2	INTRON	5.126e-06
1	C	3L_8332928_SNP	FBgn0035876	Pex2	INTRON	5.126e-06
1	C	3L_8332939_SNP	FBgn0035876	Pex2	INTRON	1.204e-05
1	C	3L_13506826_SNP	FBgn0036376	Liprin-beta	SYNONYMOUS_CODING	3.969e-07
1	C	3R_1252838_SNP	FBgn0037325	CG12147	NON_SYNONYMOUS_CODING	4.118e-06
1	C	3R_1283377_INS	FBgn0037326	CG14669	DOWNSTREAM	2.371e-05
1	C	3R_1283380_INS	FBgn0037326	CG14669	DOWNSTREAM	2.371e-05
1	C	3R_1279608_SNP	FBgn0037326	CG14669	INTRON	1.63e-05
1	C	3R_1289892_SNP	FBgn0037327	PEK	INTRON	1.336e-07
1	C	3R_1287165_SNP	FBgn0037327	PEK	NON_SYNONYMOUS_CODING	1.833e-06
1	C	3R_1284830_SNP	FBgn0037327	PEK	UTR_3_PRIME	7.981e-06
1	C	3R_1292660_SNP	FBgn0037328	RpL35A	INTRON	6.684e-07
1	C	3R_1293685_SNP	FBgn0037329	CG12162	UTR_5_PRIME	1.142e-05
1	C	3R_1295688_SNP	FBgn0037330	mRpL44	SYNONYMOUS_CODING	1.243e-06
1	C	3R_5450762_SNP	FBgn0037720	CG8312	UTR_3_PRIME	1.806e-05
1	C	3R_24518766_SNP	FBgn0039594	CG9990	INTRON	5.946e-06
1	C	3R_24503465_INS	FBgn0039594	CG9990	INTRON	3.219e-05
1	C	3L_10004732_SNP	FBgn0040823	dpr6	INTRON	5.773e-05
1	C	2R_1409381_SNP	FBgn0050438	CG30438	INTRON	1.243e-06
1	C	3R_26469967_SNP	FBgn0051013	CG31013	INTRON	6.496e-06
1	C	3R_26468899_SNP	FBgn0051013	CG31013	DOWNSTREAM	1.268e-05
1	C	3R_26470169_SNP	FBgn0051013	CG31013	INTRON	1.974e-05
1	C	3R_26470279_SNP	FBgn0051013	CG31013	SYNONYMOUS_CODING	9.692e-06
1	C	3R_7632221_SNP	FBgn0051116	ClC-a	INTRON	3.06e-06
1	C	3R_7114662_SNP	FBgn0051386	CR31386	INTRON	1.392e-05
1	C	2L_6839820_SNP	FBgn0051632	sens-2	DOWNSTREAM	4.721e-06
1	C	3L_3335646_SNP	FBgn0052274	Drsl1	NON_SYNONYMOUS_CODING	5.363e-06
1	C	3R_4583622_SNP	FBgn0083971	CG34135	INTRON	7.833e-06
1	C	2R_17789946_SNP	FBgn0085397	Fili	INTRON	9.827e-06
1	C	3L_5711860_SNP	FBgn0085447	sif	INTRON	3.548e-06
1	C	2R_18899287_SNP	FBgn0261705	CG42741	UTR_3_PRIME	5.097e-06
1	C	2L_17806199_SNP	FBgn0262018	CadN2	INTRON	4.234e-08
1	C	2L_17799501_SNP	FBgn0262018	CadN2	SYNONYMOUS_CODING	4.706e-06
1	C	2L_17798166_SNP	FBgn0262018	CadN2	SYNONYMOUS_CODING	3.556e-06
1	C	3R_10582196_SNP	FBgn0263929	jvl	INTRON	8.947e-06
1	C	2L_9264520_SNP	FBgn0263984	CG43733	INTRON	1.291e-05
1	C	X_1797431_DEL	FBgn0264446	CR43864	EXON	9.476e-06
1	C	3R_2248710_SNP	FBgn0264495	gpp	INTRON	1.229e-05
1	C	3R_12658248_SNP	FBgn0264857	iab-8	INTRON	1.405e-05
5	C	2L_15124366_SNP	|||			1.24e-07
5	C	2L_9467050_SNP	|||			2.37e-07
5	C	3R_2706221_SNP	|||			1.73e-07
5	C	2R_10529867_SNP	|||			3.22e-07
5	C	2L_9668716_SNP	|||			7.79e-07
5	C	2L_15100020_SNP	|||			1.61e-06
5	C	2L_15124338_SNP	|||			1.01e-06
5	C	3R_1967895_SNP	|||			8.79e-07
5	C	2L_1321151_SNP	|||			2.07e-06
5	C	3L_623347_SNP	|||			2.92e-06
5	C	3L_14152650_SNP	|||			2.52e-06
5	C	3L_22009991_SNP	|||			4.46e-06
5	C	3L_18851520_SNP	|||			5.36e-06
5	C	2L_14436795_SNP	|||			3.41e-06
5	C	2R_6832569_SNP	|||			6.14e-06
5	C	3L_14092589_SNP	|||			1.06e-05
5	C	2L_3251421_SNP	|||			4.89e-06
5	C	2L_14790095_DEL	|||			1.71e-05
5	C	3L_22009967_SNP	|||			5.66e-06
5	C	3L_18410489_SNP	|||			5.01e-06
5	C	3L_22003667_SNP	|||			5.18e-06
5	C	3R_2844723_SNP	|||			6.53e-06
5	C	2L_17460592_SNP	FBgn0000183	BicD	DOWNSTREAM	7.99e-06
5	C	2L_17460588_INS	FBgn0000183	BicD	DOWNSTREAM	8.22e-06
5	C	X_19461316_SNP	FBgn0000257	car	SYNONYMOUS_CODING	8.79e-06
5	C	2L_18865715_SNP	FBgn0003896	tup	INTRON	1.17e-07
5	C	2R_17242255_SNP	FBgn0000395	cv-2	DOWNSTREAM	1.07e-06
5	C	2R_17242258_SNP	FBgn0000395	cv-2	DOWNSTREAM	1.08e-06
5	C	2L_19676638_SNP	FBgn0000464	Lar	INTRON	5.04e-06
5	C	2L_19678287_SNP	FBgn0000464	Lar	INTRON	4.99e-06
5	C	2L_19682939_SNP	FBgn0000464	Lar	INTRON	4.99e-06
5	C	2L_19595369_SNP	FBgn0000464	Lar	INTRON	1.23e-05
5	C	2L_4077009_SNP	FBgn0000547	ed	INTRON	8.2e-06
5	C	2R_9550693_SNP	FBgn0000633	fas	INTRON	8.22e-06
5	C	2L_9453764_SNP	FBgn0002973	numb	INTRON	2.24e-06
5	C	2L_14642375_SNP	FBgn0003016	osp	INTRON	2.4e-06
5	C	X_2585016_SNP	FBgn0003068	per	SYNONYMOUS_CODING	1.44e-05
5	C	2R_3074376_SNP	FBgn0003090	pk	INTRON	7.26e-07
5	C	2R_3068502_SNP	FBgn0003090	pk	INTRON	1.11e-06
5	C	2R_3074307_SNP	FBgn0003090	pk	INTRON	1.8e-06
5	C	2R_3074979_SNP	FBgn0003090	pk	INTRON	7.78e-06
5	C	2R_3072386_SNP	FBgn0003090	pk	INTRON	6.3e-06
5	C	3L_1364528_SNP	FBgn0003138	Ptp61F	INTRON	6.78e-06
5	C	2L_1061418_SNP	FBgn0003310	S	SYNONYMOUS_CODING	7.73e-07
5	C	2L_1058162_DEL	FBgn0003310	S	INTRON	1.48e-05
5	C	2R_15484679_SNP	FBgn0003435	sm	INTRON	1.19e-05
5	C	2R_15484702_SNP	FBgn0003435	sm	INTRON	1.19e-05
5	C	2R_15484703_SNP	FBgn0003435	sm	INTRON	1.19e-05
5	C	X_13124674_SNP	FBgn0004456	mew	INTRON	4.71e-06
5	C	X_13124649_SNP	FBgn0004456	mew	INTRON	6.01e-06
5	C	3L_22041217_SNP	FBgn0004514	Oct-TyrR	INTRON	5.56e-06
5	C	3L_19682448_SNP	FBgn0004623	Gbeta76C	SYNONYMOUS_CODING	1.15e-06
5	C	3L_21253627_SNP	FBgn0004865	Eip78C	INTRON	1.2e-07
5	C	3L_10974208_SNP	FBgn0013469	klu	DOWNSTREAM	2.79e-06
5	C	2R_3018330_SNP	FBgn0015039	Cyp9b2	SYNONYMOUS_CODING	7.46e-06
5	C	2L_5926729_SNP	FBgn0015381	dsf	INTRON	4.37e-06
5	C	2L_5928407_SNP	FBgn0015381	dsf	INTRON	1.05e-05
5	C	3R_25916441_SNP	FBgn0015542	sima	INTRON	8.55e-06
5	C	3L_19180874_SNP	FBgn0016797	fz2	INTRON	5.99e-06
5	C	3L_19180875_SNP	FBgn0016797	fz2	INTRON	5.29e-06
5	C	3L_19180885_SNP	FBgn0016797	fz2	INTRON	5.29e-06
5	C	2L_13901197_SNP	FBgn0019890	Smg5	SYNONYMOUS_CODING	1.3e-06
5	C	2R_16811758_DEL	FBgn0020617	Rx	INTRON	3.63e-06
5	C	2R_16810295_SNP	FBgn0020617	Rx	SYNONYMOUS_CODING	7.15e-06
5	C	3L_12411005_SNP	FBgn0020655	Gap69C	UPSTREAM	2.33e-07
5	C	3R_9197801_DEL	FBgn0023495	Lip3	UPSTREAM	1.85e-06
5	C	3L_1003196_DEL	FBgn0024277	trio	INTRON	1.53e-06
5	C	2L_7448917_SNP	FBgn0025697	santa-maria	INTRON	1.5e-05
5	C	3L_3892819_SNP	FBgn0026592	Fie	START_GAINED	4.59e-07
5	C	3R_25854927_SNP	FBgn0026597	Axn	INTRON	7.6e-06
5	C	3R_25857064_SNP	FBgn0026597	Axn	SYNONYMOUS_CODING	1.37e-05
5	C	3R_25850094_SNP	FBgn0026597	Axn	INTRON	1.3e-05
5	C	3L_21962842_SNP	FBgn0029091	CS-2	UTR_3_PRIME	1.81e-06
5	C	X_16867710_SNP	FBgn0030810	CG9059	SYNONYMOUS_CODING	2.63e-06
5	C	X_18066571_SNP	FBgn0030897	Frq1	UTR_3_PRIME	2.32e-06
5	C	X_18065958_SNP	FBgn0030897	Frq1	UTR_3_PRIME	2.86e-06
5	C	X_20938898_SNP	FBgn0031150	bves	INTRON	7.19e-07
5	C	X_20945383_SNP	FBgn0031150	bves	INTRON	3.46e-06
5	C	X_20936141_SNP	FBgn0031150	bves	INTRON	3.8e-06
5	C	X_20936725_SNP	FBgn0031150	bves	INTRON	1.11e-05
5	C	2L_1150585_SNP	FBgn0031309	Tfb4	INTRON	1.63e-06
5	C	2L_10026729_SNP	FBgn0032176	CG13127	UPSTREAM	3.4e-06
5	C	2L_10026720_DEL	FBgn0032176	CG13127	UPSTREAM	3.26e-06
5	C	2L_10529499_SNP	FBgn0032264	Lip4	INTRON	6.62e-06
5	C	2L_13955322_SNP	FBgn0032536	Ance-3	SYNONYMOUS_CODING	2.78e-06
5	C	2L_16846383_SNP	FBgn0032614	CG13284	INTRON	9.46e-06
5	C	2L_18834177_SNP	FBgn0032717	CG10600	DOWNSTREAM	1.15e-05
5	C	2L_18923274_SNP	FBgn0032723	ssp3	INTRON	9.74e-06
5	C	2R_5551232_SNP	FBgn0033438	Mmp2	INTRON	1.16e-05
5	C	2R_6135265_SNP	FBgn0033499	CG12914	UPSTREAM	2.89e-06
5	C	2R_7328911_SNP	FBgn0033635	CG7777	SYNONYMOUS_CODING	5.22e-06
5	C	2R_7679294_SNP	FBgn0033652	ths	INTRON	2.63e-06
5	C	2R_7679336_SNP	FBgn0033652	ths	INTRON	3.59e-06
5	C	2R_10301344_SNP	FBgn0033935	Sin1	UTR_3_PRIME	1.67e-06
5	C	2R_12509045_SNP	FBgn0034145	CG5065	NON_SYNONYMOUS_CODING	8.37e-06
5	C	2R_17085986_SNP	FBgn0034602	Lapsyn	INTRON	1.12e-05
5	C	3L_747102_SNP	FBgn0035160	CG13897	INTRON	1.03e-05
5	C	3L_1035032_SNP	FBgn0035181	CG9205	INTRON	7.99e-06
5	C	3L_1035369_SNP	FBgn0035181	CG9205	UTR_5_PRIME	1.37e-05
5	C	3L_3001675_SNP	FBgn0035385	FR	UPSTREAM	9.22e-06
5	C	3L_3001816_SNP	FBgn0035385	FR	UPSTREAM	8.44e-06
5	C	3L_4394183_SNP	FBgn0035539	slow	INTRON	8.93e-07
5	C	3L_4401363_SNP	FBgn0035539	slow	INTRON	5.53e-06
5	C	3L_4417369_SNP	FBgn0035542	DOR	INTRON	3.95e-07
5	C	3L_4416900_SNP	FBgn0035542	DOR	INTRON	8.4e-07
5	C	3L_4416208_SNP	FBgn0035542	DOR	INTRON	1.91e-06
5	C	3L_4412294_SNP	FBgn0035542	DOR	INTRON	2.98e-06
5	C	3L_4411648_SNP	FBgn0035542	DOR	INTRON	3.84e-06
5	C	3L_4408282_SNP	FBgn0035542	DOR	INTRON	9.43e-06
5	C	3L_4413195_SNP	FBgn0035542	DOR	INTRON	9.6e-06
5	C	3L_4411315_SNP	FBgn0035542	DOR	INTRON	9.15e-06
5	C	3L_5491280_SNP	FBgn0035608	blanks	SYNONYMOUS_CODING	1.04e-05
5	C	3L_6604653_SNP	FBgn0035708	CG8398	INTRON	1.35e-06
5	C	3L_7319042_SNP	FBgn0035762	CG8605	INTRON	1.82e-06
5	C	3L_8955283_SNP	FBgn0035942	CG5660	INTRON	1.2e-05
5	C	3L_8955313_SNP	FBgn0035942	CG5660	NON_SYNONYMOUS_CODING	1.35e-05
5	C	3L_8955326_SNP	FBgn0035942	CG5660	NON_SYNONYMOUS_CODING	1.35e-05
5	C	3L_9230633_SNP	FBgn0035970	CG4483	UPSTREAM	2.91e-06
5	C	3L_9535396_SNP	FBgn0036010	Ir67a	NON_SYNONYMOUS_CODING	7.84e-06
5	C	3L_12335667_SNP	FBgn0036278	GRHRII	SYNONYMOUS_CODING	1.12e-05
5	C	3L_12520476_SNP	FBgn0036298	nst	UTR_3_PRIME	8.22e-06
5	C	3L_13007243_SNP	FBgn0036333	MICAL-like	NON_SYNONYMOUS_CODING	9.22e-06
5	C	3L_14544617_SNP	FBgn0036428	CG9238	UPSTREAM	1.2e-05
5	C	3L_15996950_SNP	FBgn0036556	CG5830	INTRON	6.31e-07
5	C	3L_15996133_SNP	FBgn0036556	CG5830	INTRON	7.83e-06
5	C	3L_18155807_SNP	FBgn0036781	CG13699	UPSTREAM	1.02e-06
5	C	3L_18155959_SNP	FBgn0036781	CG13699	UPSTREAM	9.8e-06
5	C	3L_19616069_SNP	FBgn0036895	CG9392	SYNONYMOUS_CODING	1.17e-05
5	C	3L_19618371_SNP	FBgn0036896	wnd	DOWNSTREAM	2.19e-06
5	C	3L_20244293_SNP	FBgn0036960	CG13814	INTRON	7.52e-07
5	C	3R_9494312_SNP	FBgn0038165	Task6	UTR_3_PRIME	8.42e-06
5	C	3L_12960532_SNP	FBgn0041622	Or69a	NON_SYNONYMOUS_CODING	1.36e-05
5	C	2R_7550884_SNP	FBgn0044020	Roc2	INTRON	1.62e-05
5	C	2L_10602733_SNP	FBgn0051721	Trim9	INTRON	4.7e-06
5	C	2L_10547036_SNP	FBgn0051721	Trim9	INTRON	7.24e-06
5	C	3L_5177435_SNP	FBgn0052423	shep	INTRON	5.6e-08
5	C	3L_5178242_SNP	FBgn0052423	shep	INTRON	5.05e-08
5	C	3L_5184658_SNP	FBgn0052423	shep	INTRON	1.15e-05
5	C	3L_5184891_SNP	FBgn0052423	shep	INTRON	1.15e-05
5	C	3L_5184906_SNP	FBgn0052423	shep	INTRON	1.15e-05
5	C	2L_2067860_SNP	FBgn0053516	dpr3	INTRON	8.92e-06
5	C	X_20969348_SNP	FBgn0064123	stg1	INTRON	3.51e-07
5	C	X_20641766_SNP	FBgn0085387	shakB	DOWNSTREAM	3.17e-06
5	C	2R_10216807_SNP	FBgn0085408	Shroom	SYNONYMOUS_CODING	1.1e-05
5	C	2L_18665482_SNP	FBgn0086200	CG42490	INTRON	6.44e-06
5	C	X_6402103_SNP	FBgn0259242	CG42340	INTRON	5.32e-08
5	C	X_6402098_DEL	FBgn0259242	CG42340	INTRON	7.45e-08
5	C	3L_7445106_SNP	FBgn0259935	CG42458	INTRON	6.79e-06
5	C	3R_2811760_SNP	FBgn0260642	Antp	INTRON	6.03e-06
5	C	3L_7002277_SNP	FBgn0260660	mp	INTRON	8.3e-07
5	C	3L_12206632_SNP	FBgn0260941	app	INTRON	7.31e-06
5	C	3L_12207964_SNP	FBgn0260941	app	INTRON	7.31e-06
5	C	3L_12211029_SNP	FBgn0260941	app	INTRON	7.31e-06
5	C	3L_12207965_SNP	FBgn0260941	app	INTRON	8.19e-06
5	C	3L_12203246_SNP	FBgn0260941	app	INTRON	1.03e-05
5	C	2L_3670446_SNP	FBgn0261054	Sfp24Bc	INTRON	1.24e-05
5	C	2L_13959098_SNP	FBgn0261514	nimA	INTRON	1.09e-06
5	C	3L_20162751_SNP	FBgn0261556	CG42674	INTRON	1.11e-07
5	C	2L_5113111_SNP	FBgn0261836	Msp-300	INTRON	6.3e-06
5	C	3L_387476_SNP	FBgn0262139	trh	INTRON	4.8e-06
5	C	3L_387478_MNP	FBgn0262139	trh	INTRON	4.64e-06
5	C	3L_21901406_SNP	FBgn0262737	mub	INTRON	2.26e-06
5	C	3L_21853842_SNP	FBgn0262737	mub	INTRON	3.1e-06
5	C	2R_2117044_SNP	FBgn0263144	bin3	INTRON	5.65e-06
5	C	2R_2117176_SNP	FBgn0263144	bin3	INTRON	5.65e-06
5	C	2R_2116377_SNP	FBgn0263144	bin3	INTRON	6.56e-06
5	C	3L_16003440_INS	FBgn0263601	mib1	INTRON	2.7e-06
5	C	3L_8848125_SNP	FBgn0263930	dally	INTRON	3.37e-06
5	C	2R_3009959_SNP	FBgn0263934	esn	INTRON	4.51e-06
5	C	2R_3009182_SNP	FBgn0263934	esn	INTRON	6.86e-06
5	C	2R_3010214_SNP	FBgn0263934	esn	INTRON	8.25e-06
5	C	3R_13793867_SNP	FBgn0263995	cpo	INTRON	5.3e-06
5	C	3R_13793879_SNP	FBgn0263995	cpo	INTRON	5.53e-06
5	C	3R_13793877_SNP	FBgn0263995	cpo	INTRON	7.96e-06
5	C	3L_394542_SNP	FBgn0264700	CR43969	DOWNSTREAM	1.13e-06
5	C	3R_25860575_SNP	FBgn0264837	CR44045	EXON	1.37e-05
5	C	3L_7183392_SNP	FBgn0265296	Dscam2	UPSTREAM	1.07e-05
5	C	2R_4165908_SNP	FBgn0265307	CR44280	DOWNSTREAM	3.22e-06
5	C	2R_4165612_SNP	FBgn0265307	CR44280	DOWNSTREAM	1.33e-05
5	C	2L_12080933_SNP				7.3e-06
5	C	2L_9354241_SNP				1.31e-05
5	C	2L_11687269_SNP				8.19e-06
5	C	3L_21991927_SNP				7e-06
5	C	3L_728265_SNP				8.44e-06
5	C	X_20561220_SNP				8.23e-06
5	C	3L_9239522_DEL				5e-06
5	C	3L_18399692_SNP				9.17e-06
5	C	3L_730116_SNP				7.63e-06
5	C	3L_3677793_SNP				4.65e-06
5	C	2R_14092703_SNP				9.12e-06
5	C	3R_26047809_SNP				8.13e-06
5	C	3R_2707658_SNP				7.22e-06
5	C	X_20561258_SNP				1.15e-05
5	C	3L_728191_SNP				1.03e-05
5	C	3L_9239519_SNP				7.57e-06
5	C	3L_15177321_SNP				9.31e-06
5	C	X_20561285_SNP				1.28e-05
5	C	3L_429310_SNP				1.06e-05
5	C	3L_729542_SNP				1.1e-05
5	C	2R_10524993_INS				9.93e-06
5	C	X_19980120_SNP				1.08e-05
5	C	2R_17694342_SNP				1.63e-05
5	C	2R_17694350_SNP				1.63e-05
5	C	3R_2709189_SNP				8.84e-06
5	C	X_20561262_SNP				1.28e-05
5	C	3L_14152529_SNP				1.14e-05
5	C	3L_729804_SNP				1.18e-05
5	C	2R_10529834_SNP				7.48e-06
5	C	3L_10367363_SNP				1.38e-05
5	C	3R_2709431_SNP				9.86e-06
5	C	3R_2850776_SNP				1.29e-05
5	C	X_20561193_SNP				1.14e-05
1	L	3L_15504392_SNP	FBgn0000565	Eip71CD	INTRON	2.93e-07
1	L	3L_15504415_DEL	FBgn0000565	Eip71CD	INTRON	3.12e-07
1	L	3L_15504358_SNP	FBgn0000565	Eip71CD	INTRON	5.72e-06
1	L	2R_18434571_SNP	FBgn0003175	px	INTRON	1.41e-05
1	L	2R_19525497_SNP	FBgn0004795	retn	INTRON	8.32e-06
1	L	3L_1090136_SNP	FBgn0004870	bab1	INTRON	2.19e-05
1	L	3L_6097019_SNP	FBgn0005658	Ets65A	INTRON	2.03e-06
1	L	3R_26872843_SNP	FBgn0010015	CanA1	DOWNSTREAM	5.53e-06
1	L	3R_26871365_SNP	FBgn0010015	CanA1	INTRON	7.62e-06
1	L	3R_26871176_SNP	FBgn0010015	CanA1	INTRON	8.57e-06
1	L	3R_26870989_SNP	FBgn0010015	CanA1	INTRON	7.23e-06
1	L	3R_26871052_DEL	FBgn0010015	CanA1	INTRON	8.51e-06
1	L	3R_26872447_SNP	FBgn0010015	CanA1	UTR_3_PRIME	8.21e-06
1	L	3R_26871306_SNP	FBgn0010015	CanA1	INTRON	9.19e-06
1	L	3R_26871309_SNP	FBgn0010015	CanA1	INTRON	9.19e-06
1	L	2R_5115029_INS	FBgn0010114	hig	DOWNSTREAM	1.77e-06
1	L	3R_2206262_SNP	FBgn0010282	TfIIFalpha	UTR_5_PRIME	1.5e-06
1	L	2R_15129720_SNP	FBgn0010434	cora	SYNONYMOUS_CODING	2.86e-06
1	L	3L_2572860_SNP	FBgn0010909	msn	INTRON	7.38e-06
1	L	3L_10261057_SNP	FBgn0011569	can	UPSTREAM	7.3e-06
1	L	3R_1297920_SNP	FBgn0011715	Snr1	NON_SYNONYMOUS_CODING	8.2e-08
1	L	3R_1297119_SNP	FBgn0011715	Snr1	INTRON	5.44e-08
1	L	3R_1296823_SNP	FBgn0011715	Snr1	SYNONYMOUS_CODING	3.61e-06
1	L	3L_10991399_SNP	FBgn0013469	klu	INTRON	2.69e-06
1	L	3R_1120202_SNP	FBgn0013576	mtd	SYNONYMOUS_CODING	2.53e-06
1	L	3R_1121849_SNP	FBgn0013576	mtd	INTRON	3e-06
1	L	3R_1129679_SNP	FBgn0013576	mtd	INTRON	3e-06
1	L	3L_1752750_SNP	FBgn0022702	Cht2	SYNONYMOUS_CODING	2.09e-06
1	L	X_1801269_SNP	FBgn0023511	Edem1	SYNONYMOUS_CODING	2.17e-07
1	L	X_1799900_SNP	FBgn0023511	Edem1	SYNONYMOUS_CODING	3.06e-07
1	L	X_1798372_SNP	FBgn0023511	Edem1	INTRON	5.85e-07
1	L	X_1798301_SNP	FBgn0023511	Edem1	DOWNSTREAM	4.08e-06
1	L	3R_24522280_SNP	FBgn0027655	htt	INTRON	3.43e-07
1	L	3R_24534116_SNP	FBgn0027655	htt	INTRON	4.37e-06
1	L	X_7995298_SNP	FBgn0029997	CG2258	UTR_5_PRIME	3.42e-06
1	L	2L_6446129_SNP	FBgn0031813	CG9527	SYNONYMOUS_CODING	2.59e-05
1	L	2L_16493569_SNP	FBgn0032586	Tpr2	INTRON	2.94e-05
1	L	2R_3841980_SNP	FBgn0033236	CG14764	INTRON	7.06e-06
1	L	2R_4356187_SNP	FBgn0033296	Mal-A7	DOWNSTREAM	6.1e-06
1	L	2R_5212477_SNP	FBgn0033403	CG13739	INTRON	9.71e-06
1	L	2R_11879749_SNP	FBgn0034058	Pex11	NON_SYNONYMOUS_CODING	9.26e-07
1	L	2R_13496603_SNP	FBgn0034253	CG10936	SYNONYMOUS_CODING	4.79e-06
1	L	2R_17126498_SNP	FBgn0034606	ASPP	INTRON	9.62e-07
1	L	2R_17709432_SNP	FBgn0034662	CG13492	SYNONYMOUS_CODING	2.01e-05
1	L	3L_8915654_SNP	FBgn0035936	Tsp66E	INTRON	8.9e-06
1	L	3L_9204262_SNP	FBgn0035969	CG4476	UPSTREAM	3.29e-06
1	L	3L_13482978_SNP	FBgn0036373	CG10741	INTRON	1.18e-05
1	L	3L_13506826_SNP	FBgn0036376	Liprin-beta	SYNONYMOUS_CODING	9.62e-07
1	L	3L_15591491_SNP	FBgn0036518	RhoGAP71E	INTRON	5.52e-05
1	L	3L_16299771_SNP	FBgn0036601	CG13063	INTRON	1.74e-05
1	L	3L_16300831_SNP	FBgn0036602	CG13042	DOWNSTREAM	1.75e-06
1	L	3L_16300822_SNP	FBgn0036602	CG13042	DOWNSTREAM	3.34e-06
1	L	3L_16300839_SNP	FBgn0036602	CG13042	DOWNSTREAM	8.18e-06
1	L	3R_1060052_SNP	FBgn0037301	Mms19	NON_SYNONYMOUS_CODING	2.67e-06
1	L	3R_1252838_SNP	FBgn0037325	CG12147	NON_SYNONYMOUS_CODING	2.94e-08
1	L	3R_1251661_SNP	FBgn0037325	CG12147	SYNONYMOUS_CODING	9.99e-06
1	L	3R_1279608_SNP	FBgn0037326	CG14669	INTRON	5.44e-07
1	L	3R_1283377_INS	FBgn0037326	CG14669	DOWNSTREAM	3.06e-06
1	L	3R_1283380_INS	FBgn0037326	CG14669	DOWNSTREAM	3.06e-06
1	L	3R_1279701_SNP	FBgn0037326	CG14669	INTRON	4.96e-06
1	L	3R_1260224_SNP	FBgn0037326	CG14669	INTRON	2.48e-06
1	L	3R_1264677_SNP	FBgn0037326	CG14669	INTRON	2.15e-06
1	L	3R_1264680_SNP	FBgn0037326	CG14669	INTRON	2.23e-06
1	L	3R_1289892_SNP	FBgn0037327	PEK	INTRON	3.03e-09
1	L	3R_1287165_SNP	FBgn0037327	PEK	NON_SYNONYMOUS_CODING	2.22e-08
1	L	3R_1284830_SNP	FBgn0037327	PEK	UTR_3_PRIME	4.49e-07
1	L	3R_1285579_SNP	FBgn0037327	PEK	SYNONYMOUS_CODING	3e-06
1	L	3R_1287839_SNP	FBgn0037327	PEK	NON_SYNONYMOUS_CODING	1.5e-05
1	L	3R_1291334_SNP	FBgn0037328	RpL35A	DOWNSTREAM	1.1e-07
1	L	3R_1292660_SNP	FBgn0037328	RpL35A	INTRON	1.99e-07
1	L	3R_1293685_SNP	FBgn0037329	CG12162	UTR_5_PRIME	6.35e-07
1	L	3R_1293243_SNP	FBgn0037329	CG12162	UPSTREAM	8.3e-06
1	L	3R_1295688_SNP	FBgn0037330	mRpL44	SYNONYMOUS_CODING	9.3e-09
1	L	3R_1300822_SNP	FBgn0037332	Hcs	UTR_5_PRIME	2.79e-07
1	L	3R_1306351_SNP	FBgn0037332	Hcs	INTRON	2.73e-06
1	L	3R_1310115_SNP	FBgn0037332	Hcs	SYNONYMOUS_CODING	4e-06
1	L	3R_1645087_SNP	FBgn0037382	Hpr1	SYNONYMOUS_CODING	9.47e-06
1	L	3R_2222911_SNP	FBgn0037443	CG1021	INTRON	6.65e-06
1	L	3R_5450762_SNP	FBgn0037720	CG8312	UTR_3_PRIME	3.69e-06
1	L	3R_7256343_SNP	FBgn0037898	CG18643	INTRON	3.63e-07
1	L	3R_7256598_SNP	FBgn0037899	RpL24-like	NON_SYNONYMOUS_CODING	1.68e-06
1	L	3R_7261004_SNP	FBgn0037901	CG6744	NON_SYNONYMOUS_CODING	8.78e-06
1	L	3R_10987515_SNP	FBgn0038295	Gyc88E	INTRON	5.06e-07
1	L	3R_22303962_SNP	FBgn0039431	CG6490	INTRON	7.43e-06
1	L	3R_24518766_SNP	FBgn0039594	CG9990	INTRON	1.14e-07
1	L	3R_24518538_SNP	FBgn0039594	CG9990	INTRON	8.71e-07
1	L	3R_24518539_SNP	FBgn0039594	CG9990	INTRON	8.71e-07
1	L	3R_24519663_SNP	FBgn0039594	CG9990	INTRON	7.13e-06
1	L	3R_24519016_SNP	FBgn0039594	CG9990	INTRON	1.07e-05
1	L	3R_24822787_SNP	FBgn0039620	CG1443	INTRON	5.45e-08
1	L	3R_24822508_SNP	FBgn0039620	CG1443	INTRON	4.59e-08
1	L	3R_24820754_SNP	FBgn0039620	CG1443	SYNONYMOUS_CODING	9.88e-07
1	L	3R_24822865_SNP	FBgn0039620	CG1443	INTRON	4.02e-06
1	L	3L_16252542_SNP	FBgn0040801	CG13053	UTR_5_PRIME	1.54e-07
1	L	3R_2130834_SNP	FBgn0051561	Osi16	UPSTREAM	1.14e-05
1	L	3R_26870330_SNP	FBgn0053920	CG33920	NON_SYNONYMOUS_CODING	4.53e-06
1	L	3R_26870500_SNP	FBgn0053920	CG33920	NON_SYNONYMOUS_CODING	6.87e-06
1	L	3R_26870374_SNP	FBgn0053920	CG33920	SYNONYMOUS_CODING	8.98e-06
1	L	3R_1726662_SNP	FBgn0083949	CG34113	INTRON	1.81e-06
1	L	3R_1705342_SNP	FBgn0083949	CG34113	INTRON	1.99e-06
1	L	3L_7145947_SNP	FBgn0259173	corn	INTRON	5.5e-06
1	L	2L_16610446_SNP	FBgn0259735	CG42389	INTRON	9.37e-06
1	L	3R_1067910_SNP	FBgn0260462	CG12163	DOWNSTREAM	3.13e-06
1	L	3L_21409054_SNP	FBgn0261258	rgn	INTRON	0.0001421
1	L	2R_18899287_SNP	FBgn0261705	CG42741	UTR_3_PRIME	3.74e-06
1	L	3R_10947861_SNP	FBgn0261859	CG42788	INTRON	2.81e-06
1	L	2L_17806199_SNP	FBgn0262018	CadN2	INTRON	7.93e-06
1	L	X_1797431_DEL	FBgn0264446	CR43864	EXON	1.25e-07
1	L	X_1797459_DEL	FBgn0264446	CR43864	EXON	4.45e-06
1	L	3R_2260376_SNP	FBgn0264495	gpp	INTRON	2.93e-07
1	L	3R_2248710_SNP	FBgn0264495	gpp	INTRON	2.42e-06
1	L	3R_2248807_SNP	FBgn0264495	gpp	INTRON	1.98e-06
1	L	3R_2248695_SNP	FBgn0264495	gpp	INTRON	2.62e-06
1	L	3R_12658248_SNP	FBgn0264857	iab-8	INTRON	4.63e-06
1	L	3L_10343750_SNP	FBgn0265415	CR44327	INTRON	1.24e-06
1	L	2R_18855643_SNP				1.15e-06
1	L	2R_17693199_SNP				3.73e-06
1	L	2R_17693230_SNP				2.77e-06
1	L	3L_11252214_SNP				1.81e-06
1	L	2R_18860769_SNP				2.67e-06
1	L	2L_16864941_SNP				1.98e-05
1	L	3R_15192839_SNP				5.75e-05
1	L	2R_18867093_SNP				1.32e-05
1	L	3R_13902257_SNP				4.95e-06
1	L	2R_18863015_SNP				1.1e-05
1	L	3R_7303305_SNP				2.45e-05
1	L	2L_4232146_SNP				1.38e-05
1	L	2L_4232148_SNP				1.38e-05
1	L	3R_15192779_SNP				4.47e-05
1	L	2R_18855712_DEL				5.9e-06
1	L	3L_15766850_SNP				3.4e-06
1	L	2R_1687881_SNP				7.3e-06
1	L	2R_1687822_SNP				8.98e-06
1	L	2R_1687832_SNP				9.93e-06
5	L	2L_17470364_SNP	FBgn0000183	BicD	INTRON	1.07e-05
5	L	2R_9550693_SNP	FBgn0000633	fas	INTRON	1.19e-05
5	L	3R_17142885_SNP	FBgn0001234	Hsromega	EXON	1.09e-05
5	L	3R_17142517_SNP	FBgn0001234	Hsromega	EXON	5.27e-06
5	L	3R_17142781_SNP	FBgn0001234	Hsromega	EXON	3.92e-06
5	L	3R_17142739_SNP	FBgn0001234	Hsromega	EXON	2.62e-06
5	L	3R_17142576_SNP	FBgn0001234	Hsromega	EXON	4.97e-06
5	L	3R_17142534_SNP	FBgn0001234	Hsromega	EXON	5.63e-06
5	L	2L_7379041_SNP	FBgn0002938	ninaC	SYNONYMOUS_CODING	2.35e-06
5	L	2L_9453764_SNP	FBgn0002973	numb	INTRON	2.93e-05
5	L	3L_21253627_SNP	FBgn0004865	Eip78C	INTRON	1.49e-06
5	L	2L_8701419_SNP	FBgn0004914	Hnf4	INTRON	1.08e-05
5	L	3L_8454729_SNP	FBgn0010825	Gug	INTRON	1.92e-08
5	L	2L_14425847_SNP	FBgn0028871	Cpr35B	UPSTREAM	6.99e-08
5	L	X_8299253_SNP	FBgn0030035	CG11190	SYNONYMOUS_CODING	3.85e-05
5	L	X_20938898_SNP	FBgn0031150	bves	INTRON	8.59e-06
5	L	2R_12509045_SNP	FBgn0034145	CG5065	NON_SYNONYMOUS_CODING	5.91e-06
5	L	3L_2328425_SNP	FBgn0035331	DmsR-1	INTRON	1.22e-05
5	L	3L_4394183_SNP	FBgn0035539	slow	INTRON	1.56e-06
5	L	3L_4688618_SNP	FBgn0035567	CG7514	SYNONYMOUS_CODING	2.4e-05
5	L	3L_7459855_SNP	FBgn0035786	Tsp66A	INTRON	9.63e-06
5	L	3L_9535396_SNP	FBgn0036010	Ir67a	NON_SYNONYMOUS_CODING	6.66e-07
5	L	3L_22706140_SNP	FBgn0037181	CG11370	NON_SYNONYMOUS_CODING	1.79e-05
5	L	2L_7459166_SNP	FBgn0045495	Gr28b	INTRON	3.98e-05
5	L	3R_2550742_SNP	FBgn0051481	pb	INTRON	4.05e-05
5	L	X_20969348_SNP	FBgn0064123	stg1	INTRON	5.49e-06
5	L	X_20687828_SNP	FBgn0085387	shakB	INTRON	1.13e-06
5	L	2L_3372585_SNP	FBgn0085423	CG34394	INTRON	0.000103
5	L	X_6402103_SNP	FBgn0259242	CG42340	INTRON	2.01e-05
5	L	X_6402098_DEL	FBgn0259242	CG42340	INTRON	1.89e-05
5	L	3L_7444737_SNP	FBgn0259935	CG42458	INTRON	4.03e-06
5	L	3L_7442707_SNP	FBgn0259935	CG42458	INTRON	8.08e-06
5	L	3L_7442722_SNP	FBgn0259935	CG42458	INTRON	9.2e-06
5	L	3R_2811760_SNP	FBgn0260642	Antp	INTRON	1.04e-05
5	L	3R_2739484_SNP	FBgn0260642	Antp	INTRON	1.34e-05
5	L	3R_2740508_SNP	FBgn0260642	Antp	INTRON	1.38e-05
5	L	3R_2739833_SNP	FBgn0260642	Antp	INTRON	1.75e-05
5	L	2L_3670446_SNP	FBgn0261054	Sfp24Bc	INTRON	9.04e-06
5	L	3R_2944832_SNP	FBgn0261238	Alh	INTRON	1.45e-05
5	L	3R_10659555_SNP	FBgn0264754	btsz	INTRON	5.58e-06
5	L	3L_2998427_SNP				3.15e-07
5	L	3R_1967895_SNP				4.12e-06
5	L	3R_25192358_SNP				4.72e-06
5	L	3L_2999056_SNP				2.9e-06
5	L	2R_15935444_SNP				1.23e-05
5	L	3L_7455522_SNP				4.06e-06
5	L	X_6104649_SNP				3.79e-05
5	L	3L_5418361_SNP				5.45e-06
5	L	3L_12717454_SNP				1.8e-05
5	L	2L_12957252_SNP				6.33e-06
5	L	3L_2999052_SNP				6.33e-06
5	L	X_20571210_SNP				3.92e-06

## Sheet: CS candidates shared across age
Candidate genes for climbing speed shared across ages within each treatment
Control					Lisinopril treated
Flybase ID	Gene name				Flybase ID	Gene name
FBgn0015542	sima				NONE

## Sheet: CS candidates shared across trt
Candidate genes for climbing speed shared across treatments within each age
Clmbing speed Week 1						Clmbing speed Week 5
FlyBase ID	Gene Symbol			Flybase ID	Gene name
FBgn0000565	Eip71CD			FBgn0000183	BicD
FBgn0003175	px			FBgn0000633	fas
FBgn0004795	retn			FBgn0002973	numb
FBgn0004870	bab1			FBgn0004865	Eip78C
FBgn0010015	CanA1			FBgn0031150	bves
FBgn0010114	hig			FBgn0034145	CG5065
FBgn0011715	Snr1			FBgn0035539	slow
FBgn0023511	Edem1			FBgn0036010	Ir67a
FBgn0027655	htt			FBgn0064123	stg1
FBgn0029997	CG2258			FBgn0085387	shakB
FBgn0031813	CG9527			FBgn0259242	CG42340
FBgn0033236	CG14764			FBgn0259935	CG42458
FBgn0033296	Mal-A7			FBgn0260642	Antp
FBgn0034606	ASPP			FBgn0261054	Sfp24Bc
FBgn0036376	Liprin-Beta
FBgn0037325	CG12147
FBgn0037326	CG14669
FBgn0037327	PEK
FBgn0037328	RpL35A
FBgn0037329	CG12162
FBgn0037330	mRpL44
FBgn0262018	CadN2
FBgn0039594	CG9990
FBgn0261705	CG42741
FBgn0264446	CR43864
FBgn0264495	gpp
FBgn0264857	iab-8

## Sheet: Endurance (End)
Supplementary Table S4 GWA results for physical performanc.
Output from the DGRP Freeze 2, release ___ analysis pipeline (http://dgrp.gnets.ncsu.edu/). Candidate SNPs associated with age-specific endurance at P < 10-5. C = Control, L = Lisinopril treated
Endurance
Age (Weeks)	Treatment	Chrom/Pos	FlyBase ID	Gene Symbol	Site Class	SNP P-value
1	C	3R_12933323_SNP	FBgn0014141	cher	SYNONYMOUS_CODING	4.25e-06
1	C	2L_12430105_SNP	FBgn0032431	CG5435	SYNONYMOUS_CODING	1.13e-05
1	C	3R_14045925_SNP	FBgn0038583	CG7183	SYNONYMOUS_CODING	2.89e-06
1	C	2R_906244_SNP	FBgn0040849	Ir41a	INTRON	2.14e-06
1	C	3R_26470169_SNP	FBgn0051013	CG31013	INTRON	3.45e-07
1	C	3R_26469967_SNP	FBgn0051013	CG31013	INTRON	3.01e-07
1	C	3R_26468899_SNP	FBgn0051013	CG31013	DOWNSTREAM	7.64e-07
1	C	3R_26470279_SNP	FBgn0051013	CG31013	SYNONYMOUS_CODING	1.49e-06
1	C	X_10463425_SNP	FBgn0085443	spri	INTRON	8.12e-06
1	C	3L_5742867_SNP	FBgn0085447	sif	DOWNSTREAM	3.22e-06
1	C	3L_5742903_SNP	FBgn0085447	sif	DOWNSTREAM	6.93e-06
1	C	X_10881200_SNP	FBgn0259241	CG42339	INTRON	9.09e-06
1	C	3L_2658433_SNP	FBgn0264606	CG43955	INTRON	5.42e-06
1	C	X_20571194_SNP				7.76e-08
1	C	3R_24068525_SNP				6.25e-07
1	C	X_20571199_SNP				1.75e-07
1	C	X_20571220_SNP				3.18e-07
1	C	X_20571225_SNP				3.18e-07
1	C	X_20571195_SNP				3.19e-07
1	C	3L_13145353_SNP				3.1e-06
1	C	3L_13145307_SNP				3.8e-06
1	C	X_20571192_SNP				3.21e-06
1	C	X_20571210_SNP				1.54e-06
1	C	X_20571391_DEL				1.55e-06
1	C	3R_24114971_SNP				1.76e-05
1	C	2L_17056278_SNP				1.16e-05
1	C	3L_4922980_SNP				1.05e-05
1	C	X_20571201_MNP				2.19e-06
1	C	X_20571211_INS				4.07e-06
5	C	3L_8377863_SNP	FBgn0001253	ImpE1	INTRON	7.23e-08
5	C	3L_8379798_SNP	FBgn0001253	ImpE1	NON_SYNONYMOUS_CODING	5.92e-07
5	C	3L_8379799_SNP	FBgn0001253	ImpE1	SYNONYMOUS_CODING	6.37e-07
5	C	3L_8380005_SNP	FBgn0001253	ImpE1	NON_SYNONYMOUS_CODING	5.01e-07
5	C	3L_8377428_SNP	FBgn0001253	ImpE1	INTRON	1.19e-06
5	C	3L_8378366_SNP	FBgn0001253	ImpE1	INTRON	2.82e-06
5	C	3L_8379561_SNP	FBgn0001253	ImpE1	NON_SYNONYMOUS_CODING	8.36e-06
5	C	3L_8374983_SNP	FBgn0001253	ImpE1	INTRON	2.65e-06
5	C	2L_1061920_SNP	FBgn0003310	S	NON_SYNONYMOUS_CODING	7.26e-06
5	C	2L_1058162_DEL	FBgn0003310	S	INTRON	6.55e-06
5	C	2L_1061262_SNP	FBgn0003310	S	SYNONYMOUS_CODING	3.88e-06
5	C	3L_18166475_SNP	FBgn0003997	W	NON_SYNONYMOUS_CODING	6.42e-07
5	C	3L_21255282_SNP	FBgn0004865	Eip78C	INTRON	2.99e-06
5	C	3L_21253931_SNP	FBgn0004865	Eip78C	INTRON	4.82e-06
5	C	3L_10984806_DEL	FBgn0013469	klu	INTRON	4.58e-06
5	C	3L_9655758_SNP	FBgn0016081	fry	INTRON	1.25e-06
5	C	3L_9655763_SNP	FBgn0016081	fry	INTRON	1.53e-06
5	C	3R_9786134_SNP	FBgn0016672	Ipp	UTR_3_PRIME	8.77e-06
5	C	3L_12411005_SNP	FBgn0020655	Gap69C	UPSTREAM	4.45e-06
5	C	2R_16954770_DEL	FBgn0022700	Cht4	UPSTREAM	3.96e-06
5	C	3L_13251896_SNP	FBgn0023095	caps	INTRON	9.22e-06
5	C	3L_13231487_SNP	FBgn0023095	caps	INTRON	9.18e-06
5	C	X_16737118_SNP	FBgn0024941	RSG7	INTRON	2.04e-06
5	C	X_16737136_SNP	FBgn0024941	RSG7	INTRON	7.11e-06
5	C	X_12395843_SNP	FBgn0030396	CG2556	INTRON	9.28e-06
5	C	X_21848777_SNP	FBgn0031183	CG14621	SYNONYMOUS_CODING	1.6e-06
5	C	2L_6484832_SNP	FBgn0031820	DLP	NON_SYNONYMOUS_CODING	1.3e-06
5	C	2L_8131794_SNP	FBgn0031988	CG8668	SYNONYMOUS_CODING	1.48e-07
5	C	2L_8129536_SNP	FBgn0031988	CG8668	INTRON	2.52e-06
5	C	2L_8132028_SNP	FBgn0031988	CG8668	SYNONYMOUS_CODING	6.24e-07
5	C	2L_8130921_SNP	FBgn0031988	CG8668	INTRON	9.72e-07
5	C	2L_8130409_SNP	FBgn0031988	CG8668	INTRON	1.06e-06
5	C	2L_8131935_MNP	FBgn0031988	CG8668	INTRON	5.17e-06
5	C	2L_8130627_SNP	FBgn0031988	CG8668	INTRON	8.14e-06
5	C	2L_8136459_SNP	FBgn0031990	CG8552	SYNONYMOUS_CODING	3.93e-06
5	C	2L_8312824_SNP	FBgn0032018	CG7806	SYNONYMOUS_CODING	2.03e-05
5	C	2L_9077091_SNP	FBgn0032094	CG12439	UPSTREAM	7.64e-05
5	C	2L_18938333_SNP	FBgn0032723	ssp3	INTRON	7.74e-08
5	C	2L_18939130_SNP	FBgn0032723	ssp3	INTRON	1.52e-07
5	C	2L_18926292_SNP	FBgn0032723	ssp3	INTRON	4.18e-08
5	C	2L_18926452_SNP	FBgn0032723	ssp3	INTRON	5.4e-08
5	C	2L_18923668_SNP	FBgn0032723	ssp3	INTRON	4.88e-08
5	C	2L_18942708_SNP	FBgn0032723	ssp3	SYNONYMOUS_CODING	3.33e-07
5	C	2L_18936862_SNP	FBgn0032723	ssp3	INTRON	7.97e-06
5	C	2L_18921415_SNP	FBgn0032723	ssp3	INTRON	6.77e-06
5	C	2L_18919585_SNP	FBgn0032723	ssp3	INTRON	7.62e-06
5	C	2L_18920846_SNP	FBgn0032723	ssp3	INTRON	8.08e-06
5	C	2L_20405095_SNP	FBgn0032857	CG10947	INTRON	6.24e-06
5	C	2L_21909142_SNP	FBgn0032967	CG1428	DOWNSTREAM	2.23e-10
5	C	2L_21909299_SNP	FBgn0032967	CG1428	DOWNSTREAM	1.53e-06
5	C	2L_21909304_SNP	FBgn0032967	CG1428	DOWNSTREAM	1.53e-06
5	C	2R_2918687_SNP	FBgn0033128	Tsp42Eg	INTRON	1.2e-05
5	C	2R_16955711_SNP	FBgn0034582	Cht9	SYNONYMOUS_CODING	4.26e-05
5	C	3L_3005820_SNP	FBgn0035385	FR	INTRON	7.56e-06
5	C	3L_4097622_SNP	FBgn0035497	CG14995	NON_SYNONYMOUS_CODING	3.05e-06
5	C	3L_4393248_SNP	FBgn0035539	slow	INTRON	2.33e-06
5	C	3L_4417369_SNP	FBgn0035542	DOR	INTRON	2.76e-06
5	C	3L_4415856_SNP	FBgn0035542	DOR	INTRON	3.3e-06
5	C	3L_4418646_SNP	FBgn0035542	DOR	INTRON	5.6e-06
5	C	3L_11751885_SNP	FBgn0036202	CG6024	INTRON	2.13e-06
5	C	3L_11750651_SNP	FBgn0036202	CG6024	INTRON	3.2e-06
5	C	3L_11751918_SNP	FBgn0036202	CG6024	INTRON	9.9e-06
5	C	3L_11751967_SNP	FBgn0036202	CG6024	INTRON	9.01e-06
5	C	3L_12165811_SNP	FBgn0036260	Rh7	INTRON	8.91e-06
5	C	3L_12165813_SNP	FBgn0036260	Rh7	INTRON	8.91e-06
5	C	3L_12165828_SNP	FBgn0036260	Rh7	INTRON	8.91e-06
5	C	3L_12165796_SNP	FBgn0036260	Rh7	INTRON	9.98e-06
5	C	3L_12337936_SNP	FBgn0036278	GRHRII	INTRON	8.77e-06
5	C	3L_12476856_SNP	FBgn0036287	CG10663	INTRON	5.22e-07
5	C	3L_12824822_SNP	FBgn0036316	CG10960	INTRON	4.91e-07
5	C	3L_12824847_SNP	FBgn0036316	CG10960	INTRON	4.91e-07
5	C	3L_12830032_SNP	FBgn0036316	CG10960	INTRON	4.91e-07
5	C	3L_12830016_DEL	FBgn0036316	CG10960	INTRON	5.62e-07
5	C	3L_12823015_SNP	FBgn0036316	CG10960	INTRON	1.85e-07
5	C	3L_12830005_SNP	FBgn0036316	CG10960	INTRON	9.02e-07
5	C	3L_12830009_SNP	FBgn0036316	CG10960	INTRON	9.02e-07
5	C	3L_12830011_DEL	FBgn0036316	CG10960	INTRON	9.02e-07
5	C	3L_12830014_SNP	FBgn0036316	CG10960	INTRON	9.02e-07
5	C	3L_12821515_SNP	FBgn0036316	CG10960	INTRON	6.27e-07
5	C	3L_12822371_SNP	FBgn0036316	CG10960	INTRON	2.47e-06
5	C	3L_12833427_SNP	FBgn0036316	CG10960	INTRON	2.49e-06
5	C	3L_12822965_SNP	FBgn0036316	CG10960	INTRON	5.26e-06
5	C	3L_12829558_SNP	FBgn0036316	CG10960	INTRON	8.73e-06
5	C	3L_12849677_SNP	FBgn0036319	Ent3	UTR_3_PRIME	8.44e-06
5	C	3L_12964146_SNP	FBgn0036327	CG10748	DOWNSTREAM	1.71e-06
5	C	3L_13002834_SNP	FBgn0036332	CG11261	NON_SYNONYMOUS_CODING	3.59e-07
5	C	3L_18156021_SNP	FBgn0036781	CG13699	UPSTREAM	1.83e-07
5	C	3L_18155052_SNP	FBgn0036781	CG13699	INTRON	9.4e-07
5	C	3L_18155170_SNP	FBgn0036781	CG13699	INTRON	9.33e-07
5	C	3L_18150012_SNP	FBgn0036781	CG13699	INTRON	5.24e-06
5	C	3L_18150461_SNP	FBgn0036781	CG13699	INTRON	7.22e-06
5	C	3L_18156038_SNP	FBgn0036781	CG13699	UPSTREAM	8.96e-06
5	C	3L_18156032_SNP	FBgn0036781	CG13699	UPSTREAM	5.16e-06
5	C	3L_18155991_SNP	FBgn0036781	CG13699	UPSTREAM	4.9e-06
5	C	3L_21968394_SNP	FBgn0037146	CG7470	INTRON	4.03e-06
5	C	3L_21968129_SNP	FBgn0037146	CG7470	INTRON	6.32e-06
5	C	3R_2112850_SNP	FBgn0037421	CG15594	UPSTREAM	5.49e-06
5	C	3R_19512464_SNP	FBgn0039102	SPE	NON_SYNONYMOUS_CODING	1.38e-06
5	C	3L_2238442_SNP	FBgn0040507	ACXD	SYNONYMOUS_CODING	2.06e-07
5	C	X_19574743_SNP	FBgn0043903	dome	INTRON	8.8e-06
5	C	2L_11590944_DEL	FBgn0046212	CG15841	DOWNSTREAM	3.67e-07
5	C	3L_12125053_SNP	FBgn0046296	CG11534	UPSTREAM	8.78e-06
5	C	2R_396941_SNP	FBgn0050260	tRNA:CR30260	UPSTREAM	8.87e-06
5	C	2L_21728683_SNP	FBgn0051619	CG31619	UTR_3_PRIME	5.64e-06
5	C	2L_21725893_SNP	FBgn0051619	CG31619	INTRON	1.06e-05
5	C	2L_1877731_SNP	FBgn0051663	CG31663	INTRON	9.2e-05
5	C	3L_10170407_SNP	FBgn0052057	dpr10	INTRON	1.67e-06
5	C	3L_10530403_SNP	FBgn0052062	A2bp1	INTRON	4.18e-06
5	C	3L_10530258_SNP	FBgn0052062	A2bp1	INTRON	8.38e-06
5	C	3L_18924335_INS	FBgn0052204	CG32204	INTRON	9.12e-06
5	C	2R_15139931_SNP	FBgn0053453	CG33453	DOWNSTREAM	2.68e-06
5	C	2R_15139913_INS	FBgn0053453	CG33453	DOWNSTREAM	1.75e-06
5	C	2R_15139909_SNP	FBgn0053453	CG33453	DOWNSTREAM	2.13e-06
5	C	2R_15139910_SNP	FBgn0053453	CG33453	DOWNSTREAM	2.13e-06
5	C	2R_15139905_DEL	FBgn0053453	CG33453	DOWNSTREAM	2.47e-06
5	C	2R_15139937_SNP	FBgn0053453	CG33453	DOWNSTREAM	3.87e-06
5	C	2R_15139977_SNP	FBgn0053453	CG33453	DOWNSTREAM	6.99e-06
5	C	2R_15139956_SNP	FBgn0053453	CG33453	DOWNSTREAM	9.1e-06
5	C	2R_15139942_DEL	FBgn0053453	CG33453	DOWNSTREAM	9.7e-06
5	C	3R_3461682_SNP	FBgn0083963	CG34127	INTRON	2.22e-06
5	C	3R_3461679_SNP	FBgn0083963	CG34127	INTRON	6.16e-06
5	C	3R_3461672_SNP	FBgn0083963	CG34127	INTRON	7.51e-06
5	C	2L_21743112_SNP	FBgn0086779	step	INTRON	7.44e-07
5	C	2L_21741296_SNP	FBgn0086779	step	DOWNSTREAM	3.2e-06
5	C	2L_21754583_SNP	FBgn0086779	step	INTRON	8.07e-07
5	C	2L_21755023_SNP	FBgn0086779	step	INTRON	4.65e-06
5	C	X_20409940_SNP	FBgn0259162	RunxB	INTRON	2.93e-06
5	C	X_12148384_INS	FBgn0259240	Ten-a	INTRON	1.33e-05
5	C	X_6402103_SNP	FBgn0259242	CG42340	INTRON	1.96e-05
5	C	2R_288444_SNP	FBgn0260798	Gprk1	INTRON	8.13e-06
5	C	3L_12815870_SNP	FBgn0260965	CG42588	NON_SYNONYMOUS_CODING	3.7e-06
5	C	3L_12813843_SNP	FBgn0260965	CG42588	NON_SYNONYMOUS_CODING	4.34e-06
5	C	3L_12808938_SNP	FBgn0260965	CG42588	INTRON	4.23e-06
5	C	3L_12814032_SNP	FBgn0260965	CG42588	NON_SYNONYMOUS_CODING	4.23e-06
5	C	3L_12816844_SNP	FBgn0260965	CG42588	INTRON	8.49e-06
5	C	2R_6218177_SNP	FBgn0261698	CG42732	INTRON	1.97e-06
5	C	3L_12727290_SNP	FBgn0261933	SmD1	INTRON	7.04e-06
5	C	3L_12727267_SNP	FBgn0261933	SmD1	INTRON	5.56e-06
5	C	3L_12727288_SNP	FBgn0261933	SmD1	INTRON	6.15e-06
5	C	3L_12725838_SNP	FBgn0261933	SmD1	DOWNSTREAM	6.79e-06
5	C	3L_12725885_SNP	FBgn0261933	SmD1	DOWNSTREAM	8.77e-06
5	C	3L_12727296_SNP	FBgn0261933	SmD1	INTRON	8.65e-06
5	C	3L_12727300_SNP	FBgn0261933	SmD1	INTRON	8.65e-06
5	C	3L_12726310_INS	FBgn0261933	SmD1	DOWNSTREAM	8.85e-06
5	C	2L_18945759_SNP	FBgn0262095	CG42848	UPSTREAM	6.68e-08
5	C	2L_18945751_SNP	FBgn0262095	CG42848	UPSTREAM	4.82e-08
5	C	2L_18945924_SNP	FBgn0262095	CG42848	UPSTREAM	8.61e-08
5	C	2L_18946801_SNP	FBgn0262095	CG42848	SYNONYMOUS_CODING	8.61e-08
5	C	2L_18947480_SNP	FBgn0262095	CG42848	DOWNSTREAM	1.62e-07
5	C	2R_14581030_SNP	FBgn0262103	Sik3	INTRON	5.03e-06
5	C	2L_20487695_SNP	FBgn0262455	mir-1	DOWNSTREAM	4.33e-06
5	C	2L_20487693_SNP	FBgn0262455	mir-1	DOWNSTREAM	5.54e-06
5	C	3L_15642077_DEL	FBgn0262529	CG43083	INTRON	7.03e-06
5	C	3L_12802921_SNP	FBgn0262714	Sap130	INTRON	4.23e-06
5	C	3L_16004067_SNP	FBgn0263601	mib1	INTRON	5.63e-07
5	C	3L_16004055_SNP	FBgn0263601	mib1	INTRON	1.06e-06
5	C	3L_16004079_INS	FBgn0263601	mib1	INTRON	2.62e-06
5	C	3L_16004047_SNP	FBgn0263601	mib1	INTRON	2.3e-06
5	C	2L_19829160_SNP	FBgn0263873	sick	INTRON	3.67e-06
5	C	2L_19930639_SNP	FBgn0263873	sick	INTRON	1.82e-06
5	C	2L_19948733_SNP	FBgn0263873	sick	INTRON	1.59e-06
5	C	2L_19936584_SNP	FBgn0263873	sick	INTRON	9.33e-07
5	C	2L_19933914_SNP	FBgn0263873	sick	INTRON	1.29e-06
5	C	2L_19909272_SNP	FBgn0263873	sick	SYNONYMOUS_CODING	6.39e-06
5	C	2R_2995480_DEL	FBgn0263934	esn	INTRON	2.11e-06
5	C	3L_13528968_DEL	FBgn0264001	bru-3	DOWNSTREAM	7.81e-06
5	C	3L_13528965_SNP	FBgn0264001	bru-3	DOWNSTREAM	7.26e-06
5	C	3L_13528966_INS	FBgn0264001	bru-3	DOWNSTREAM	8.1e-06
5	C	2L_19976452_SNP	FBgn0264443	CG43861	INTRON	5.28e-07
5	C	3L_13296591_SNP	FBgn0264512	CR43911	DOWNSTREAM	4.44e-06
5	C	3L_13296592_SNP	FBgn0264512	CR43911	DOWNSTREAM	4.44e-06
5	C	2R_396553_SNP	FBgn0264909	CR44100	DOWNSTREAM	5.01e-06
5	C	3R_10521342_SNP	FBgn0265140	Meltrin	INTRON	2.62e-06
5	C	2L_21920643_SNP				5.56e-08
5	C	2L_21920650_SNP				5.56e-08
5	C	2L_21878705_SNP				2.48e-07
5	C	2L_21941377_SNP				1.17e-06
5	C	2L_21923221_SNP				1.87e-06
5	C	2L_21929985_SNP				1.38e-06
5	C	2L_13088247_SNP				1.02e-05
5	C	2L_13088409_SNP				1.02e-05
5	C	2L_21848891_SNP				2.92e-06
5	C	2L_22002879_INS				4.47e-06
5	C	3L_18157137_SNP				1.16e-05
5	C	2L_21910025_SNP				4.88e-06
5	C	2L_21910054_SNP				4.88e-06
5	C	2L_21847033_SNP				4.64e-06
5	C	3L_12725274_DEL				9.45e-08
5	C	2L_21824028_SNP				9.98e-06
5	C	3L_11249553_SNP				4.42e-06
5	C	2L_21594134_SNP				1.25e-05
5	C	3L_12724376_SNP				2.27e-06
5	C	2L_21823667_SNP				1.04e-05
5	C	3L_13119247_SNP				1.72e-05
5	C	2L_11701943_SNP				4.57e-06
5	C	X_20561193_SNP				7.39e-06
5	C	X_20571391_DEL				1.56e-06
5	C	2L_13088042_SNP				6.12e-07
5	C	3L_3029602_SNP				1.48e-05
5	C	2L_11705199_SNP				2.89e-06
5	C	2L_19266299_SNP				1.36e-05
5	C	2L_11705163_SNP				2.69e-06
5	C	X_20561220_SNP				9.52e-06
5	C	2L_21999043_SNP				4e-06
5	C	3L_12656799_SNP				6.99e-06
5	C	3L_12724375_SNP				2.21e-06
5	C	3L_9192943_SNP				8.66e-06
5	C	X_13977386_SNP				7.95e-07
5	C	2L_11704687_DEL				5.55e-06
5	C	3L_12724373_SNP				5.84e-06
5	C	3L_12927379_SNP				6.46e-06
5	C	3L_12927393_SNP				5.78e-06
5	C	X_20571195_SNP				4.98e-06
5	C	3L_12722053_SNP				4.15e-07
5	C	X_20571199_SNP				5.43e-06
5	C	X_20571338_SNP				5.32e-06
5	C	X_20571220_SNP				7.75e-06
5	C	X_20571225_SNP				7.75e-06
5	C	2R_391969_SNP				9.48e-06
5	C	2L_21875209_SNP				9.96e-06
5	C	2L_13103081_SNP				3.79e-06
5	C	3L_12725007_SNP				3.96e-07
5	C	2L_13103067_SNP				5.17e-06
5	C	3L_5878794_SNP				4.44e-06
5	C	3L_12724801_SNP				4.8e-06
5	C	3L_12724811_SNP				4.72e-06
5	C	3L_11447064_SNP				5.43e-06
5	C	3L_757851_SNP				7.18e-06
5	C	3L_11447058_SNP				6.82e-06
5	C	2L_13103053_SNP				1.77e-06
5	C	3L_12648800_SNP				8.29e-06
5	C	3L_9240152_DEL				6.05e-06
5	C	3L_12661193_DEL				4.82e-06
5	C	2L_13103091_SNP				3.4e-06
5	C	2L_13102922_SNP				5.17e-06
5	C	3L_9239853_SNP				8.56e-06
5	C	3L_12722016_SNP				8.97e-06
5	C	2L_5499546_SNP				9.06e-06
1	L	X_3060180_SNP	FBgn0004647	N	SYNONYMOUS_CODING	1.01e-05
1	L	X_16200557_SNP	FBgn0027521	CG3679	UTR_3_PRIME	3.06e-06
1	L	X_16200544_SNP	FBgn0027521	CG3679	UTR_3_PRIME	5.14e-06
1	L	X_15463002_SNP	FBgn0030653	CG7860	UPSTREAM	6.71e-06
1	L	X_15462747_SNP	FBgn0030653	CG7860	UPSTREAM	9.83e-06
1	L	2R_7157512_SNP	FBgn0033603	Cpr47Ef	SYNONYMOUS_CODING	1.25e-05
1	L	X_4216138_SNP	FBgn0040907	mRpL33	SYNONYMOUS_CODING	2.43e-06
1	L	X_4216132_SNP	FBgn0040907	mRpL33	SYNONYMOUS_CODING	5.37e-06
1	L	3R_23368163_SNP	FBgn0046887	Gr98b	UPSTREAM	2.43e-06
1	L	3R_26469967_SNP	FBgn0051013	CG31013	INTRON	3.22e-06
1	L	3R_26470169_SNP	FBgn0051013	CG31013	INTRON	7.17e-06
1	L	2R_6493992_SNP	FBgn0263102	psq	INTRON	5.57e-06
1	L	3L_2680111_SNP	FBgn0264606	CG43955	INTRON	3.44e-06
1	L	3L_2680106_SNP	FBgn0264606	CG43955	INTRON	4.19e-06
1	L	3L_2680382_INS	FBgn0264606	CG43955	INTRON	8.13e-06
1	L	3L_4921245_SNP				3.24e-07
1	L	X_20571220_SNP				6.73e-07
1	L	X_20571225_SNP				6.73e-07
1	L	X_20571199_SNP				9.27e-07
1	L	X_15540200_SNP				4.33e-06
1	L	X_20571194_SNP				2.88e-06
1	L	3R_24068525_SNP				1.19e-05
1	L	X_18993792_SNP				1.24e-05
1	L	X_20852792_SNP				1.21e-05
1	L	X_20571391_DEL				8.43e-06
1	L	X_20571195_SNP				6.94e-06
1	L	X_20571210_SNP				8.01e-06
1	L	X_20571201_MNP				6.8e-06
5	L	3L_21253931_SNP	FBgn0004865	Eip78C	INTRON	1.62e-06
5	L	3L_3816723_SNP	FBgn0004888	Scsalpha	SYNONYMOUS_CODING	3.94e-06
5	L	3L_3816708_SNP	FBgn0004888	Scsalpha	SYNONYMOUS_CODING	7.15e-06
5	L	3L_3532034_SNP	FBgn0005640	Eip63E	INTRON	1.75e-05
5	L	3L_13221139_SNP	FBgn0023095	caps	UPSTREAM	1.95e-05
5	L	X_6997709_SNP	FBgn0029936	CG4617	SYNONYMOUS_CODING	8.3e-06
5	L	2R_16960337_SNP	FBgn0034583	CG10527	UPSTREAM	6.95e-06
5	L	2R_16960330_SNP	FBgn0034583	CG10527	UPSTREAM	7.73e-06
5	L	2R_19606345_SNP	FBgn0034898	CG18128	UTR_3_PRIME	1.45e-05
5	L	3L_3812744_SNP	FBgn0035464	CG12006	NON_SYNONYMOUS_CODING	8.75e-06
5	L	3L_10037652_SNP	FBgn0040823	dpr6	INTRON	1.29e-05
5	L	X_10003992_SNP	FBgn0083940	CG34104	INTRON	1e-05
5	L	2L_4708893_SNP	FBgn0085380	CG34351	INTRON	5.27e-07
5	L	3L_9931950_SNP	FBgn0085385	CG34356	INTRON	1.89e-06
5	L	3L_9931838_SNP	FBgn0085385	CG34356	INTRON	6.43e-06
5	L	X_15289425_SNP	FBgn0263257	cngl	INTRON	1.13e-05
5	L	X_6984903_SNP	FBgn0264270	Sxl	INTRON	1.1e-06
5	L	X_6984953_SNP	FBgn0264270	Sxl	INTRON	2.25e-06
5	L	X_6983588_SNP	FBgn0264270	Sxl	INTRON	2.93e-06
5	L	X_6975823_SNP	FBgn0264270	Sxl	INTRON	7.89e-06
5	L	2L_19266299_SNP				2.84e-07
5	L	X_20571210_SNP				4.25e-07
5	L	X_20571391_DEL				4.58e-07
5	L	2L_19265015_SNP				5.4e-06
5	L	X_20571211_INS				4.3e-07
5	L	X_20571199_SNP				1.18e-06
5	L	X_20571194_SNP				1.63e-06
5	L	X_20571185_SNP				1.46e-06
5	L	X_20571201_MNP				1.72e-06
5	L	3L_2316526_SNP				3.19e-06
5	L	X_20571338_SNP				2.04e-06
5	L	X_20571254_SNP				3.68e-06
5	L	2L_19265020_SNP				5.37e-06
5	L	X_20571192_SNP				2.61e-06
5	L	3L_2316514_SNP				5.81e-06
5	L	X_20571195_SNP				4.13e-06
5	L	X_20571220_SNP				3.68e-06
5	L	X_20571225_SNP				3.68e-06
5	L	3L_11249553_SNP				6.52e-06
5	L	X_20571241_SNP				5.93e-06
5	L	X_20571206_INS				5.97e-06
5	L	X_7005884_DEL				9.8e-06
5	L	3L_2316496_DEL				7.64e-06
5	L	3L_2316502_SNP				9.31e-06

## Sheet: End candidates shared - age
Candidate genes for endurance shared across ages within each treatment
Control					Lisinopril treated
Flybase ID	Gene name				Flybase ID	Gene name
NONE					NONE

## Sheet: End candidates shared trt
Candidate genes for endurance shared across treatments within each age
Endurance Week 1							Endurance Week 5
Flybase ID	Gene name						Flybase ID	Gene name
FBgn0051013	CG31013						FBgn0004865	Eip78C
FBgn0264606	CG43955						FBgn0023095	caps
