# Supplementary material for: Genome-Wide Analysis in Drosophila Reveals the Genetic Basis of Variation in Age-Specific Physical Performance and Response to ACE Inhibition
Source: Genes (Basel). 2022 Jan 14;13(1):143. doi: 10.3390/genes13010143 (PMC8775566; doi:10.3390/genes13010143)
Supplement: Supplementary file 1 [file genes-13-00143-s001.zip › Supplementary Table S5 Candidate gene information.xlsx]

## Sheet: candidate gene info
Supplementary Table S5 Candidate gene information
Candidate genes associated with each phenotype (A) climbing speed and (B) endurance. C = untreated food, L = Lisinopril-treated food. FBgn = FlyBase ID.
(A)	Climbing speed candidate gene information
Age (Weeks)	Treatment	FlyBase ID	Gene Symbol	Biological Processes	Molecular Function/Disease association
1	C	FBgn0037327	PEK	ATP-binding, protein kinase activity	related to early onset diabetes
1	C	FBgn0036376	Liprin-Beta	protein binding, axon target recognition, neuromuscular synaptic growth	protein binding
1	C	FBgn0011715	Snr1*	wing morphgenesis, muscle organ development	RHABDOID TUMOR PREDISPOSITION SYNDROME 1; RTPS1
1	C	FBgn0262018	CadN2	calcium ion binding, axon extension involved in axon guidance	macular dystrophy, cancer
1	C	FBgn0037328	RpL35A	structural constituent of ribosome, regulation of growth and hormone	ribosomal protein
1	C	FBgn0037330	mRpL44	ribonuclease III activity, structural constituent of ribosome, mitochondrial translation	oxidative phosphorylation
1	C	FBgn0015360	oxt	acetylglucosaminyltransferase activity, sugar/sulphate metabolic processes	transferase enzymes which act upon xylose
1	C	FBgn0015542	sima*	cellular response to insulin stimulus, regulation of transcription, DNA-templated	hypoxia related, receptor
1	C	FBgn0035876	PEX2	ubiquitination, spermatid development	PEROXISOME BIOGENESIS
1	C	FBgn0003175	px*	imaginal disc-derived wing vein morphogenesis
1	C	FBgn0027655	htt	dendric/synaptic transport	related to huntingtins
1	C	FBgn0085447	sif	nucleotide exchange factor, actin organization	cancer/nucleotide exchange factor
1	C	FBgn0033296	Mal-A7	carbohydrate metabolic process	sugar breakdown
1	C	FBgn0004795	retn	DNA binding/ transcription factor, muscle organ development, neuro development, glucose metabolic processes	DNA interactions
1	C	FBgn0051116	CIC-a	chloride channel activity	chloride voltage gated channel activity
1	C	FBgn0051632	sens-2	metal ion binding	zinc binding, growth factor
1	C	FBgn0000565	Eip71CD*	determination of adult lifespan, response to oxidative stress	oxidative stress
1	C	FBgn0264857	iab-8	no info
1	C	FBgn0264495	gpp	gene regulation	gene regulation
1	C	FBgn0040823	dpr6	sensory perception of chemical stimulus	cell adhesion
1	C	FBgn0004870	bab1	DNA/protein binding, imaginal disc-derived leg morphogenesis	DNA binding
1	C	FBgn0034606	ASPP	protein tyrosine kinase activator activity	protein regulation, cancer supression
1	C	FBgn0010015	CanA1	hydrolase activity, regulation of sleep/immune response	phosphatase activity
1	C	FBgn0010114	hig	synaptic target recognition	susceptbility to diseases
1	C	FBgn0263929	jvl	dorsal appendage formation, chaeta morphogenesis
1	C	FBgn0052274	Drsl1	defense response to fungus
1	C	FBgn0023511	Edem1*	calcium ion binding, determination of adult lifespan, ER unfolded protein response	ER response
1	L	FBgn0037327	PEK	ATP-binding, protein kinase activity	related to early onset diabetes
1	L	FBgn0037330	mRpL44	ribonuclease III activity, structural constituent of ribosome, mitochondrial translation	oxidative phosphorylation
1	L	FBgn0011715	Snr1*	wing morphgenesis, muscle organ development	RHABDOID TUMOR PREDISPOSITION SYNDROME 1; RTPS1
1	L	FBgn0037328	RpL35A	structural constituent of ribosome, regulation of growth and hormone	ribosomal protein
1	L	FBgn0027655	htt	dendric/synaptic transport	related to huntingtins
1	L	FBgn0023511	Edem1*	calcium ion binding, determination of adult lifespan, ER unfolded protein response	ER response
1	L	FBgn0037332	Hcs	biotin-[propionyl-CoA-carboxylase (ATP-hydrolyzing)] ligase activity	holocarboxylase synthetase activity
1	L	FBgn0038295	Gyc88E	CO, NO, O2, heme, protein binding, respond to reactive oxygen species, cGMP synthesis	guanylate cyclase activity
1	L	FBgn0034606	ASPP	protein tyrosine kinase activator activity	protein regulation, cancer supression
1	L	FBgn0036376	Liprin-Beta	protein binding, axon target recognition, neuromuscular synaptic growth	protein binding
1	L	FBgn0264495	gpp	gene regulation,histone methylation	gene regulation
1	L	FBgn0005658	Ets65A	DNA binding	cancer, transcription factor
1	L	FBgn0000565	Eip71CD*	determination of adult lifespan, response to oxidative stress	oxidative stress
1	L	FBgn0037899	RpL24-Like	structural constituent of ribosome	ribosomal protein
1	L	FBgn0264857	iab-8	no info
1	L	FBgn0013469	klu	metal ion/nuc acid binding, neurogenesis, tricarboxylic acid cycle, positive regulation of compound eye retinal cell programmed cell death	metal ion binding
1	L	FBgn0035936	Tsp66E	no info	related to prostate cancer, protein coding
1	L	FBgn0032586	Tpr2	unfolded protein binding	protein coding
1	L	FBgn0037382	Hpr1	mRNA export, signal transduction	protein coding
1	L	FBgn0022702	Cht2	chitin development	protein coding
1	L	FBgn0037301	Mms19	DNA repair	cell assembly
1	L	FBgn0261258	rgn	carbohydrate binding, tissue regeneration	cell regeneration
1	L	FBgn0034058	Pex11	peroxisome fission/organization	peroxisome biogenesis
1	L	FBgn0003175	px*	imaginal disc-derived wing vein morphogenesis
1	L	FBgn0013576	mtd*	imaginal disc-derived wing morphogenesis, immune response	oxidation resistance
1	L	FBgn0036518	RhoGAP71E*	imaginal disc-derived leg morphogenesis, GTPase activator activity	GTPase activity
1	L	FBgn0010434	cora*	adult somatic muscle development, heart process, maintenance of imaginal disc-derived wing hair orientation	protein coding
1	L	FBgn0004870	bab1*	imaginal disc-derived leg morphogenesis, DNA bidning	DNA binding
1	L	FBgn0051561	Osi16	no info
1	L	FBgn0010282	TfIIFalpha	DNA binding and transcriptional regulation	transcription factor
1	L	FBgn0010114	hig	synaptic target recognition	susceptbility to diseases
1	L	FBgn0004795	retn	DNA binding/ transcription factor, muscle organ development, neuro development, glucose metabolic processes	DNA interactions
1	L	FBgn0010015	CanA1	hydrolase activity, regulation of sleep/immune response	phosphatase activity
1	L	FBgn0259173	corn	microtubule/protein binding	protein binding
1	L	FBgn0262018	CadN2	Calcium ion binding, cell adhesion/development	protein coding for cell adhesion
1	L	FBgn0010909	msn	ATP binding, regulation of glucose metabolic process, kinase activity	protein coding for kinase
1	L	FBgn0011569	can	spermatid development,	related to hypoxia, TATA box binding
1	L	FBgn0033296	Mal-A7	carbohydrate metabolic process	sugar breakdown
5	C	FBgn0003896	tup	chaeta morphogenesis, heart development, muscle cell fate determination	transcription factor, protein coding
5	C	FBgn0052423	shep	adult locomotory behavior, RNA binding	RNA binding
5	C	FBgn0020655	Gap69C	GTP binding	GTPase protein
5	C	FBgn0004865	Eip78C	regulation of glucose metabolic process, hormone receptor activity	protein receptor
5	C	FBgn0064123	stg1	channel regulator activity	Calcium voltage gated channel subunit
5	C	FBgn0003310	S	stem cell fate commitment (eye photoreceptor)
5	C	FBgn0026592	Fie	no info
5	C	FBgn0035542	DOR	steroid hormone receptor binding	protein coding, cancer related
5	C	FBgn0260660	mp	carbohydrate binding, cardiac muscle atrophy, mitochondrion organization, skeletal muscle atrophy	protein coding for collagenous structures
5	C	FBgn0261514	nimA	sensory perception of pain	receptor coding
5	C	FBgn0015381	dsf	zinc ion binding, hormone receptor	receptor coding
5	C	FBgn0000395	cv-2	BMP binding, imaginal disc-derived wing morphogenesis, imaginal disc-derived wing vein specification	BMP binding
5	C	FBgn0019890	Smg5	NOT ? gene silencing by miRNA	mRNA decay factor
5	C	FBgn0004623	Gbeta76C	activation of phospholipase C activity, G-protein coupled receptor, transduction	G-protein, signal transduction
5	C	FBgn0003090	pk	zinc ion binding, imaginal disc-derived leg joint morphogenesis	Epilepsy, myopathy related
5	C	FBgn0023495	Lip3	lipase activity	Lipase activity
5	C	FBgn0031150	bves	no info	Protein coding
5	C	FBgn0033935	Sin1	dendrite morphogenesis	protein kinase activity
5	C	FBgn0031309	Tfb4	nucleotide-excision repair	transcription factor activity
5	C	FBgn0024277	trio	Rho guanyl-nucleotide exchange factor activity,imaginal disc-derived leg morphogenesis, mushroom body development	exchange factor activity
5	C	FBgn0029091	CS-2	chitin synthase activity	synthase activity
5	C	FBgn0003016	osp	no info	protein coding
5	C	FBgn0262737	mub	regulation of alternative mRNA splicing, via spliceosome, sleep	protein coding
5	C	FBgn0032536	Ance-3	peptidyl-dipeptidase activity	Renal/blood pressure functions
5	C	FBgn0036896	wnd	ATP binding, protein kinase activity	protein kinase activity
5	C	FBgn0002973	numb	embryonic heart tube development, pericardial nephrocyte differentiation, muscle cell fate specification	protein coding
5	C	FBgn0013469	klu	metal ion/nuc acid binding, neurogenesis, tricarboxylic acid cycle, positive regulation of compound eye retinal cell programmed cell death	metal ion binding
5	C	FBgn0030897	Frq1	calcium ion binding, neuromuscular junction development	neuronal protein
5	C	FBgn0033652	ths	growth factor activity, glial cells, heart development
5	C	FBgn0263930	dally	imaginal disc-derived leg morphogenesis, imaginal disc-derived wing morphogenesis, imaginal disc-derived wing vein morphogenesis, regulation of imaginal disc growth	development morphogenesis
5	C	FBgn0262139	trh	limb development	obesity related
5	C	FBgn0085387	shakB	jump response, reponse to light
5	C	FBgn0003138	Ptp61F	negative regulation of insulin receptor signaling pathway.	protein phosphatase activity related to diabetes
5	C	FBgn0051721	Trim9	zinc binding, neurogenesis	related to mental retardation
5	C	FBgn0260642	Antp	heart development, muscle cell fate specification	related to skeletal abnormalities
5	C	FBgn0263144	bin3	snRNA binding, negative regulation of translation	protein binding
5	C	FBgn0020617	Rx	regulation of glucose metabolic process	related to muscular degeneration
5	C	FBgn0263934	esn	zinc ion binding	Epilepsy, myopathy related
5	C	FBgn0004456	mew	cell adhesion molecule binding, imaginal disc-derived wing morphogenesis, muscle attachment	cell adhesion
5	C	FBgn0016797	fz2	Wnt-protein binding, imaginal disc-derived wing margin morphogenesis	Wnt signaling pathway
5	C	FBgn0085408	Shroom	actin filament binding	related to mental retardation
5	C	FBgn0004514	Oct-TyrR	G-protein receptor activity	obesity related
5	C	FBgn0000464	Lar	motor neuron axon guidance, protein tyrosine phosphatase activity	protein phosphatase activity related to cancer
5	C	FBgn0000183	BicD	regulation of endocytosis, protein binding	RNA transport
5	C	FBgn0035539	slow	calcium ion binding, regulation of imaginal disc-derived wing size, muscle attachment	membrane receptor protein coding?
5	C	FBgn0015039	Cyp9b2	heme binding, iron binding	related to oxidative stress
5	C	FBgn0032264	Lip4	triglyceride lipase activity	protein conding for lipase
5	C	FBgn0000547	ed	dorsal appendage formation, imaginal disc-derived wing morphogenesis, muscle organ morphogenesis	related to muscular degeneration
5	C	FBgn0036298	nst	magnesium ion binding, trachea development	related to immunodeficiency
5	C	FBgn0035385	FR	adult locomotory behavior
5	C	FBgn0041622	Or69a	olfactory receptor activity
5	C	FBgn0036010	Ir67a	ligand-gated ion channel activity	ion receptor
5	C	FBgn0053516	dpr3	store-operated calcium entry
5	C	FBgn0032723	ssp3	no info	ER protein
5	C	FBgn0263995	cpo	chemical synaptic transmission, olfactory	RNA binding
5	C	FBgn0034602	Lapsyn	nervous system development	disease susceptibility
5	C	FBgn0036333	MICAL-like	actin/zinc binding	cell binding protein
5	C	FBgn0000633	fas	cardioblast cell fate determination	cell adhesion and cancer
5	C	FBgn0026597	Axn	heart development, imaginal disc pattern formation, imaginal disc-derived wing morphogenesis, Wnt signal	hepato cancer
5	C	FBgn0000257	car	determination of adult lifespan	renal dysfunction
5	C	FBgn0033438	Mmp2	adult fat body development, imaginal disc fusion, thorax closure	related to heart disease
5	C	FBgn0015542	sima	cellular response to insulin stimulus	related to hypoxia
5	C	FBgn0035608	blanks	RNA interference	RNA binding
5	C	FBgn0265296	Decam2	homophilic cell adhesion via plasma membrane adhesion molecules	cell adhesion
5	C	FBgn0003068	per	age-dependent response to oxidative stress, determination of adult lifespan, locomotor rhythm	circadian rhythm
5	C	FBgn0261054	Sfp24Bc	multicellular organism reproduction	peptidase inhibitor
5	C	FBgn0036278	GRHRII	corazonin receptor activity, acetaldehyde metabolic process	protein binding
5	C	FBgn0025697	santa-maria	carotenoid metabolic process	scavenger receptor
5	C	FBgn0003435	sm	determination of adult lifespan, RNA bidnig	nuclear binding
5	C	FBgn0044020	Roc2	cullin family protein binding, ubiquitin protein ligase activity	protein ubiquitination
5	C	FBgn0038165	Task6	potassium channel activity	potassium channel activity
5	L	FBgn0010825	Gug	imaginal disc-derived leg morphogenesis,larval somatic muscle development	related to anormalities of the heart
5	L	FBgn0028871	Cpr35B	structural constituent of chitin-based cuticle	protein binding
5	L	FBgn0036010	Ir67a	ligand-gated ion channel activity	ion receptor
5	L	FBgn0004865	Eip78C	regulation of glucose metabolic process, hormone receptor activity	protein receptor
5	L	FBgn0002938	ninaC	ATP binding, motor activity, phototransduction	movement
5	L	FBgn0064123	stg1	channel regulator activity	Calcium voltage gated channel subunit
5	L	FBgn0085387	shakB	jump response, reponse to light
5	L	FBgn0260642	Antp	heart development, muscle cell fate specification	related to skeletal abnormalities
5	L	FBgn0004914	Hnf4	lipid biosynthetic process	related to diabetes
5	L	FBgn0035539	slow	calcium ion binding, regulation of imaginal disc-derived wing size, muscle attachment	membrane receptor protein coding?
5	L	FBgn0261054	Sfp24Bc	multicellular organism reproduction	peptidase inhibitor
5	L	FBgn0264754	btsz	actin filament organization,morphogenesis of embryonic epithelium, protein transport	protein encoding
5	L	FBgn0045495	Gr28b	immune response
5	L	FBgn0000633	fas	cardioblast cell fate determination	cell adhesion and cancer
5	L	FBgn0000183	BicD	regulation of endocytosis, protein binding	RNA transport
5	L	FBgn0001234	Hsromega	positive regulation of cellular protein metabolic process
5	L	FBgn0261238	Alh	zinc ion binding, instar larval development, larval somatic muscle development	cancer related
5	L	FBgn0031150	bves	no info	Protein coding
5	L	FBgn0035331	Dms-R1	myosuppressin receptor activity, adult locomotory behavior	G-protein receptor
5	L	FBgn0002973	numb	embryonic heart tube development, pericardial nephrocyte differentiation, muscle cell fate specification	protein coding
5	L	FBgn0051481	pb	regulation of glucose metabolic process, specification of segmental identity, labial segment	related to hearing
5	L	FBgn0035786	Tsp66A	no info
(B)	Endurance candidate gene information
Age (Weeks)	Treatment	FlyBase ID	Gene Symbol	Biological Processes	Molecular Function/Disease association
1	C	FBgn0040849	Ir41a	ligand-gated ion channel activity	receptor related to epilepsy, mental retardation
1	C	FBgn0085447	sif	guanyl-nucleotide exchange factor activity, actin cytoskeleton organization, positive regulation of filopodium assembly	protein coding
1	C	FBgn0014141	cher	determination of adult lifespan, actin binding, motor neuron axon guidance	actin coding
1	C	FBgn0085443	spri	Ras GTPase binding, guanyl-nucleotide exchange factor activity, axon extension	Ras GTPase activity
1	L	FBgn0040907	mRpL33	structural constituent of ribosome, translation	protein for translation
1	L	FBgn0046887	Gr98b	taste receptor activity	no info
1	L	FBgn0263102	psq	DNA binding, imaginal disc-derived wing morphogenesis	DNA domain binding
1	L	FBgn0004647	N	calcium ion binding, determination of adult lifespan, metabolic, morphogenesis	related to many muscular functions
1	L	FBgn0033603	Cpr47Ef	structural constituent of chitin-based cuticle	no info
5	C	FBgn0001253	ImpE1	imaginal disc eversion	component of basement membrane
5	C	FBgn0086779	step	imaginal disc-derived wing vein morphogenesis,positive regulation of multicellular organism growth, regulation of actin organization	GEP activity
5	C	FBgn0024941	RSG7	intracellular signal transduction	signal transduction
5	C	FBgn0032723	ssp3	no info	ER protein
5	C	FBgn0033128	Tsp42Eg	no info	protein for retinal membrane
5	C	FBgn0263601	mib1	imaginal disc-derived leg/wing morphogenesis, lateral inhibition, Notch signaling pathway	ubiquitin protein
5	C	FBgn0259162	RunxB	ATP, DNA binding.	Transcription factor and protein for peroxisome biogenesis
5	C	FBgn0039102	SPE	defense response, immune response	no info
5	C	FBgn0259240	Ten-a	synaptic growth at neuromuscular junction	transmembrane protein, for nucleus
5	C	FBgn0004865	Eip78C	regulation of glucose metabolic process, hormone receptor activity	protein receptor
5	C	FBgn0263873	sick	actin filament organization, phototransduction	neuronal protein
5	C	FBgn0040507	ACXD	cyclic nucleotide biosynthetic process	adenylate cyclase activity
5	C	FBgn0052062	A2bp1	imaginal disc-derived wing vein specification, mRNA/nucleotide binding	RNA bindin protein
5	C	FBgn0022700	Cht4	chitinase activity	chitinase activity
5	C	FBgn0034582	Cht9	chitinase activity	chitinase activity
5	C	FBgn0031820	DLP	determination of adult lifespan, response to oxidative stress	transcriptional regulator
5	C	FBgn0003997	W	many functions related to cell death/growth	no info
5	C	FBgn0036260	Rh7	G-protein coupled photoreceptor activity	protein receptors
5	C	FBgn0264512	CR43911	no info	no info
5	C	FBgn0023095	caps	motor neuron axon guidance	protein receptors
5	C	FBgn0264909	CR44100	no info	no info
5	C	FBgn0003310	S	stem cell fate commitment (eye photoreceptor)	no info
5	C	FBgn0016081	fry	chaeta, antennal, dendrite morphogenesis	microtubule binding, transcriptional coactivator
5	C	FBgn0260798	Gprk1	imaginal disc-derived wing vein specification,G-protein coupled receptor signaling pathway	G protein coupled receptor
5	C	FBgn0261933	SmD1	poly(A) RNA binding	RNA protein binding
5	C	FBgn0265140	Meltrin	protein oligomerization, zinc binding, metallopeptidase activity	metallopeptidase activity
5	C	FBgn0050260	tRNA:CR30260	ACA codon-amino acid adaptor activity	no info
5	C	FBgn0016672	Ipp	inositol-1,4-bisphosphate 1-phosphatase activity	phosphatase activity
5	L	FBgn0004865	Eip78C	regulation of glucose metabolic process, hormone receptor activity	protein receptor
5	L	FBgn0264270	Sxl	growth factor activity, mRNA binding, imaginal disc growth	RNA binding protein
5	L	FBgn0263257	cngl	intracellular cyclic nucleotide activated cation channel activity, cation transport	no info
5	L	FBgn0004888	Scsalpha	cofactor binding, tricarboxylic acid cycle	protein ligase activity
5	L	FBgn0023095	caps	motor neuron axon guidance	protein receptors
5	L	FBgn0005640	Eip63E	developmental growth, metamorphosis	cylin kinase activity
5	L	FBgn0040823	dpr6	sensory perception of chemical stimulus	cell adhesion
