# Supplementary material for: Genome-Wide Analysis in Drosophila Reveals the Genetic Basis of Variation in Age-Specific Physical Performance and Response to ACE Inhibition
Source: Genes (Basel). 2022 Jan 14;13(1):143. doi: 10.3390/genes13010143 (PMC8775566; doi:10.3390/genes13010143)
Supplement: Supplementary file 1 [file genes-13-00143-s001.zip › Supplementary Table S6 GWA results for sensitivity to Lisinopril.xlsx]

## Sheet: Climbing Speed
Supplementary Table S6 GWA results for sensitivity to Lisinopril
Climbing Speed
Age (Weeks)	Chrom/Pos	FlyBase ID	Gene Symbol	Site Class	SNP P-value
1	3R_20310267_SNP	FBgn0000039	nAcRalpha-96Ab	UPSTREAM	9.637e-06
1	3R_22735053_SNP	FBgn0004359	T48	INTRON	7.632e-06
1	2R_19794434_SNP	FBgn0015268	Nap1	INTRON	6.247e-06
1	2L_14049504_SNP	FBgn0028875	nAcRalpha-34E	INTRON	2.91e-06
1	2L_14069265_SNP	FBgn0028875	nAcRalpha-34E	INTRON	4.277e-05
1	X_12355818_SNP	FBgn0030391	Rab40	SYNONYMOUS_CODING	6.633e-06
1	2L_4740347_DEL	FBgn0031627	CG15630	INTRON	9.847e-06
1	2R_3419892_SNP	FBgn0033188	CG1600	INTRON	9.966e-06
1	2R_5849491_SNP	FBgn0033466	Pal1	SYNONYMOUS_CODING	3.726e-06
1	3L_1966024_SNP	FBgn0035298	CG1140	SYNONYMOUS_CODING	9.116e-06
1	3L_15294848_SNP	FBgn0036492	Best3	SYNONYMOUS_CODING	3.496e-06
1	3R_1949856_SNP	FBgn0037402	Vha14-2	Downstream	5.202e-06
1	3R_1949857_SNP	FBgn0037402	Vha14-2	Downstream	5.202e-06
1	3L_10571656_SNP	FBgn0052062	A2bp1	INTRON	1.885e-06
1	3L_7391066_SNP	FBgn0052379	CG32379	SYNONYMOUS_CODING	8.774e-06
1	3L_5248533_SNP	FBgn0052423	shep	INTRON	4.038e-06
1	3L_5248341_SNP	FBgn0052423	shep	INTRON	6.886e-06
1	3L_16232596_SNP	FBgn0263608	l(3)72Dr	DOWNSTREAM	2.962e-06
1	3L_16232587_SNP	FBgn0263608	l(3)72Dr	DOWNSTREAM	3.355e-06
1	2L_9290278_INS	FBgn0263984	CG43733	INTRON	7.76e-06
1	2L_8872171_SNP				6.945e-06
1	3R_9402874_SNP				1.667e-05
1	3L_6633442_SNP				8.794e-06
5	3R_8203564_SNP	FBgn0010042	GstD6	UTR_3_PRIME	8.465e-06
5	3R_8203566_SNP	FBgn0010042	GstD6	UTR_3_PRIME	8.465e-06
5	2R_9333535_SNP	FBgn0013765	cnn	INTRON	6.839e-07
5	2R_19408385_SNP	FBgn0015372	RabX1	SYNONYMOUS_CODING	8.38e-06
5	2L_774927_SNP	FBgn0031276	CG12506	DOWNSTREAM	3.184e-06
5	2L_4896756_SNP	FBgn0031645	CG3036	INTRON	1.072e-07
5	2L_4896757_SNP	FBgn0031645	CG3036	INTRON	3.019e-06
5	2L_6356518_SNP	FBgn0031803	ppk14	DOWNSTREAM	1.353e-05
5	2L_16810120_SNP	FBgn0032609	CG13280	INTRON	1.177e-06
5	2L_16801968_SNP	FBgn0032609	CG13280	DOWNSTREAM	8.555e-07
5	2R_12110774_SNP	FBgn0034093	CG15706	UTR_3_PRIME	2.128e-06
5	3L_4863708_SNP	FBgn0035581	CG17150	INTRON	1.448e-06
5	3L_8531296_SNP	FBgn0035909	ergic53	DOWNSTREAM	4.953e-06
5	3L_18099452_SNP	FBgn0036773	CG13698	UPSTREAM	2.186e-07
5	3L_18099456_DEL	FBgn0036773	CG13698	UPSTREAM	2.56e-07
5	3L_18099462_MNP	FBgn0036773	CG13698	UPSTREAM	2.56e-07
5	3L_18099448_SNP	FBgn0036773	CG13698	UPSTREAM	3.583e-07
5	3L_18099455_SNP	FBgn0036773	CG13698	UPSTREAM	4.204e-07
5	3L_18099420_SNP	FBgn0036773	CG13698	UPSTREAM	8.967e-07
5	3L_18099424_SNP	FBgn0036773	CG13698	UPSTREAM	7.488e-07
5	3L_18099438_SNP	FBgn0036773	CG13698	UPSTREAM	6.223e-07
5	3L_18099440_SNP	FBgn0036773	CG13698	UPSTREAM	7e-07
5	3L_18099426_DEL	FBgn0036773	CG13698	UPSTREAM	1.36e-06
5	3L_18099435_SNP	FBgn0036773	CG13698	UPSTREAM	1.36e-06
5	3L_18099450_SNP	FBgn0036773	CG13698	UPSTREAM	1.035e-06
5	3L_18099423_SNP	FBgn0036773	CG13698	UPSTREAM	1.366e-06
5	3L_18099432_SNP	FBgn0036773	CG13698	UPSTREAM	1.947e-06
5	3L_18099437_SNP	FBgn0036773	CG13698	UPSTREAM	2.838e-06
5	3L_18099383_SNP	FBgn0036773	CG13698	UPSTREAM	2.865e-06
5	3L_18099410_MNP	FBgn0036773	CG13698	UPSTREAM	5.699e-06
5	3L_18099446_SNP	FBgn0036773	CG13698	UPSTREAM	6.277e-06
5	3L_18099406_MNP	FBgn0036773	CG13698	UPSTREAM	8.722e-06
5	3L_18099468_SNP	FBgn0036774	mRpS26	UPSTREAM	2.015e-07
5	3L_18099475_SNP	FBgn0036774	mRpS26	UPSTREAM	1.816e-07
5	3L_18099485_SNP	FBgn0036774	mRpS26	UPSTREAM	2.995e-07
5	3L_18099481_DEL	FBgn0036774	mRpS26	UPSTREAM	3.163e-07
5	3L_18099489_DEL	FBgn0036774	mRpS26	UPSTREAM	2.312e-06
5	3L_18099474_SNP	FBgn0036774	mRpS26	UPSTREAM	1.019e-06
5	3L_19485670_SNP	FBgn0036875	CG9449	DOWNSTREAM	4.947e-06
5	2L_16801168_SNP	FBgn0040260	Ugt36Bc	SYNONYMOUS_CODING	7.072e-06
5	2R_447121_SNP	FBgn0046692	Stlk	INTRON	5.93e-06
5	2R_452687_SNP	FBgn0046692	Stlk	DOWNSTREAM	5.059e-06
5	3R_17986795_SNP	FBgn0051163	SKIP	INTRON	3.848e-06
5	3R_17986778_SNP	FBgn0051163	SKIP	INTRON	6.033e-06
5	3R_17986789_SNP	FBgn0051163	SKIP	INTRON	7.643e-06
5	2L_9578836_SNP	FBgn0051709	CG31709	NON_SYNONYMOUS_CODING	1.119e-06
5	2L_9579282_SNP	FBgn0051709	CG31709	NON_SYNONYMOUS_CODING	1.616e-05
5	X_3463082_SNP	FBgn0052792	CG32792	INTRON	3.391e-06
5	2L_7106071_SNP	FBgn0085407	Pvf3	INTRON	1.429e-06
5	2L_2752729_SNP	FBgn0250906	Pgk	INTRON	3.661e-06
5	2R_13693886_SNP	FBgn0259211	grh	INTRON	1.295e-06
5	3R_24736170_SNP	FBgn0259220	Doa	INTRON	1.057e-05
5	3R_18490441_INS	FBgn0261572	CG42686	INTRON	7.909e-06
5	2L_20478121_SNP	FBgn0262879	CG43234	UPSTREAM	8.401e-06
5	2R_3002864_SNP	FBgn0263934	esn	INTRON	9.225e-06
5	3R_13793877_SNP	FBgn0263995	cpo	INTRON	1.432e-06
5	3R_13793879_SNP	FBgn0263995	cpo	INTRON	1.514e-06
5	3R_13793867_SNP	FBgn0263995	cpo	INTRON	6.047e-06
5	2L_3575208_SNP	FBgn0264370	CR43822	UPSTREAM	7.074e-06
5	X_20213344_INS				2.317e-06
5	X_20213158_SNP				5.516e-06
5	2L_775095_SNP				4.589e-06
5	X_15171113_SNP				1.322e-05
5	2R_459329_SNP				4.371e-06
5	X_20213636_SNP				8.56e-06
5	2R_463247_SNP				8.334e-06
5	2L_3402497_SNP				7.943e-06
5	2L_6843049_SNP				9.479e-06

## Sheet: CS trait vs sens by age
Climbing Speed Sensitivity candidates shared with trait candidate genes within each age
Week 1			Week 5
FlyBase ID	Gene Symbol		FlyBase ID	Gene Symbol
FBgn0263984	CG43733		FBgn0263934	esn
			FBgn0263995	cpo

## Sheet: Endurance
Endurance
Age (Weeks)	Chrom/Pos	FlyBase ID	Gene Symbol	Site Class	SNP P-value
1	2R_5867119_SNP	FBgn0000606	eve	INTRON	7.391e-06
1	3L_13924796_SNP	FBgn0001108	Gl	INTRON	1.034e-06
1	3L_13924805_SNP	FBgn0001108	Gl	INTRON	2.338e-06
1	3L_1061298_SNP	FBgn0004870	bab1	INTRON	2.352e-06
1	3R_23561626_SNP	FBgn0005659	Ets98B	UPSTREAM	8.979e-06
1	3R_23561639_SNP	FBgn0005659	Ets98B	UPSTREAM	8.979e-06
1	3R_19614618_SNP	FBgn0015513	mbc	INTRON	6.192e-06
1	3R_19614621_INS	FBgn0015513	mbc	INTRON	7.678e-06
1	2R_5886818_SNP	FBgn0022382	Pka-R2	INTRON	3.682e-06
1	2R_5881846_SNP	FBgn0022382	Pka-R2	UTR_3_PRIME	5.181e-06
1	3L_6598450_SNP	FBgn0024177	zpg	SYNONYMOUS_CODING	8.505e-06
1	2R_6598088_SNP	FBgn0024836	stan	SYNONYMOUS_CODING	6.308e-06
1	X_19104424_SNP	FBgn0030998	CG14195	INTRON	4.091e-05
1	2L_5094141_SNP	FBgn0031682	CG5828	SYNONYMOUS_CODING	3.585e-05
1	3L_4788145_SNP	FBgn0035574	Gef64C	INTRON	8.013e-06
1	3L_12849233_SNP	FBgn0036319	Ent3	SYNONYMOUS_CODING	5.729e-07
1	3L_15478212_SNP	FBgn0036497	ran-like	NON_SYNONYMOUS_CODING	9.675e-06
1	3R_11840203_INS	FBgn0038391	GATAe	INTRON	4.485e-05
1	3R_15452688_INS	FBgn0038720	CG6231	INTRON	3.384e-06
1	3R_25543356_SNP	FBgn0039685	Obp99b	UPSTREAM	1.256e-06
1	3L_12630165_SNP	FBgn0052111	CG32111	INTRON	1.755e-06
1	3L_14055274_SNP	FBgn0052138	CG32138	INTRON	1.791e-06
1	2R_6087237_SNP	FBgn0085250	CG34221	UPSTREAM	3.962e-06
1	2R_6088109_SNP	FBgn0085250	CG34221	UPSTREAM	7.172e-06
1	3L_14899780_SNP	FBgn0259099	DCX-EMAP	INTRON	4.13e-06
1	2L_12516816_SNP	FBgn0259176	bun	INTRON	2.601e-06
1	X_9943280_SNP	FBgn0263132	Cht6	INTRON	3.17e-06
1	3R_20446117_SNP	FBgn0263490	mld	SYNONYMOUS_CODING	2.3e-05
1	2R_5866179_INS	FBgn0264599	CR43948	EXON	6.683e-06
1	2R_5866197_SNP	FBgn0264599	CR43948	EXON	5.577e-06
1	2R_5862625_SNP				2.594e-06
1	2R_18021944_DEL				7.257e-06
5	3R_20314666_SNP	FBgn0000039	nAcRalpha-96Ab	SYNONYMOUS_CODING	7.966e-06
5	2R_9363232_SNP	FBgn0000119	arr	INTRON	7.112e-06
5	2L_9461571_SNP	FBgn0002973	numb	NON_SYNONYMOUS_CODING	1.227e-05
5	2L_14656136_SNP	FBgn0003016	osp	INTRON	7.818e-06
5	2L_14656130_SNP	FBgn0003016	osp	INTRON	8.738e-06
5	2L_14656154_SNP	FBgn0003016	osp	INTRON	8.337e-06
5	2L_14656003_SNP	FBgn0003016	osp	INTRON	7.455e-06
5	3L_3543840_SNP	FBgn0005640	Eip63E	INTRON	6.698e-06
5	2R_9040294_SNP	FBgn0020370	TppII	DOWNSTREAM	1.027e-05
5	2L_3519729_SNP	FBgn0031546	CG8851	SYNONYMOUS_CODING	5.25e-06
5	2L_17260509_SNP	FBgn0032629	beat-IIIc	UTR_5_PRIME	3.791e-06
5	2R_3991196_SNP	FBgn0033260	Cul-4	SYNONYMOUS_CODING	2.621e-06
5	2R_4284035_SNP	FBgn0033289	CG2121	UTR_3_PRIME	6.287e-06
5	2R_12110774_SNP	FBgn0034093	CG15706	UTR_3_PRIME	2.073e-05
5	3R_5399190_SNP	FBgn0037715	CG9399	NON_SYNONYMOUS_CODING	7.381e-06
5	3R_22915502_SNP	FBgn0039481	Cpr97Eb	UTR_3_PRIME	8.859e-06
5	2R_9972456_SNP	FBgn0040752	Prosap	INTRON	7.961e-07
5	2R_9974696_SNP	FBgn0040752	Prosap	INTRON	1.512e-05
5	2R_17562306_SNP	FBgn0050263	CG30263	UPSTREAM	1.225e-05
5	3R_20715345_SNP	FBgn0051121	CG31121	INTRON	1.173e-05
5	3L_7698887_SNP	FBgn0052373	CG32373	INTRON	9.439e-06
5	2R_7989757_SNP	FBgn0086677	jeb	INTRON	6.198e-07
5	2R_13707928_SNP	FBgn0259211	grh	INTRON	8.819e-06
5	2R_17552882_SNP	FBgn0259708	CG42362	UTR_3_PRIME	2.892e-06
5	2L_11200192_SNP	FBgn0259822	Ca-beta	INTRON	4.248e-06
5	2L_11200195_SNP	FBgn0259822	Ca-beta	INTRON	5.987e-06
5	3L_17057451_SNP	FBgn0260943	Rbp6	DOWNSTREAM	3.555e-06
5	3R_22666386_SNP	FBgn0262473	Tl	SYNONYMOUS_CODING	9.845e-06
5	3L_2835501_SNP	FBgn0263392	CG43444	INTRON	5.899e-06
5	X_11951946_SNP	FBgn0264675	CR43960	INTRON	8.199e-06
5	3R_22029972_SNP	FBgn0265379	CR44320	INTRON	1.841e-06
5	2L_5399715_SNP				1.087e-06
5	3R_13970631_SNP				1.809e-06
5	3R_25114616_DEL				7.096e-06
5	3R_4034915_SNP				9.956e-06
5	3R_4374627_SNP				3.649e-06
5	3L_18198302_MNP				3.382e-06
5	3L_18198362_SNP				3.06e-06
5	3L_18198330_SNP				9.292e-06
5	3L_18198337_SNP				9.843e-06

## Sheet: Endurance trait vs sens by age
Endurance Sensitivity candidates shared with trait candidate genes within each age
Age (Weeks)				Age (Weeks)
1 Week				5 Week
FlyBase ID	Gene Symbol			FlyBase ID	Gene Symbol
NONE				FBgn0005640	Eip63E
