# Supplementary material for: Genome-Wide Analysis in Drosophila Reveals the Genetic Basis of Variation in Age-Specific Physical Performance and Response to ACE Inhibition
Source: Genes (Basel). 2022 Jan 14;13(1):143. doi: 10.3390/genes13010143 (PMC8775566; doi:10.3390/genes13010143)
Supplement: Supplementary file 1 [file genes-13-00143-s001.zip › Supplementary Table S7 Physical performance of in vivo RNAi lines.xlsx]

## Sheet: Climbing Speed
Supplementary Table S7 Physical performance of in vivo RNAi lines
1wk=0; 5wks=1; control=0; Lisinopril=1; attp2=0, axn stock1=1, axn stock2=2, fz stock1=3, fz stock2=4, nmo stock1=5, nmo stock2=6, wg stock1=7, wg stock2=8
Genotype	Age	Treatment	Climbing Speed
1	0	0	1.34328
1	0	0	1.52542
1	0	0	1.63636
0	0	0	2.57143
0	0	0	1.83673
0	0	0	2.36842
0	0	0	1.91489
0	0	0	0
0	0	0	1.8
0	0	0	0
0	0	0	2.19512
0	0	0	1.76471
0	0	0	1.11111
0	0	0	0
0	0	0	3
0	0	0	2.25
0	0	0	0
0	0	0	4.28571
0	0	0	1.47541
0	0	0	2.8125
0	0	0	1.55172
0	0	0	2.57143
0	0	0	2.72727
0	0	0	1.47541
0	0	0	1.34328
0	0	0	1.91489
0	0	0	1.21622
0	0	0	2.14286
0	0	0	1.91489
0	0	0	0
0	1	0	0.82
0	1	0	0
0	1	0	0
0	1	0	0
0	1	0	0
0	1	0	1.06
0	1	0	0
0	1	0	0.76
0	1	0	0
0	1	0	0
0	1	0	0
0	1	0	0
0	1	0	0
0	1	0	0
0	1	0	1.29
0	1	0	0
0	1	0	0
0	1	0	0.77
0	1	0	1.25
0	1	0	0
0	1	0	0
0	1	0	0
0	1	0	0
0	1	0	0
0	1	0	1.25
0	1	0	0
0	1	0	0
0	1	0	0.64
0	1	0	0
0	1	0	0
0	0	1	2.90323
0	0	1	2.25
0	0	1	2.5
0	0	1	1.36364
0	0	1	2.64706
0	0	1	2.19512
0	0	1	1.07143
0	0	1	2.19512
0	0	1	1.5
0	0	1	2.5
0	0	1	3
0	0	1	2.19512
0	0	1	1.21622
0	0	1	2.14286
0	0	1	2.5
0	0	1	1.07143
0	0	1	2.8125
0	0	1	2
0	0	1	2.25
0	0	1	1.04651
0	0	1	1.36364
0	0	1	1.83673
0	0	1	0.865385
0	0	1	0
0	0	1	1.95652
0	0	1	2.30769
0	0	1	0
0	0	1	1.55172
0	0	1	2.72727
0	0	1	1.83673
0	1	1	2.08
0	1	1	0.5
0	1	1	0
0	1	1	0.26
0	1	1	0
0	1	1	1.01
0	1	1	0
0	1	1	0.8
0	1	1	0.85
0	1	1	0.56
0	1	1	0
0	1	1	0.58
0	1	1	1.14
0	1	1	0
0	1	1	0.72
0	1	1	0
0	1	1	0
0	1	1	0.58
0	1	1	0
0	1	1	0.72
0	1	1	1.1
0	1	1	1.3
0	1	1	0.8
0	1	1	0.58
0	1	1	0.73
0	1	1	0
0	1	1	0.85
0	1	1	0.56
0	1	1	0.82
0	1	1	0.74
1	0	0	1.65
1	0	0	0.58
1	0	0	0
1	0	0	1.52
1	0	0	0.83
1	0	0	0
1	0	0	2.14
1	0	0	0.45
1	0	0	0.91
1	0	0	0
1	0	0	1.2544
1	0	0	0.64
1	0	0	0.75
1	0	0	0
1	0	0	0.83
1	0	0	0
1	0	0	0.99
1	0	0	1.58
1	0	0	0
1	0	0	0.6
1	0	0	0.72
1	0	0	2.09
1	0	0	0
1	0	0	1.99
1	0	0	0.93
1	0	0	0.71
1	0	0	1.3
1	0	0	1.62
1	0	0	1.48
1	0	0	1.46
1	0	1	0.89
1	0	1	1.54
1	0	1	0
1	0	1	0.9
1	0	1	0
1	0	1	1.63
1	0	1	1.48
1	0	1	0
1	0	1	0
1	0	1	0.42
1	0	1	0.735
1	0	1	2.08
1	0	1	0
1	0	1	1.03
1	0	1	0.51
1	0	1	1.56
1	0	1	0
1	0	1	1.87
1	0	1	1.43
1	0	1	0
1	0	1	1.55
1	0	1	1.41
1	0	1	2.05
1	0	1	1.78
1	0	1	0.85
1	0	1	0
1	0	1	1.44
1	0	1	0
1	0	1	0.99
1	0	1	1.53
1	1	0	0
1	1	0	0.93
1	1	0	0.78
1	1	0	0
1	1	0	1.02
1	1	0	1.32
1	1	0	1.795
1	1	0	0
1	1	0	0
1	1	0	0.89
1	1	0	0.72
1	1	0	1.09
1	1	0	0
1	1	0	1.42
1	1	0	0
1	1	0	0
1	1	0	1.14
1	1	0	0.99
1	1	0	0
1	1	0	0.85
1	1	0	0
1	1	0	0.58
1	1	0	0.94
1	1	0	0
1	1	0	1.31
1	1	0	0
1	1	0	1.19
1	1	0	0.55
1	1	0	0.94
1	1	0	0.79
1	1	1	0
1	1	1	0.81
1	1	1	1.05
1	1	1	0.8
1	1	1	0
1	1	1	1.31
1	1	1	0.71
1	1	1	0.34
1	1	1	0.64
1	1	1	0.82
1	1	1	0.78
1	1	1	0.91
1	1	1	0
1	1	1	0.67
1	1	1	1.04
1	1	1	0
1	1	1	0.98
1	1	1	1.4
1	1	1	0.54
1	1	1	0
1	1	1	0.93
1	1	1	0
1	1	1	0.84
1	1	1	1.12
1	1	1	0
1	1	1	0.68
1	1	1	0.77
1	1	1	0.54
1	1	1	0.79
1	1	1	1.52
2	0	0	0
2	0	0	1.49
2	0	0	0.99
2	0	0	0
2	0	0	0.47
2	0	0	2.24
2	0	0	1.62
2	0	0	0.82
2	0	0	0
2	0	0	1.59
2	0	0	1.62
2	0	0	1.11
2	0	0	0.96
2	0	0	0
2	0	0	0
2	0	0	1.99
2	0	0	2.08
2	0	0	0.7
2	0	0	0
2	0	0	1.82
2	0	0	0
2	0	0	0.98
2	0	0	0.995
2	0	0	2.09
2	0	0	0.78
2	0	0	0
2	0	0	1.88
2	0	0	1.67
2	0	0	0.48
2	0	0	0
2	0	1	1.08
2	0	1	1.48
2	0	1	0.73
2	0	1	0
2	0	1	2.31
2	0	1	0.98
2	0	1	0.78
2	0	1	1.92
2	0	1	1.08
2	0	1	0.81
2	0	1	2.07
2	0	1	0
2	0	1	0.48
2	0	1	0.92
2	0	1	1.37
2	0	1	1.66
2	0	1	1.41
2	0	1	0.59
2	0	1	0
2	0	1	1.22
2	0	1	1.19
2	0	1	1.47
2	0	1	0
2	0	1	0.37
2	0	1	0.96
2	0	1	1.01
2	0	1	0.98
2	0	1	1.39
2	0	1	1.2
2	0	1	0
2	1	0	0.93
2	1	0	0
2	1	0	0.53
2	1	0	0.81
2	1	0	0
2	1	0	1.05
2	1	0	0.73
2	1	0	0.37
2	1	0	0.675
2	1	0	1.18
2	1	0	0.74
2	1	0	0.92
2	1	0	0
2	1	0	0.61
2	1	0	1.32
2	1	0	0.79
2	1	0	0.88
2	1	0	0
2	1	0	1.02
2	1	0	0.775
2	1	0	0.9
2	1	0	0.64
2	1	0	0
2	1	0	0.76
2	1	0	1.64
2	1	0	0.45
2	1	0	0.55
2	1	0	1.49
2	1	0	0.45
2	1	0	0
2	1	1	0.79
2	1	1	1.1
2	1	1	0
2	1	1	1.24
2	1	1	0.62
2	1	1	0.85
2	1	1	0.57
2	1	1	1.72
2	1	1	0
2	1	1	0.75
2	1	1	0.89
2	1	1	0.43
2	1	1	1.51
2	1	1	0.88
2	1	1	0.845
2	1	1	0
2	1	1	1.49
2	1	1	0
2	1	1	0.98
2	1	1	0.72
2	1	1	0.91
2	1	1	1.04
2	1	1	0.7
2	1	1	0
2	1	1	0.895
2	1	1	0.79
2	1	1	0.94
2	1	1	1.09
2	1	1	0.65
2	1	1	0.83
3	0	0	1.9
3	0	0	0.89
3	0	0	0
3	0	0	0
3	0	0	0
3	0	0	1.41
3	0	0	0
3	0	0	0
3	0	0	2.08
3	0	0	0
3	0	0	1.75
3	0	0	0
3	0	0	1.44
3	0	0	1.51
3	0	0	1.66
3	0	0	2.3
3	0	0	0.59
3	0	0	1.96
3	0	0	2.02
3	0	0	1.32
3	0	0	1.89
3	0	0	1.28
3	0	0	1.57
3	0	0	1.97
3	0	0	1.28
3	0	0	0
3	0	0	1.76
3	0	0	1.97
3	0	0	1.47
3	0	0	0
3	0	1	1.28
3	0	1	0
3	0	1	0.8
3	0	1	0
3	0	1	1.93
3	0	1	0
3	0	1	2.39
3	0	1	0
3	0	1	1.76
3	0	1	0
3	0	1	1.49
3	0	1	0
3	0	1	1.84
3	0	1	1.69
3	0	1	1.78
3	0	1	1.24
3	0	1	1.04
3	0	1	1.15
3	0	1	2.17
3	0	1	1.61
3	0	1	1.24
3	0	1	0
3	0	1	1.52
3	0	1	0
3	0	1	0
3	0	1	0.3
3	0	1	0.95
3	0	1	0
3	0	1	1.04
3	0	1	1.17
3	1	0	0
3	1	0	0.51
3	1	0	0.95
3	1	0	0.49
3	1	0	0.69
3	1	0	0.98
3	1	0	1.15
3	1	0	1.07
3	1	0	1.22
3	1	0	0.75
3	1	0	0.43
3	1	0	1.21
3	1	0	0.97
3	1	0	0
3	1	0	1.19
3	1	0	1.44
3	1	0	0.63
3	1	0	1.12
3	1	0	1.09
3	1	0	1.28
3	1	0	0.54
3	1	0	1.38
3	1	0	1.2
3	1	0	1.21
3	1	0	1.26
3	1	0	0
3	1	0	0.84
3	1	0	0
3	1	0	0.92
3	1	0	1.2
3	1	1	1.06
3	1	1	0.82
3	1	1	0
3	1	1	1.32
3	1	1	1.48
3	1	1	0.94
3	1	1	1
3	1	1	1.2
3	1	1	1.13
3	1	1	1.36
3	1	1	1.35
3	1	1	0
3	1	1	0.93
3	1	1	1.07
3	1	1	1.44
3	1	1	1.34
3	1	1	1.37
3	1	1	0
3	1	1	0.56
3	1	1	0.63
3	1	1	1
3	1	1	1.21
3	1	1	0
3	1	1	1.39
3	1	1	0.51
3	1	1	1.17
3	1	1	0.5
3	1	1	0.69
3	1	1	0
3	1	1	0
4	0	0	1.09
4	0	0	0
4	0	0	1.63
4	0	0	1.44
4	0	0	1.12
4	0	0	1.15
4	0	0	1.43
4	0	0	1.8
4	0	0	1.06
4	0	0	2.24
4	0	0	2.18
4	0	0	1.8
4	0	0	1.63
4	0	0	1.02
4	0	0	0
4	0	0	2.4
4	0	0	2.16
4	0	0	0
4	0	0	2.01
4	0	0	0
4	0	0	1.02
4	0	0	0
4	0	0	1.34
4	0	0	1.45
4	0	0	1.42
4	0	0	1.41
4	0	0	1.4
4	0	0	1.6
4	0	0	1.27
4	0	0	1.24
4	0	1	1.83
4	0	1	1.55
4	0	1	0.88
4	0	1	1.75
4	0	1	1.01
4	0	1	0
4	0	1	1.99
4	0	1	0
4	0	1	1.44
4	0	1	0
4	0	1	1.37
4	0	1	0.55
4	0	1	0
4	0	1	1.26
4	0	1	1.94
4	0	1	1.07
4	0	1	1.78
4	0	1	1.91
4	0	1	2.21
4	0	1	1.42
4	0	1	1.75
4	0	1	0.85
4	0	1	0.73
4	0	1	2.08
4	0	1	0
4	0	1	0.36
4	0	1	0.95
4	0	1	2.75
4	0	1	1.58
4	0	1	1.26
4	1	0	1.22
4	1	0	1.01
4	1	0	1.18
4	1	0	1.09
4	1	0	1.36
4	1	0	1.13
4	1	0	1.44
4	1	0	0
4	1	0	1.39
4	1	0	0.98
4	1	0	0
4	1	0	1.46
4	1	0	1.71
4	1	0	1.12
4	1	0	1.32
4	1	0	0.86
4	1	0	1.25
4	1	0	1.03
4	1	0	1.23
4	1	0	1.09
4	1	0	1.37
4	1	0	1.69
4	1	0	1.86
4	1	0	0.81
4	1	0	0
4	1	0	1.06
4	1	0	1.46
4	1	0	1.63
4	1	0	0.65
4	1	0	0.75
4	1	1	1.13
4	1	1	1.15
4	1	1	1.19
4	1	1	0
4	1	1	1
4	1	1	1.13
4	1	1	1.05
4	1	1	1.02
4	1	1	1.45
4	1	1	0.75
4	1	1	0
4	1	1	1.22
4	1	1	1.45
4	1	1	1.08
4	1	1	0.7
4	1	1	1.54
4	1	1	1.08
4	1	1	1.63
4	1	1	0.82
4	1	1	1.38
4	1	1	1.12
4	1	1	1.4
4	1	1	2.04
4	1	1	0.99
4	1	1	1.29
4	1	1	1.2
4	1	1	0
4	1	1	1.78
4	1	1	0
4	1	1	0
5	0	0	1.4
5	0	0	0
5	0	0	0.9
5	0	0	1.2
5	0	0	0
5	0	0	0
5	0	0	0
5	0	0	1.4
5	0	0	0
5	0	0	1.6
5	0	0	1.4
5	0	0	1.3
5	0	0	1.3
5	0	0	1.6
5	0	0	0.8
5	0	0	0.7
5	0	0	1.5
5	0	0	1.3
5	0	0	1.7
5	0	0	1.4
5	0	0	0
5	0	0	0
5	0	0	0.6
5	0	0	1.1
5	0	0	1.4
5	0	0	1.7
5	0	0	1.1
5	0	0	1.7
5	0	0	1.7
5	0	0	1.6
5	0	0	1.3
5	0	0	1.2
5	0	0	1.8
5	0	0	1.1
5	0	0	1.1
5	0	0	1.6
5	0	0	0
5	0	0	1
5	0	0	1.5
5	0	0	1.4
5	0	0	2
5	0	0	1.1
5	0	0	2.3
5	0	0	0
5	0	0	0.9
5	0	0	1
5	0	0	0
5	0	0	0
5	0	0	1.4
5	0	0	1.3
5	0	0	1.2
5	0	0	1.2
5	0	0	1.6
5	0	0	0.9
5	0	0	1.6
5	0	0	1.3
5	0	0	0.7
5	0	0	0.7
5	0	0	1.4
5	0	0	1.6
5	1	0	0
5	1	0	0
5	1	0	0.74
5	1	0	1.26
5	1	0	0
5	1	0	1.14
5	1	0	0
5	1	0	1.03
5	1	0	2.45
5	1	0	0
5	1	0	0
5	1	0	1.55
5	1	0	1.48
5	1	0	1.88
5	1	0	1.26
5	1	0	1.57
5	1	0	1.43
5	1	0	1.48
5	1	0	0
5	1	0	0.96
5	1	0	0
5	1	0	1.32
5	1	0	1.03
5	1	0	1.47
5	1	0	0.96
5	1	0	1.79
5	1	0	1.03
5	1	0	0
5	1	0	0.58
5	1	0	1.03
5	1	1	0.75
5	1	1	0
5	1	1	1.48
5	1	1	1.39
5	1	1	0.7
5	1	1	0.96
5	1	1	1.51
5	1	1	0.57
5	1	1	0.34
5	1	1	0
5	1	1	1.03
5	1	1	1.34
5	1	1	1.07
5	1	1	0.75
5	1	1	1.16
5	1	1	0.58
5	1	1	0
5	1	1	0.98
5	1	1	1.42
5	1	1	0
5	1	1	0
5	1	1	1.09
5	1	1	1.22
5	1	1	1.35
5	1	1	2.06
5	1	1	0.44
5	1	1	0.52
5	1	1	0
5	1	1	0
5	1	1	1.6
6	0	1	0
6	0	1	1
6	0	1	1.3
6	0	1	0
6	0	1	1.2
6	0	1	1
6	0	1	0
6	0	1	2.4
6	0	1	1.3
6	0	1	0
6	0	1	1.5
6	0	1	2
6	0	1	1.1
6	0	1	0
6	0	1	1.5
6	0	1	1.5
6	0	1	1.1
6	0	1	1.6
6	0	1	1.6
6	0	1	1.7
6	0	1	1.4
6	0	1	2.3
6	0	1	2
6	0	1	1.1
6	0	1	1.6
6	0	1	2
6	0	1	1.2
6	0	1	1.2
6	0	1	0
6	0	1	0
6	0	1	1.2
6	0	1	1.3
6	0	1	1.5
6	0	1	0.8
6	0	1	2
6	0	1	1.2
6	0	1	1.7
6	0	1	1.4
6	0	1	0.9
6	0	1	0
6	0	1	1.6
6	0	1	2
6	0	1	1.6
6	0	1	1.7
6	0	1	1.7
6	0	1	1.5
6	0	1	1.8
6	0	1	1.7
6	0	1	0
6	0	1	0.9
6	0	1	1.9
6	0	1	0
6	0	1	1.5
6	0	1	1.4
6	0	1	1.8
6	0	1	0.9
6	0	1	0
6	0	1	0
6	0	1	0
6	0	1	0
6	1	0	0.71
6	1	0	0
6	1	0	0
6	1	0	1.58
6	1	0	1.52
6	1	0	0.44
6	1	0	1.16
6	1	0	0
6	1	0	0.83
6	1	0	0.59
6	1	0	0.74
6	1	0	1.08
6	1	0	0
6	1	0	0.75
6	1	0	0.58
6	1	0	0.7
6	1	0	0
6	1	0	1.04
6	1	0	1.01
6	1	0	0
6	1	0	0
6	1	0	0.75
6	1	0	0.67
6	1	0	0.67
6	1	0	0.99
6	1	0	0.5
6	1	0	0
6	1	0	0
6	1	0	0.81
6	1	0	0.23
6	1	1	0.91
6	1	1	0.86
6	1	1	1.09
6	1	1	0.775
6	1	1	0.99
6	1	1	0.8
6	1	1	1.21
6	1	1	0
6	1	1	0.68
6	1	1	1.01
6	1	1	0
6	1	1	0.92
6	1	1	0.79
6	1	1	0.95
6	1	1	1.32
6	1	1	1.11
6	1	1	0.84
6	1	1	1.16
6	1	1	0
6	1	1	1.12
6	1	1	0.82
6	1	1	0.65
6	1	1	0.86
6	1	1	0
6	1	1	1.1
6	1	1	0.78
6	1	1	1.19
6	1	1	0.52
6	1	1	0.885
6	1	1	1.24
7	0	0	0.702686
7	0	0	0.607615
7	0	0	0.257548
7	0	0	0.204801
7	0	0	0
7	0	0	0
7	0	0	0
7	0	0	0.320205
7	0	0	1.08827
7	0	0	0.337407
7	0	0	0.61911
7	0	0	0.687758
7	0	0	0.500918
7	0	0	0
7	0	0	1.03758
7	0	0	0
7	0	0	0.520833
7	0	0	0.5826
7	0	0	0
7	0	0	0
7	0	0	0.597015
7	0	0	0
7	0	0	0.187754
7	0	0	0.840964
7	0	0	0
7	0	0	1.07656
7	0	0	0
7	0	0	0.924594
7	0	0	0.937598
7	0	0	0.937598
7	0	1	0.313687
7	0	1	0.2747
7	0	1	0
7	0	1	0
7	0	1	0.492126
7	0	1	0
7	0	1	0
7	0	1	0.320627
7	0	1	0.715421
7	0	1	0
7	0	1	0
7	0	1	0
7	0	1	0
7	0	1	1.2987
7	0	1	0
7	0	1	0
7	0	1	0
7	0	1	0.948067
7	0	1	0
7	0	1	0
7	0	1	0
7	0	1	0
7	0	1	0.200218
7	0	1	0.286087
7	0	1	0.498311
7	0	1	0
7	0	1	0.252958
7	0	1	0.709667
7	0	1	0.384205
7	0	1	0.867303
7	1	0	0.886001
7	1	0	0
7	1	0	0
7	1	0	0
7	1	0	0
7	1	0	0
7	1	0	0
7	1	0	0
7	1	0	0
7	1	0	0
7	1	0	0
7	1	0	0
7	1	0	0.357242
7	1	0	0
7	1	0	0
7	1	0	0
7	1	0	0
7	1	0	0
7	1	0	0
7	1	0	0
7	1	0	0
7	1	0	0
7	1	0	0
7	1	0	0
7	1	0	0
7	1	0	0.289194
7	1	0	1.0577
7	1	0	0.374735
7	1	0	0.534251
7	1	0	0.757512
7	1	1	0
7	1	1	0.427553
7	1	1	0
7	1	1	0.658762
7	1	1	0
7	1	1	0
7	1	1	0.64697
7	1	1	0.528417
7	1	1	1.37405
7	1	1	0.649257
7	1	1	0
7	1	1	0
7	1	1	0
7	1	1	0
7	1	1	0
7	1	1	1.04773
7	1	1	0
7	1	1	0
7	1	1	0
7	1	1	0.736498
7	1	1	0
7	1	1	0
7	1	1	0
7	1	1	0
7	1	1	0.81448
7	1	1	0
7	1	1	0.549786
7	1	1	0
7	1	1	0
7	1	1	0
8	0	0	0
8	0	0	0
8	0	0	1.2959
8	0	0	0.555281
8	0	0	0.856735
8	0	0	0
8	0	0	0.908357
8	0	0	0
8	0	0	0.84682
8	0	0	0.884086
8	0	0	1.94679
8	0	0	1.21984
8	0	0	0.548948
8	0	0	1.37994
8	0	0	1.35972
8	0	0	0.84515
8	0	0	1.42993
8	0	0	0.736739
8	0	0	0.782269
8	0	0	1.55065
8	0	0	1.29683
8	0	0	0.301296
8	0	0	1.33749
8	0	0	1.11084
8	0	0	1.53479
8	0	0	0
8	0	0	0.711687
8	0	0	1.1976
8	0	0	0
8	0	0	0.312446
8	0	1	1.40449
8	0	1	1.2366
8	0	1	1.4975
8	0	1	0
8	0	1	0.576664
8	0	1	1.307
8	0	1	1.49477
8	0	1	1.21671
8	0	1	0.973499
8	0	1	1.11885
8	0	1	0.815883
8	0	1	1.56114
8	0	1	1.1355
8	0	1	1.4995
8	0	1	0.685088
8	0	1	0.423829
8	0	1	0.4715
8	0	1	1.77971
8	0	1	1.61522
8	0	1	1.05696
8	0	1	0.434426
8	0	1	0.318257
8	0	1	1.65624
8	0	1	0.784724
8	0	1	1.53009
8	0	1	0
8	0	1	0.577108
8	0	1	0.128634
8	0	1	1.35399
8	0	1	0.688547
8	1	0	0.409594
8	1	0	0
8	1	0	0
8	1	0	0.89991
8	1	0	0
8	1	0	0.671592
8	1	0	0
8	1	0	0.497128
8	1	0	0
8	1	0	0
8	1	0	0
8	1	0	0
8	1	0	0.75815
8	1	0	0
8	1	0	0
8	1	0	0
8	1	0	0
8	1	0	0.473311
8	1	0	0.411805
8	1	0	0
8	1	0	0
8	1	0	0
8	1	0	0
8	1	0	0
8	1	0	0
8	1	0	0
8	1	0	0
8	1	0	0
8	1	0	0
8	1	1	0
8	1	1	0.322569
8	1	1	0.317035
8	1	1	0
8	1	1	1.26334
8	1	1	0
8	1	1	1.08264
8	1	1	0.550021
8	1	1	1.24464
8	1	1	0
8	1	1	0
8	1	1	0.962258
8	1	1	0
8	1	1	0.792952
8	1	1	0
8	1	1	0
8	1	1	0
8	1	1	0
8	1	1	0.741473
8	1	1	0.742268
8	1	1	0
8	1	1	0
8	1	1	0.242457
8	1	1	0
8	1	1	0
8	1	1	0
8	1	1	0
8	1	1	0
8	1	1	0
8	1	1	0
8	1	1	0

## Sheet: Endurance
Supplementary Table 6. RNAi climbing and endurance
1wk=0; 5wks=1; control=0; Lisinopril=1; attp2=0, axn stock1=1, axn stock2=2, fz stock1=3, fz stock2=4, nmo stock1=5, nmo stock2=6, wg stock1=7, wg stock2=8
Genotype	Age	Treatment	Endurance (cm)
0	0	0	20.4545
0	0	0	0
0	0	0	23.6842
0	0	0	26.129
0	0	0	30.916
0	0	0	25.1553
0	0	0	26.129
0	0	0	0
0	0	0	25.3125
0	0	0	0
0	0	0	24.8466
0	0	0	0
0	0	0	0
0	0	0	0
0	0	0	29.1367
0	0	0	37.5
0	0	0	0
0	0	0	27.1812
0	0	0	0
0	0	0	29.7794
0	0	0	21.3158
0	0	0	27.931
0	0	0	37.156
0	0	0	0
0	0	0	20.6633
0	0	0	28.5211
0	0	0	15
0	0	0	27.1812
0	0	0	0
0	0	0	0
0	1	0	0
0	1	0	0
0	1	0	0
0	1	0	0
0	1	0	0
0	1	0	0
0	1	0	0
0	1	0	12
0	1	0	0
0	1	0	0
0	1	0	0
0	1	0	0
0	1	0	0
0	1	0	0
0	1	0	0
0	1	0	0
0	1	0	0
0	1	0	0
0	1	0	0
0	1	0	0
0	1	0	0
0	1	0	0
0	1	0	0
0	1	0	0
0	1	0	0
0	1	0	0
0	1	0	0
0	1	0	0
0	1	0	0
0	1	0	0
0	0	1	29.562
0	0	1	31.6406
0	0	1	32.4
0	0	1	23.6842
0	0	1	28.125
0	0	1	30.4511
0	0	1	0
0	0	1	0
0	0	1	21.0938
0	0	1	31.8898
0	0	1	31.3953
0	0	1	25.3125
0	0	1	12.6562
0	0	1	0
0	0	1	35.5263
0	0	1	0
0	0	1	27.7397
0	0	1	23.9645
0	0	1	30
0	0	1	0
0	0	1	0
0	0	1	25.6329
0	0	1	10.6021
0	0	1	0
0	0	1	19.0141
0	0	1	22.7528
0	0	1	0
0	0	1	23.8235
0	0	1	31.8898
0	0	1	25
0	1	1	0
0	1	1	0
0	1	1	0
0	1	1	0
0	1	1	0
0	1	1	9
0	1	1	0
0	1	1	0
0	1	1	16.65
0	1	1	0
0	1	1	0
0	1	1	0
0	1	1	0
0	1	1	0
0	1	1	0
0	1	1	0
0	1	1	0
0	1	1	0
0	1	1	0
0	1	1	0
0	1	1	0
0	1	1	0
0	1	1	0
0	1	1	3.9
0	1	1	0
0	1	1	0
0	1	1	0
0	1	1	0
0	1	1	0
0	1	1	0
1	0	0	0
1	0	0	5.7
1	0	0	0
1	0	0	0
1	0	0	10.35
1	0	0	0
1	0	0	0
1	0	0	11.85
1	0	0	0
1	0	0	0
1	0	0	0
1	0	0	12.3
1	0	0	17.25
1	0	0	0
1	0	0	0
1	0	0	0
1	0	0	0
1	0	0	0
1	0	0	0
1	0	0	4.2
1	0	0	0
1	0	0	0
1	0	0	0
1	0	0	18.6
1	0	0	0
1	0	0	9.6
1	0	0	0
1	0	0	11.1
1	0	0	9.9
1	0	0	0
1	0	1	0
1	0	1	11.7
1	0	1	0
1	0	1	5.4
1	0	1	0
1	0	1	0
1	0	1	9.75
1	0	1	0
1	0	1	0
1	0	1	0
1	0	1	8.1
1	0	1	0
1	0	1	0
1	0	1	10.05
1	0	1	0
1	0	1	10.35
1	0	1	0
1	0	1	10.95
1	0	1	0
1	0	1	0
1	0	1	0
1	0	1	12.6
1	0	1	0
1	0	1	14.7
1	0	1	7.8
1	0	1	0
1	0	1	15.3
1	0	1	0
1	0	1	0
1	0	1	10.05
1	1	0	0
1	1	0	0
1	1	0	0
1	1	0	0
1	1	0	0
1	1	0	0
1	1	0	6
1	1	0	0
1	1	0	0
1	1	0	6.3
1	1	0	0
1	1	0	5.55
1	1	0	0
1	1	0	0
1	1	0	0
1	1	0	0
1	1	0	0
1	1	0	4.8
1	1	0	0
1	1	0	0
1	1	0	0
1	1	0	0
1	1	0	5.7
1	1	0	0
1	1	0	0
1	1	0	0
1	1	0	0
1	1	0	0
1	1	0	0
1	1	0	4.95
1	1	1	0
1	1	1	4.05
1	1	1	0
1	1	1	0
1	1	1	0
1	1	1	0
1	1	1	0
1	1	1	0
1	1	1	0
1	1	1	5.85
1	1	1	0
1	1	1	6.6
1	1	1	0
1	1	1	0
1	1	1	0
1	1	1	0
1	1	1	7.95
1	1	1	0
1	1	1	0
1	1	1	0
1	1	1	0
1	1	1	0
1	1	1	0
1	1	1	0
1	1	1	0
1	1	1	4.65
1	1	1	0
1	1	1	0
1	1	1	5.7
1	1	1	0
2	0	0	0
2	0	0	0
2	0	0	9.6
2	0	0	0
2	0	0	0
2	0	0	0
2	0	0	13.2
2	0	0	8.55
2	0	0	0
2	0	0	0
2	0	0	7.35
2	0	0	0
2	0	0	5.7
2	0	0	0
2	0	0	0
2	0	0	7.95
2	0	0	12.15
2	0	0	0
2	0	0	0
2	0	0	0
2	0	0	0
2	0	0	4.35
2	0	0	0
2	0	0	12.9
2	0	0	0
2	0	0	0
2	0	0	0
2	0	0	5.85
2	0	0	0
2	0	0	0
2	0	1	0
2	0	1	13.65
2	0	1	4.2
2	0	1	0
2	0	1	16.8
2	0	1	0
2	0	1	7.8
2	0	1	0
2	0	1	0
2	0	1	6.75
2	0	1	10.2
2	0	1	0
2	0	1	0
2	0	1	5.25
2	0	1	4.2
2	0	1	0
2	0	1	4.5
2	0	1	0
2	0	1	0
2	0	1	0
2	0	1	7.2
2	0	1	12.6
2	0	1	0
2	0	1	0
2	0	1	12.75
2	0	1	0
2	0	1	7.95
2	0	1	0
2	0	1	11.55
2	0	1	0
2	1	0	0
2	1	0	0
2	1	0	0
2	1	0	4.35
2	1	0	0
2	1	0	0
2	1	0	6.15
2	1	0	0
2	1	0	0
2	1	0	5.25
2	1	0	7.35
2	1	0	0
2	1	0	0
2	1	0	0
2	1	0	5.1
2	1	0	0
2	1	0	0
2	1	0	0
2	1	0	0
2	1	0	4.65
2	1	0	0
2	1	0	4.8
2	1	0	0
2	1	0	0
2	1	0	0
2	1	0	0
2	1	0	7.05
2	1	0	8.4
2	1	0	0
2	1	0	0
2	1	1	0
2	1	1	5.7
2	1	1	0
2	1	1	0
2	1	1	0
2	1	1	7.65
2	1	1	0
2	1	1	6.45
2	1	1	0
2	1	1	0
2	1	1	5.7
2	1	1	0
2	1	1	6.9
2	1	1	5.7
2	1	1	0
2	1	1	0
2	1	1	0
2	1	1	0
2	1	1	5.4
2	1	1	0
2	1	1	0
2	1	1	0
2	1	1	5.25
2	1	1	0
2	1	1	6.15
2	1	1	0
2	1	1	0
2	1	1	0
2	1	1	0
2	1	1	0
3	0	0	8.25
3	0	0	4.35
3	0	0	0
3	0	0	0
3	0	0	0
3	0	0	0
3	0	0	0
3	0	0	0
3	0	0	9.3
3	0	0	0
3	0	0	8.1
3	0	0	0
3	0	0	0
3	0	0	7.35
3	0	0	8.55
3	0	0	11.1
3	0	0	0
3	0	0	8.85
3	0	0	7.8
3	0	0	6.45
3	0	0	0
3	0	0	5.7
3	0	0	6.45
3	0	0	10.35
3	0	0	6.15
3	0	0	0
3	0	0	0
3	0	0	0
3	0	0	7.2
3	0	0	0
3	0	1	5.4
3	0	1	0
3	0	1	6
3	0	1	0
3	0	1	8.25
3	0	1	0
3	0	1	6.3
3	0	1	0
3	0	1	0
3	0	1	0
3	0	1	6.45
3	0	1	0
3	0	1	9.6
3	0	1	7.8
3	0	1	8.25
3	0	1	7.2
3	0	1	5.7
3	0	1	5.7
3	0	1	8.7
3	0	1	8.25
3	0	1	8.7
3	0	1	0
3	0	1	8.1
3	0	1	0
3	0	1	0
3	0	1	0
3	0	1	4.5
3	0	1	0
3	0	1	0
3	0	1	6.9
3	1	0	0
3	1	0	0
3	1	0	0
3	1	0	2.4
3	1	0	3.45
3	1	0	0
3	1	0	4.8
3	1	0	5.1
3	1	0	5.25
3	1	0	0
3	1	0	0
3	1	0	0
3	1	0	0
3	1	0	0
3	1	0	0
3	1	0	6.6
3	1	0	4.05
3	1	0	4.65
3	1	0	5.85
3	1	0	4.8
3	1	0	0
3	1	0	0
3	1	0	5.55
3	1	0	0
3	1	0	6
3	1	0	0
3	1	0	0
3	1	0	0
3	1	0	0
3	1	0	5.55
3	1	1	0
3	1	1	4.2
3	1	1	0
3	1	1	0
3	1	1	0
3	1	1	0
3	1	1	0
3	1	1	5.55
3	1	1	0
3	1	1	5.4
3	1	1	5.1
3	1	1	0
3	1	1	5.1
3	1	1	4.5
3	1	1	0
3	1	1	0
3	1	1	0
3	1	1	0
3	1	1	0
3	1	1	0
3	1	1	4.5
3	1	1	5.4
3	1	1	0
3	1	1	0
3	1	1	1.95
3	1	1	8.85
3	1	1	2.85
3	1	1	0
3	1	1	0
3	1	1	0
4	0	0	0
4	0	0	0
4	0	0	0
4	0	0	5.4
4	0	0	0
4	0	0	5.4
4	0	0	5.55
4	0	0	7.05
4	0	0	5.25
4	0	0	0
4	0	0	8.7
4	0	0	8.25
4	0	0	5.4
4	0	0	4.65
4	0	0	0
4	0	0	0
4	0	0	6.45
4	0	0	0
4	0	0	6
4	0	0	0
4	0	0	0
4	0	0	0
4	0	0	0
4	0	0	7.35
4	0	0	8.7
4	0	0	0
4	0	0	6.45
4	0	0	6.3
4	0	0	0
4	0	0	7.05
4	0	1	0
4	0	1	6.3
4	0	1	3.9
4	0	1	0
4	0	1	0
4	0	1	0
4	0	1	8.25
4	0	1	0
4	0	1	7.05
4	0	1	0
4	0	1	0
4	0	1	0
4	0	1	0
4	0	1	6.6
4	0	1	8.85
4	0	1	0
4	0	1	8.85
4	0	1	8.55
4	0	1	9.3
4	0	1	0
4	0	1	0
4	0	1	0
4	0	1	0
4	0	1	0
4	0	1	0
4	0	1	1.8
4	0	1	4.65
4	0	1	0
4	0	1	6.75
4	0	1	5.7
4	1	0	0
4	1	0	0
4	1	0	0
4	1	0	4.95
4	1	0	0
4	1	0	5.1
4	1	0	0
4	1	0	0
4	1	0	6.45
4	1	0	7.05
4	1	0	0
4	1	0	5.25
4	1	0	6.6
4	1	0	0
4	1	0	0
4	1	0	3.9
4	1	0	5.25
4	1	0	5.4
4	1	0	5.4
4	1	0	4.5
4	1	0	6.75
4	1	0	6
4	1	0	6.9
4	1	0	4.5
4	1	0	0
4	1	0	5.25
4	1	0	6.45
4	1	0	5.25
4	1	0	0
4	1	0	0
4	1	1	0
4	1	1	0
4	1	1	0
4	1	1	0
4	1	1	4.2
4	1	1	5.25
4	1	1	0
4	1	1	0
4	1	1	0
4	1	1	0
4	1	1	0
4	1	1	5.1
4	1	1	5.25
4	1	1	5.1
4	1	1	5.25
4	1	1	4.95
4	1	1	0
4	1	1	6.9
4	1	1	0
4	1	1	6
4	1	1	4.8
4	1	1	0
4	1	1	0
4	1	1	0
4	1	1	0
4	1	1	0
4	1	1	0
4	1	1	7.5
4	1	1	0
4	1	1	0
5	0	0	0
5	0	0	0
5	0	0	0
5	0	0	0
5	0	0	0
5	0	0	0
5	0	0	0
5	0	0	18
5	0	0	0
5	0	0	0
5	0	0	0
5	0	0	0
5	0	0	0
5	0	0	0
5	0	0	0
5	0	0	0
5	0	0	0
5	0	0	0
5	0	0	0
5	0	0	15
5	0	0	0
5	0	0	0
5	0	0	0
5	0	0	15
5	0	0	0
5	0	0	18
5	0	0	16.5
5	0	0	13.5
5	0	0	18
5	0	0	21
5	0	0	0
5	0	0	0
5	0	0	0
5	0	0	0
5	0	0	0
5	0	0	16.5
5	0	0	0
5	0	0	0
5	0	0	21
5	0	0	0
5	0	0	18
5	0	0	0
5	0	0	16.5
5	0	0	0
5	0	0	0
5	0	0	10.5
5	0	0	0
5	0	0	0
5	0	0	0
5	0	0	15
5	0	0	15
5	0	0	0
5	0	0	0
5	0	0	12
5	0	0	22.5
5	0	0	0
5	0	0	0
5	0	0	12
5	0	0	0
5	0	0	18
5	1	0	0
5	1	0	0
5	1	0	0
5	1	0	0
5	1	0	0
5	1	0	0
5	1	0	0
5	1	0	0
5	1	0	7.2
5	1	0	0
5	1	0	0
5	1	0	7.65
5	1	0	0
5	1	0	0
5	1	0	5.25
5	1	0	7.05
5	1	0	6.3
5	1	0	5.85
5	1	0	0
5	1	0	0
5	1	0	0
5	1	0	0
5	1	0	5.55
5	1	0	0
5	1	0	6.15
5	1	0	7.2
5	1	0	0
5	1	0	0
5	1	0	0
5	1	0	0
5	1	1	4.35
5	1	1	0
5	1	1	0
5	1	1	0
5	1	1	0
5	1	1	0
5	1	1	5.7
5	1	1	3.3
5	1	1	0
5	1	1	0
5	1	1	5.4
5	1	1	0
5	1	1	0
5	1	1	0
5	1	1	0
5	1	1	0
5	1	1	0
5	1	1	5.85
5	1	1	0
5	1	1	0
5	1	1	0
5	1	1	0
5	1	1	0
5	1	1	7.35
5	1	1	6.45
5	1	1	0
5	1	1	0
5	1	1	0
5	1	1	0
5	1	1	0
6	0	1	0
6	0	1	0
6	0	1	0
6	0	1	0
6	0	1	0
6	0	1	0
6	0	1	0
6	0	1	27
6	0	1	22.5
6	0	1	0
6	0	1	0
6	0	1	24
6	0	1	0
6	0	1	0
6	0	1	0
6	0	1	0
6	0	1	18
6	0	1	0
6	0	1	0
6	0	1	0
6	0	1	0
6	0	1	22.5
6	0	1	22.5
6	0	1	0
6	0	1	21
6	0	1	25.5
6	0	1	0
6	0	1	0
6	0	1	0
6	0	1	0
6	0	1	0
6	0	1	0
6	0	1	16.5
6	0	1	0
6	0	1	27
6	0	1	22.5
6	0	1	21
6	0	1	0
6	0	1	0
6	0	1	0
6	0	1	0
6	0	1	0
6	0	1	0
6	0	1	0
6	0	1	27
6	0	1	21
6	0	1	16.5
6	0	1	0
6	0	1	0
6	0	1	16.5
6	0	1	18
6	0	1	0
6	0	1	18
6	0	1	0
6	0	1	27
6	0	1	0
6	0	1	0
6	0	1	0
6	0	1	0
6	0	1	0
6	1	0	0
6	1	0	0
6	1	0	0
6	1	0	0
6	1	0	5.55
6	1	0	0
6	1	0	5.25
6	1	0	0
6	1	0	0
6	1	0	0
6	1	0	3.45
6	1	0	4.8
6	1	0	0
6	1	0	4.65
6	1	0	3
6	1	0	0
6	1	0	0
6	1	0	3.75
6	1	0	5.25
6	1	0	0
6	1	0	0
6	1	0	3.75
6	1	0	0
6	1	0	3.15
6	1	0	4.95
6	1	0	0
6	1	0	0
6	1	0	0
6	1	0	4.35
6	1	0	0
6	1	1	0
6	1	1	5.7
6	1	1	0
6	1	1	0
6	1	1	6.45
6	1	1	0
6	1	1	0
6	1	1	0
6	1	1	0
6	1	1	5.25
6	1	1	0
6	1	1	0
6	1	1	4.2
6	1	1	0
6	1	1	0
6	1	1	0
6	1	1	5.4
6	1	1	6
6	1	1	0
6	1	1	0
6	1	1	0
6	1	1	0
6	1	1	5.25
6	1	1	0
6	1	1	0
6	1	1	0
6	1	1	6.75
6	1	1	0
6	1	1	0
6	1	1	5.1
7	0	0	0
7	0	0	0
7	0	0	0
7	0	0	0
7	0	0	0
7	0	0	0
7	0	0	0
7	0	0	0
7	0	0	0
7	0	0	0
7	0	0	0
7	0	0	0
7	0	0	0
7	0	0	0
7	0	0	0
7	0	0	0
7	0	0	0
7	0	0	0
7	0	0	0
7	0	0	0
7	0	0	8.59271
7	0	0	0
7	0	0	0
7	0	0	0
7	0	0	0
7	0	0	0
7	0	0	0
7	0	0	0
7	0	0	0
7	0	0	0
7	0	1	0
7	0	1	0
7	0	1	0
7	0	1	0
7	0	1	0
7	0	1	0
7	0	1	0
7	0	1	0
7	0	1	0
7	0	1	0
7	0	1	0
7	0	1	0
7	0	1	0
7	0	1	0
7	0	1	0
7	0	1	0
7	0	1	0
7	0	1	0
7	0	1	0
7	0	1	0
7	0	1	0
7	0	1	0
7	0	1	0
7	0	1	0
7	0	1	0
7	0	1	0
7	0	1	0
7	0	1	0
7	0	1	0
7	0	1	0
7	1	0	0
7	1	0	0
7	1	0	0
7	1	0	0
7	1	0	0
7	1	0	0
7	1	0	0
7	1	0	0
7	1	0	0
7	1	0	0
7	1	0	0
7	1	0	0
7	1	0	0
7	1	0	0
7	1	0	0
7	1	0	0
7	1	0	0
7	1	0	0
7	1	0	0
7	1	0	0
7	1	0	0
7	1	0	0
7	1	0	0
7	1	0	0
7	1	0	0
7	1	0	0
7	1	0	0
7	1	0	0
7	1	0	0
7	1	0	0
7	1	1	0
7	1	1	0
7	1	1	0
7	1	1	0
7	1	1	0
7	1	1	0
7	1	1	0
7	1	1	0
7	1	1	0
7	1	1	0
7	1	1	0
7	1	1	0
7	1	1	0
7	1	1	0
7	1	1	0
7	1	1	13.3092
7	1	1	0
7	1	1	0
7	1	1	0
7	1	1	0
7	1	1	0
7	1	1	0
7	1	1	0
7	1	1	0
7	1	1	0
7	1	1	0
7	1	1	0
7	1	1	0
7	1	1	0
7	1	1	0
8	0	0	0
8	0	0	0
8	0	0	23.1362
8	0	0	0
8	0	0	0
8	0	0	0
8	0	0	0
8	0	0	0
8	0	0	0
8	0	0	0
8	0	0	0
8	0	0	0
8	0	0	0
8	0	0	15.8265
8	0	0	0
8	0	0	0
8	0	0	24.4167
8	0	0	0
8	0	0	0
8	0	0	0
8	0	0	21.063
8	0	0	7.30915
8	0	0	0
8	0	0	19.4058
8	0	0	0
8	0	0	0
8	0	0	15.3432
8	0	0	18.0658
8	0	0	0
8	0	0	8.62969
8	0	1	0
8	0	1	0
8	0	1	27.9715
8	0	1	0
8	0	1	0
8	0	1	12.2154
8	0	1	14.8903
8	0	1	20.7543
8	0	1	0
8	0	1	34.1426
8	0	1	0
8	0	1	19.3096
8	0	1	14.2515
8	0	1	0
8	0	1	16.2585
8	0	1	8.08367
8	0	1	0
8	0	1	20.3958
8	0	1	16.6365
8	0	1	0
8	0	1	16.8715
8	0	1	0
8	0	1	21.1853
8	0	1	0
8	0	1	26.921
8	0	1	0
8	0	1	14.4108
8	0	1	0
8	0	1	0
8	0	1	0
8	1	0	0
8	1	0	0
8	1	0	0
8	1	0	0
8	1	0	0
8	1	0	0
8	1	0	0
8	1	0	0
8	1	0	0
8	1	0	0
8	1	0	0
8	1	0	0
8	1	0	0
8	1	0	0
8	1	0	0
8	1	0	0
8	1	0	0
8	1	0	0
8	1	0	0
8	1	0	0
8	1	0	0
8	1	0	0
8	1	0	0
8	1	0	0
8	1	0	0
8	1	0	0
8	1	0	0
8	1	0	0
8	1	0	0
8	1	1	0
8	1	1	0
8	1	1	0
8	1	1	0
8	1	1	0
8	1	1	0
8	1	1	0
8	1	1	0
8	1	1	0
8	1	1	0
8	1	1	0
8	1	1	0
8	1	1	0
8	1	1	0
8	1	1	0
8	1	1	0
8	1	1	0
8	1	1	0
8	1	1	0
8	1	1	8.43574
8	1	1	0
8	1	1	0
8	1	1	0
8	1	1	0
8	1	1	0
8	1	1	0
8	1	1	0
8	1	1	0
8	1	1	0
8	1	1	0
8	1	1	0
